# Supplementary material for: In Silico Genome Analysis Reveals the Evolution and Potential Impact of SARS-CoV-2 Omicron Structural Changes on Host Immune Evasion and Antiviral Therapeutics
Source: Viruses. 2022 Nov 6;14(11):2461. doi: 10.3390/v14112461 (PMC9697451; doi:10.3390/v14112461)
Supplement: Supplementary file 1 [file viruses-14-02461-s001.zip]

Archive with 8 entries (8 files):
- Supplementary Figures.pdf
- Table_S1_10292022.xlsx
- Table_S2_10292022-.xlsx
- Table_S3_10292022.xlsx
- Table_S4_10292022.xlsx
- Table_S5_10292022.xlsx
- Table_S6_10292022.xlsx
- Table_S7_10292022.xlsx
