# Supplementary material for: In Silico Genome Analysis Reveals the Evolution and Potential Impact of SARS-CoV-2 Omicron Structural Changes on Host Immune Evasion and Antiviral Therapeutics
Source: Viruses. 2022 Nov 6;14(11):2461. doi: 10.3390/v14112461 (PMC9697451; doi:10.3390/v14112461)
Supplement: Supplementary file 1 [file viruses-14-02461-s001.zip › Table_S2_10292022-.xlsx]

## Sheet: Spike_domain_mutations
Table S2: Common and unique mutations of Spike protein among the VOC, with emphasis on Omicron variant. The nature of the mutations in each VOC are identified in comparison with a reference strain sequence (EPI_ISL_402124). This table summarizes common and unique mutations to their respective domains (NTD, N-terminal Domain; RBD, Receptor Binding Domain; HR1 and HR-2, Heptad Repeats-1 and -2; FP,…
Spike protein mutations (Source: GISAID, 10.10.2022)
COMMON IN VOC
Domain	Total	Positions
NTD	528	S13I, Q14H, Q14K, Q14R, C15del, V16F, N17D, N17del, L18F, T19I, T19K, T19R, T20I, T20N, R21I, R21T, T22A, T22I, L24S, P25H, P25L, P25S, P25T, P26L, P26S, A27S, A27T, A27V, Y28H, T29A, T29I, N30del, N30H, N30S, N30T, S31del, F32L, T33I, T33K, R34C, R34L, R34P, G35C, G35R, V36F, V36I, Y38L, P39S, S46L, V47F, H49Y, S50L, T51I, Q52H, Q52K, D53G, D53N, L54F, F58L, V62del, V62F, V62I, V62L, T63del, T63…
RBD	318	R319del, R319T, V320del, V320F, V320L, Q321del, Q321P, P322del, T323del, T323I, E324del, E324Q, S325del, S325P, I326del, V327del, V327L, F329del, P330L, P330S, T333I, T333K, N334K, P337S, F338L, G339D, G339S, G339V, V341I, A344S, A344T, R346I, R346K, R346S, R346T, A348S, S349P, A352S, A352V, N354D, N354K, K356R, R357K, S359N, V362F, V367A, V367F, V367I, Y369H, S371A, S371F, A372V, S373L, S373P, T…
FP	35	K790N, T791I, T791K, P792L, P792S, P792T, P793del, P793L, P793Q, P793S, I794del, I794N, K795del, K795N, K795R, D796del, D796H, D796Y, F797C, F797del, G798del, G799D, G799del, G799S, G799V, F800del, N801del, N801stop, F802del, S803del, Q804del, Q804P, Q804T, I805del, L806del
HR1	58	Q913H, L916F, Y917stop, K921E, L922F, A924S, A924V, S929del, S929I, S929T, A930V, G932D, G932S, I934V, D936G, D936H, D936N, D936Y, S937L, L938F, L938I, S939F, S939Y, S940F, S940Y, T941I, A942S, A942V, S943G, S943I, S943P, S943T, G946E, G946V, K947R, D950B, D950H, D950N, D950Y, Q954H, Q957H, Q957R, A958L, T961M, N969K, F970del, G971del, A972del, I973del, S974del, S975del, V976del, V976G, L977del, …
HR2	71	D1163G, D1163H, D1163Y, V1164F, D1165N, G1167R, G1167V, D1168G, D1168Y, S1170F, S1170Y, G1171D, G1171V, I1172M, A1174V, S1175A, S1175L, V1176F, V1177I, V1177L, I1179L, I1179V, Q1180K, K1181N, K1181T, E1182D, E1182K, E1182Q, I1183L, I1183V, D1184H, D1184T, D1184Y, ins1184ASMRLPRIstopM, R1185C, R1185H, R1185N, N1187K, N1187S, N1187Y, E1188D, E1188S, E1188V, V1189A, V1189I, A1190S, A1190T, K1191N, N…
TM	37	Y1215H, I1216T, I1216V, G1219C, G1219V, F1220L, I1221V, A1222V, G1223S, G1223V, L1224F, L1224S, L1224V, I1225F, A1226T, A1226V, I1227V, V1228L, M1229I, M1229L, M1229T, M1229V, V1230A, V1230L, V1230M, T1231A, T1231S, I1232F, M1233L, M1233T, L1234F, C1235F, C1236F, C1236S, M1237I, M1237T, M1237V
CT	48	T1238I, T1238S, S1239C, S1239G, S1239N, S1239T, C1241F, S1242I, S1242N, C1243F, L1244F, K1245N, K1245R, G1246S, C1247F, C1247S, S1249F, C1250F, G1251E, G1251R, G1251V, S1252F, S1252P, C1253Y, C1254F, E1258D, E1258Q, D1259H, D1259Y, D1260A, D1260G, D1260H, D1260N, D1260Y, S1261F, E1262D, P1263L, P1263Q, P1263R, P1263S, V1264L, V1264M, L1265F, K1266E, K1266R, G1267R, G1267V, H1271Y
None	646	F2L, V3G, F4L, ins5F, L5F, V6A, V6F, V6L, L7F, L8F, P9L, P9S, V11A, V11F, V11I, V11L, S12C, S12F, F306del, F306L, T307del, T307I, V308del, V308I, V308L, E309del, E309G, E309K, K310del, G311del, G311R, I312del, Y313del, Q314del, Q314K, T315del, S316del, S316F, N317del, F318del, F318L, F318N, F543L, T547I, T547K, V551F, L552V, T553I, T553L, E554D, E554G, E554K, E554Q, N556D, N556K, K558N, K558R, K5…
UNIQUE TO OMICRON
Domain	Total	Positions
NTD	3056	ins13S, S13F, S13V, Q14D, Q14M, Q14N, C15D, C15H, C15I, C15L, C15N, C15Q, C15stop, ins15XXX, ins16SEM, ins16SHSR, V16E, V16S, ins17PRE, N17A, N17E, N17H, N17L, N17Q, ins18I, L18C, L18D, T19J, T19M, T19Q, T19Y, T20C, T20L, T20R, T20Y, ins21KD, R21C, T22M, T22Q, T22R, T22Y, ins23CY, ins23K, ins23S, ins23SRY, ins23stopIF, ins23Tstopstop, Q23A, Q23D, Q23G, Q23T, Q23Z, L24A, L24C, L24G, L24M, L24R, L2…
RBD	1459	ins319D, ins319F, ins319S, ins319SVS, ins319XX, R319A, R319C, R319D, R319N, R319Y, ins320FE, ins320G, ins320LCF, ins320S, ins320VTTFDSEY, ins320W, ins320XXXXXF, ins320XXXXXX, ins320XXXXXXXXXXXX, V320H, V320K, V320M, V320Q, V320W, ins321S, ins321stop, ins321XXXXXXXXXXX, Q321A, Q321C, Q321G, Q321I, Q321T, Q321V, ins322ETA, ins322L, ins322TESIXX, ins322TEWWGAIKT, P322K, P322stop, P322Y, ins323ESIVRF…
FP	62	I788C, I788stop, Y789S, ins790H, K790Y, ins791I, ins791P, T791F, T791Q, ins792T, P792E, P792F, P792G, P793stop, I794A, ins795LQLE, ins795YQT, ins795YSN, K795P, K795Y, D796C, D796P, D796S, ins796QTF, F797A, F797H, F797K, F797stop, G798H, G798Q, G799H, G799stop, ins799V, ins799XX, F800C, F800D, F800E, F800P, F800Q, F800W, ins800stop, ins800T, ins801ILVVL, N801E, N801V, F802A, F802N, F802P, F802T, i…
HR1	206	ins912DIstopEP, ins912LSYI, ins912Sstop, Q913A, Q913I, Q913M, V915D, V915H, V915K, ins916stopEPK, L916D, L916K, L916Q, Y917A, Y917R, E918I, E918L, ins919GLstop, N919A, N919C, N919G, N919Q, N919Y, Q920D, Q920I, K921A, K921F, K921P, K921stop, K921W, ins922D, ins922stop, ins922stopEPK, L922N, L922R, I923K, I923N, A924I, A924K, N925E, ins926I, Q926F, F927A, F927H, F927stop, ins927EstopCYWQ, ins928sto…
HR2	210	D1163I, ins1163W, ins1164XX, V1164D, V1164Y, ins1165LGDISGN, ins1165WLSR, ins1166GDISGINASVVNIQKEIDRLNEVAKNLNESLIDLQEXXXXXXXXDVDL, ins1166K, L1166P, L1166T, G1167M, G1167Y, ins1167AR, ins1167ARDVTstopI, ins1167DIS, ins1167NFYGPFVDRQTAQAAGT, D1168F, D1168I, D1168stop, ins1168L, I1169Y, ins1169RstopIFstopE, ins1169XX, ins1169XXX, ins1170LWQF, S1170D, S1170Q, S1170V, S1170W, G1171L, G1171P, ins1171K…
TM	84	ins1214V, W1214K, W1214Q, ins1215IWLGFIAGLIAIY, ins1215KQFD, Y1215A, Y1215I, Y1215L, Y1215R, ins1216ARFYS, ins1216LstopLAstopLPstopstop, W1217H, W1217P, W1217S, ins1218DCHXN, L1218R, L1218S, L1218T, G1219E, G1219K, G1219N, G1219P, G1219Y, F1220D, F1220R, ins1220F, I1221D, I1221N, I1221Q, ins1221W, A1222M, A1222Y, G1223H, G1223K, G1223P, G1223Q, G1223R, G1223T, ins1223stopLPstopstopWstopQL, ins122…
CT	100	T1238C, T1238K, ins1239AP, ins1239GDNYAFAXXXX, ins1239LAX, ins1239XXXXXXXV, S1239F, S1239W, C1240K, C1240N, C1240T, ins1240DL, C1241N, C1241T, ins1241C, ins1241LNS, S1242D, S1242F, S1242H, S1242P, C1243A, C1243E, C1243M, C1243P, ins1243TXXXX, L1244K, L1244N, L1244Q, ins1245D, ins1245GCLC, K1245F, K1245W, K1245Y, G1246F, G1246H, G1246I, C1247E, C1247H, C1247stop, ins1247CCG, ins1247YCR, S1249G, S1…
None	2053	M1K, M1T, F2A, F2K, F2W, ins3Y, V3H, V3M, V3S, F4M, F4R, L5K, L5N, L5Y, V6D, V6N, V6S, V6Y, ins7VDLstop, L7C, L7D, L7G, L7J, L7K, L7T, ins8Hstop, L8G, L8K, L8N, L8P, P9C, P9F, P9H, P9K, P9stop, P9W, ins10HW, L10R, ins11XXX, V11G, V11K, V11P, V11R, V11stop, V11Y, S12E, S12L, S12M, S12V, F306E, F306H, F306M, F306Q, F306stop, F306T, F306W, ins306EPIQMLstop, ins306EPLQMLstop, ins306ER, ins306F, ins30…
