# Supplementary material for: In Silico Genome Analysis Reveals the Evolution and Potential Impact of SARS-CoV-2 Omicron Structural Changes on Host Immune Evasion and Antiviral Therapeutics
Source: Viruses. 2022 Nov 6;14(11):2461. doi: 10.3390/v14112461 (PMC9697451; doi:10.3390/v14112461)
Supplement: Supplementary file 1 [file viruses-14-02461-s001.zip › Table_S3_10292022.xlsx]

## Sheet: Sheet1
Table S3 - Common and unique mutations of Envelope (E), Membrane (M), and Nucleocapsid (N) protein among the VOCs, with an emphasis to Omicron variant. The nature of the mutations in each VOC are identified in comparison with a Reference strain sequence (EPI_ISL_402124). This table summarizes common and unique mutations to their respective domains in the tertiary monomeric structure of E, M, and …
M, E, and N protein mutations (Source: GISAID, 10.10.2022)
COMMON IN VOC
Domain	Total	Positions
Membrane	194	A2P, A2S, A2T, A2V, D3G, D3H, D3Y, S4F, S4P, N5D, G6V, T7I, T7N, I8F, I8S, V10A, V10I, K14R, K15E, K15N, K15Q, K15R, K15S, L16I, L16S, L17F, L17I, Q19K, V23A, V23L, I24L, G25S, F26del, L27del, L27I, L29F, L29I, W31C, C33F, L34F, A38S, A40P, A40S, R44K, F45L, L46F, I48L, I49V, I52V, F53L, A63S, A63T, C64F, C64S, F65L, V66L, A68S, A69G, A69S, V70F, V70I, V70L, Y71H, I73L, I73V, N74S, W75L, I76T, I7…
Envelope	66	S3L, F4L, V5F, V5I, E8D, T9I, G10C, T11A, L19F, L21F, L21I, A22V, F23L, V24A, V24M, F26L, T30I, A32del, I33del, L34del, T35del, A36del, A36V, L37del, R38del, L39del, L39S, C40del, A41P, A41S, A41V, C43F, C44A, N45S, I46V, N48C, V49A, V49L, S50L, L51F, K53N, P54L, S55F, F56L, V58F, V58I, V58L, R61L, V62F, N64S, N66K, S68P, R69K, R69S, V70A, V70S, P71L, P71S, P71V, D72Y, L73F, L73R, L73V, L74M, L74…
Nucleocapsid	677	S2F, D3L, D3Y, G5E, P6H, P6L, P6S, P6T, Q7H, Q7K, N8D, N8S, N8Y, Q9H, Q9L, R10P, R10Q, N11D, N11I, N11S, A12S, A12T, A12V, P13L, P13S, P13T, R14C, R14H, R14L, T16M, G18C, G18V, G19R, P20L, P20S, S21Q, D22N, D22Y, S23L, S23P, T24A, T24I, G25C, G25D, G25S, S26C, S26I, N27D, Q28H, N29D, N29S, N29T, N29Y, G30R, G30V, R32H, S33I, G34E, G34R, G34V, G34W, A35E, A35R, A35S, A35T, A35V, R36D, R36Q, S37L, …
UNIQUE TO OMICRON
Domain	Total	Positions
Membrane	1011	A2I, A2K, D3C, D3I, D3K, D3S, D3T, S4L, ins5L, N5E, N5F, G6E, G6L, ins7MLAN, ins7T, T7F, I8A, I8G, ins9P, T9L, ins10A, ins10AMA, V10S, V10T, V10W, E11F, E11L, E12I, E12L, ins12XXX, L13C, L13J, L13M, L13Q, L13S, L13W, K14D, K14Y, K15G, K15H, K15stop, ins16DXX, ins16PstopR, L16A, L16C, L16M, ins17GM, ins17RM, L17E, L17H, L17Q, L17R, L17Y, E18C, E18M, ins18GTITVEELKKLLE, ins18HTITVEELKKLLE, ins19GTs…
Envelope	204	Y2C, Y2D, Y2F, S3del, S3F, V5Y, ins6G, S6D, S6I, E8P, E8Y, E8Z, ins9I, T9J, T9L, T9M, T9N, T9stop, T9V, G10D, L12J, I13F, I13S, I13T, V14G, V14K, V14N, V14P, N15E, N15L, ins16H, ins16R, S16F, S16L, S16Q, S16V, V17M, L18S, L18Y, L19H, F20P, L21C, A22D, A22H, F23G, F23R, F23T, ins23R, ins24XXXX, V24P, ins25ASYTSHPYCAS, ins25EVKALD, V25K, F26G, F26P, ins26AAILLTstopVLstopN, ins26TstopVG, ins26TstopV…
Nucleocapsid	1835	M1A, M1R, S2C, S2D, S2Q, S2T, D3S, ins4DWR, N4del, N4G, N4M, N4P, N4Q, N4R, N4V, G5D, G5del, G5K, G5M, G5P, ins5I, ins5T, ins6L, ins6LKI, P6D, P6del, P6G, ins7I, ins7K, Q7C, Q7F, Q7G, Q7I, Q7N, Q7S, ins8CA, ins8GCV, ins8I, ins8P, ins8stop, ins8W, N8E, N8P, N8stop, N8V, ins9AEM, Q9C, Q9G, Q9I, Q9T, R10H, R10I, R10M, R10S, R10T, ins11C, ins11CT, ins11ETSVVTYCTSKAIL, N11C, N11E, N11F, N11L, N11R, N1…
	3050
