# Supplementary material for: In Silico Genome Analysis Reveals the Evolution and Potential Impact of SARS-CoV-2 Omicron Structural Changes on Host Immune Evasion and Antiviral Therapeutics
Source: Viruses. 2022 Nov 6;14(11):2461. doi: 10.3390/v14112461 (PMC9697451; doi:10.3390/v14112461)
Supplement: Supplementary file 1 [file viruses-14-02461-s001.zip › Table_S4_10292022.xlsx]

## Sheet: Common Structural mutation freq
Table S4: Mutations, insertions, and deletions that are commonly present in the structural proteins (Spike, Envelope, Membrane, and Nucleocapsid) of the five VOCs provided along with the frequency (%) of each change in 12,002,213 VOC sequences;
Spike	Count	Proportion (%)	Nucleocapsid	Count	Proportion (%)	Membrane	Count	Proportion (%)	Envelope	Count	Proportion (%)
A1016T	168	0.001	A119S	10900	0.091	A104S	439	0.004	A22V	357	0.003
A1016V	729	0.006	A119T	646	0.005	A104V	5098	0.042	A32del	49	0
A1020S	56429	0.47	A125V	2945	0.025	A142V	1822	0.015	A36del	66	0.001
A1020V	5190	0.043	A12S	6387	0.053	A188S	804	0.007	A36V	231	0.002
A1025L	166	0.001	A12T	1358	0.011	A188T	239	0.002	A41P	329	0.003
A1026S	986	0.008	A12V	3111	0.026	A194S	92	0.001	A41S	793	0.007
A1056S	546	0.005	A134V	9404	0.078	A2P	214	0.002	A41V	2223	0.019
A1070C	213	0.002	A138S	2457	0.02	A2S	25834	0.215	C40del	54	0
A1070S	3326	0.028	A152S	19804	0.165	A2T	2159	0.018	C43F	811	0.007
A1070T	779	0.006	A152V	4430	0.037	A2V	10464	0.087	C44A	335	0.003
A1070V	3717	0.031	A155V	4698	0.039	A38S	1630	0.014	D72Y	846	0.007
A1078C	216	0.002	A156S	10948	0.091	A40P	127	0.001	E8D	627	0.005
A1078S	30390	0.253	A173V	9258	0.077	A40S	3392	0.028	F23L	772	0.006
A1078T	1162	0.01	A182S	8566	0.071	A63S	1360	0.011	F26L	1248	0.01
A1078V	1245	0.01	A182T	752	0.006	A63T	5863158	48.851	F4L	514	0.004
A1080S	277	0.002	A208del	3087	0.026	A68S	1001	0.008	F56L	421	0.004
A1087S	6205	0.052	A208G	901	0.008	A69G	151	0.001	G10C	402	0.003
A1174V	1277	0.011	A208S	49091	0.409	A69S	7872	0.066	I33del	68	0.001
A1190S	533	0.004	A208V	5411	0.045	A81S	31186	0.26	I46V	375	0.003
A1190T	72	0.001	A211del	2035	0.017	A83S	1414	0.012	K53N	23	0
A1222V	134	0.001	A211S	6311	0.053	A83T	1125	0.009	L19F	365	0.003
A1226T	52	0	A211V	5755	0.048	A85S	2030	0.017	L21F	4535	0.038
A1226V	290	0.002	A217del	282	0.002	A85V	2721	0.023	L21I	465	0.004
A123V	299	0.002	A217S	4800	0.04	A98del	252	0.002	L34del	69	0.001
A163del	2334	0.019	A217T	571	0.005	A98G	25	0	L37del	67	0.001
A163L	446	0.004	A217V	248	0.002	A98Q	348	0.003	L39del	111	0.001
A163V	1412	0.012	A218del	239	0.002	A98S	3148	0.026	L39S	312	0.003
A222del	502	0.004	A218V	431	0.004	C33F	2163	0.018	L51F	345	0.003
A222L	120	0.001	A220del	41	0	C64F	1230	0.01	L73F	7090	0.059
A222S	5829	0.049	A220V	376	0.003	C64S	423	0.004	L73R	37	0
A222V	454557	3.787	A251S	3342	0.028	C86del	124	0.001	L73V	455	0.004
A243del	46172	0.385	A251V	4946	0.041	C86F	2079	0.017	L74M	217	0.002
A243I	24	0	A252del	72	0.001	C86S	223	0.002	L74P	259	0.002
A243P	145	0.001	A252S	4215	0.035	D160N	41	0	N45S	339	0.003
A243S	4506	0.038	A252V	3314	0.028	D160Y	381	0.003	N48C	325	0.003
A243T	219	0.002	A254S	952	0.008	D163N	199	0.002	N64S	536	0.004
A260del	425	0.004	A254T	320	0.003	D190Y	8	0	N66K	1139	0.009
A260S	1332	0.011	A254V	777	0.006	D209H	775	0.006	P54L	65	0.001
A260V	664	0.006	A267del	65	0.001	D209Y	6962	0.058	P71L	44621	0.372
A262D	147	0.001	A267S	2839	0.024	D215N	51	0	P71S	4037	0.034
A262del	231	0.002	A267V	2236	0.019	D215Y	199	0.002	P71V	16	0
A262S	14712	0.123	A273del	41	0	D3G	2286613	19.052	R38del	111	0.001
A262T	417	0.003	A273S	4559	0.038	D3H	889	0.007	R61L	5085	0.042
A262V	1749	0.015	A273T	144	0.001	D3Y	1815	0.015	R69K	127	0.001
A263del	212	0.002	A308S	4113	0.034	E115D	305	0.003	R69S	464	0.004
A263E	29	0	A311T	1784	0.015	E115Q	188	0.002	S3L	250	0.002
A263S	870	0.007	A313S	714	0.006	E167Q	1120	0.009	S50L	319	0.003
A263T	988	0.008	A336del	135	0.001	F100L	1404	0.012	S55F	15958	0.133
A263V	1449	0.012	A336V	3389	0.028	F112L	128	0.001	S68P	538	0.004
A264del	197	0.002	A359S	7474	0.062	F112Y	192	0.002	T11A	15504	0.129
A264S	1161	0.01	A359T	1024	0.009	F26del	55	0	T30I	726	0.006
A264T	450	0.004	A359V	348	0.003	F45L	173	0.001	T35del	66	0.001
A264V	916	0.008	A35E	220	0.002	F53L	596	0.005	T9I	5890580	49.079
A27S	3395397	28.29	A35R	1007	0.008	F65L	106	0.001	V24A	237	0.002
A27T	531	0.004	A35S	2121	0.018	F96del	284	0.002	V24M	1939	0.016
A27V	4503	0.038	A35T	4115	0.034	F96V	81	0.001	V49A	52	0
A288del	202	0.002	A35V	4368	0.036	G25S	121	0.001	V49L	3366	0.028
A288V	918	0.008	A376G	89	0.001	G6V	998	0.008	V58F	9665	0.081
A292del	151	0.001	A376L	392	0.003	G78C	1868	0.016	V58I	1319	0.011
A344S	2503	0.021	A376T	803	0.007	G78S	976	0.008	V58L	1036	0.009
A344T	430	0.004	A376V	1638	0.014	G79A	27	0	V5F	597	0.005
A348S	3221	0.027	A381del	458	0.004	G79V	430	0.004	V5I	1246	0.01
A352S	1606	0.013	A381S	1752	0.015	G89del	310	0.003	V62F	24463	0.204
A352V	506	0.004	A381T	1531	0.013	H125R	2302	0.019	V70A	123	0.001
A372V	530	0.004	A397S	599	0.005	H125Y	10950	0.091	V70S	11	0
A397del	224	0.002	A397T	54	0	H148Y	1598	0.013	V75L	920	0.008
A411del	162	0.001	A397V	562	0.005	H154Y	84	0.001
A435del	168	0.001	A398S	2432	0.02	H155Y	5363	0.045
A435S	1000	0.008	A398V	12324	0.103	H210R	198	0.002
A475del	338	0.003	A414S	3510	0.029	I118del	100	0.001
A475S	830	0.007	A414T	501	0.004	I128T	344	0.003
A475T	230	0.002	A414V	1059	0.009	I144V	508	0.004
A475V	2130	0.018	A419S	866	0.007	I168F	55	0
A520del	105	0.001	A50S	1008	0.008	I217Y	165	0.001
A520Q	20	0	A55S	5843	0.049	I24L	203	0.002
A520S	6390	0.053	A90S	15295	0.127	I48L	146	0.001
A520V	298	0.002	D103F	123	0.001	I49V	397	0.003
A522del	96	0.001	D103G	466	0.004	I52V	321	0.003
A522E	57	0	D103N	1156	0.01	I73L	678	0.006
A522S	4371	0.036	D103Y	1735	0.014	I73V	209	0.002
A522T	216	0.002	D128E	933	0.008	I76T	1081	0.009
A522V	8009	0.067	D128H	703	0.006	I76V	3094	0.026
A570D	1185354	9.876	D128Y	1377	0.011	I80S	136	0.001
A570V	1112	0.009	D144E	229	0.002	I82S	297	0.002
A575S	1692	0.014	D144H	4950	0.041	I82T	4456174	37.128
A609S	45	0	D144N	1275	0.011	I8F	152	0.001
A623L	87	0.001	D144Y	3589	0.03	I8S	44	0
A623S	3293	0.027	D216del	334	0.003	I97del	280	0.002
A623V	3448	0.029	D225del	27	0	K14R	216	0.002
A626S	2801	0.023	D225E	123	0.001	K15E	196	0.002
A626V	945	0.008	D225T	131	0.001	K15N	3172	0.026
A647S	5220	0.043	D22N	526	0.004	K15Q	261	0.002
A653V	8208	0.068	D22Y	1009	0.008	K15R	610	0.005
A668S	301	0.003	D297H	544	0.005	K15S	490	0.004
A672V	2901	0.024	D297N	239	0.002	K162N	2116	0.018
A67del	1918	0.016	D297Y	1756	0.015	K205Q	166	0.001
A67G	65	0.001	D340del	176	0.001	L102F	278	0.002
A67S	7499	0.062	D340N	812	0.007	L119del	108	0.001
A67V	2451753	20.428	D340Y	311	0.003	L120del	102	0.001
A684S	1786	0.015	D341H	206	0.002	L124F	972	0.008
A684T	986	0.008	D341Y	285	0.002	L124I	586	0.005
A684V	6433	0.054	D343del	146	0.001	L129Q	288	0.002
A688S	1480	0.012	D343G	236739	1.972	L129V	168	0.001
A688V	21452	0.179	D343H	2287	0.019	L16I	79	0.001
A694S	130	0.001	D343Y	979	0.008	L16S	493	0.004
A694V	3828	0.032	D348H	5917	0.049	L17F	5238	0.044
A701V	254920	2.124	D348N	420	0.003	L17I	601	0.005
A706V	4756	0.04	D348Y	2251	0.019	L181F	69	0.001
A771S	3700	0.031	D358N	1164	0.01	L27del	57	0
A771T	138	0.001	D371E	1568	0.013	L27I	211	0.002
A783E	79	0.001	D371G	204	0.002	L29F	14015	0.117
A783K	51	0	D371Y	191	0.002	L29I	157	0.001
A783S	864	0.007	D377A	97	0.001	L34F	7147	0.06
A783T	220	0.002	D377M	413	0.003	L46F	2545	0.021
A783V	819	0.007	D377N	114	0.001	L87del	137	0.001
A829S	401	0.003	D377stop	78	0.001	L87F	2688	0.022
A831S	1718	0.014	D377V	1794	0.015	L90del	254	0.002
A831V	6160	0.051	D377Y	4382155	36.511	L90F	430	0.004
A845S	16471	0.137	D399H	1366	0.011	L90R	168	0.001
A845V	2889	0.024	D399N	995	0.008	L93del	249	0.002
A846S	3521	0.029	D399Y	3088	0.026	L93F	921	0.008
A846V	4912	0.041	D3L	1165890	9.714	M109I	3827	0.032
A852S	1356	0.011	D3Y	1094	0.009	M109L	511	0.004
A852V	715	0.006	D401del	55	0	M84I	1222	0.01
A871S	2245	0.019	D401G	151	0.001	M84L	633	0.005
A871V	1582	0.013	D401N	370	0.003	M84T	801	0.007
A879S	13610	0.113	D401Y	4113	0.034	M84V	293	0.002
A879T	780	0.006	D402A	91	0.001	M91del	248	0.002
A879V	7899	0.066	D402G	562	0.005	M91V	432	0.004
A890V	1508	0.013	D402Y	8012	0.067	N113S	188	0.002
A892S	1674	0.014	D415G	520	0.004	N113stop	271	0.002
A892V	3995	0.033	D415N	415	0.003	N117del	110	0.001
A893S	414	0.003	D63G	4360062	36.327	N121K	1384	0.012
A893V	874	0.007	D63N	1167	0.01	N207Y	368	0.003
A899S	2780	0.023	D63Y	2427	0.02	N5D	64	0.001
A899V	154	0.001	D81del	153	0.001	N74S	205	0.002
A903S	262	0.002	D81G	211	0.002	P114D	172	0.001
A924S	1750	0.015	D81Y	1009	0.008	Q19K	356	0.003
A924V	359	0.003	D98Q	119	0.001	R101T	280	0.002
A930V	121	0.001	E118Q	266	0.002	R105Q	119	0.001
A93S	1257	0.01	E136D	104919	0.874	R105T	281	0.002
A93V	77	0.001	E136Q	349	0.003	R107H	2228	0.019
A942S	5184	0.043	E231D	850	0.007	R131T	72	0.001
A942V	571	0.005	E231del	53	0	R146H	1968	0.016
A958L	86	0.001	E231R	184	0.002	R150L	485	0.004
A972del	74	0.001	E253D	1145	0.01	R158C	714	0.006
C1043V	366	0.003	E253del	80	0.001	R158L	1919	0.016
C1235F	7739	0.064	E253K	147	0.001	R44K	1297	0.011
C1236F	3845	0.032	E253stop	33	0	S111H	177	0.001
C1236S	843	0.007	E280G	75	0.001	S111L	279	0.002
C1241F	540	0.004	E280R	149	0.001	S136N	2440	0.02
C1243F	7278	0.061	E280V	273	0.002	S173K	2064	0.017
C1247F	6086	0.051	E290Q	190	0.002	S173stop	389	0.003
C1247S	691	0.006	E323K	188	0.002	S177A	38	0
C1250F	3893	0.032	E367D	1010	0.008	S197I	123	0.001
C1253Y	244	0.002	E367R	114	0.001	S197T	234	0.002
C1254F	1051	0.009	E378G	258	0.002	S214I	1827	0.015
C136F	459	0.004	E378K	455	0.004	S4F	4250	0.035
C136V	767	0.006	E378Q	2196	0.018	S4P	244	0.002
C15del	748	0.006	E378stop	93	0.001	S94C	156	0.001
C166del	971	0.008	E378V	407	0.003	S94del	261	0.002
C166R	11	0	E62K	178	0.001	S94I	434	0.004
C166S	692	0.006	F110del	190	0.002	S94T	836	0.007
C291del	159	0.001	F274W	113	0.001	S99del	207	0.002
C301del	172	0.001	F307L	1906	0.016	S99K	282	0.002
C379del	142	0.001	F363I	159	0.001	T106C	280	0.002
C391del	143	0.001	F363L	712	0.006	T127I	373	0.003
C432del	191	0.002	F53Y	996	0.008	T130I	81	0.001
C480del	367	0.003	G114del	175	0.001	T172R	24	0
C488del	385	0.003	G116del	162	0.001	T175M	2095	0.017
C525del	69	0.001	G120A	649	0.005	T208I	3416	0.028
C649L	75	0.001	G120V	2603	0.022	T208R	54	0
C738del	67	0.001	G147S	1868	0.016	T77I	1478	0.012
C749del	117	0.001	G164E	717	0.006	T7I	2382	0.02
D1041I	372	0.003	G170R	205	0.002	T7N	133	0.001
D1084H	401	0.003	G175del	53	0	V10A	1711	0.014
D1084Y	2527	0.021	G178D	1281	0.011	V10I	1186	0.01
D1118H	1185447	9.877	G178del	50	0	V139I	402	0.003
D1118Y	5785	0.048	G178S	1059	0.009	V23A	354	0.003
D111N	1443	0.012	G178V	1017	0.008	V23L	5869	0.049
D1127Y	267	0.002	G179C	1159	0.01	V66L	2160	0.018
D1139H	2240	0.019	G179del	55	0	V70F	4236	0.035
D1139Y	1827	0.015	G179S	6205	0.052	V70I	1338	0.011
D1146E	381	0.003	G18C	3852	0.032	V70L	20593	0.172
D1146H	1708	0.014	G18V	49807	0.415	V88del	231	0.002
D1146Y	1382	0.012	G19R	897	0.007	V88L	527	0.004
D1153G	403	0.003	G200C	3911	0.033	W110A	270	0.002
D1153Y	7066	0.059	G200D	2115	0.018	W31C	422	0.004
D1163G	669	0.006	G200del	72	0.001	W75L	1653	0.014
D1163H	622	0.005	G200S	1455	0.012	W92del	278	0.002
D1163Y	6490	0.054	G204A	831	0.007	Y178del	468	0.004
D1165N	173	0.001	G204del	3151	0.026	Y204W	165	0.001
D1168G	562	0.005	G204P	85343	0.711	Y71H	889	0.007
D1168Y	636	0.005	G204R	7082418	59.009	Y95del	271	0.002
D1184H	84	0.001	G204stop	130	0.001
D1184T	290	0.002	G212C	946	0.008
D1184Y	1375	0.011	G212D	985	0.008
D1199H	414	0.003	G212del	1095	0.009
D1199N	2738	0.023	G212V	1875	0.016
D1259H	6512	0.054	G214C	478	0.004
D1259Y	20682	0.172	G214del	7444	0.062
D1260A	184	0.002	G214S	909	0.008
D1260G	236	0.002	G214V	287	0.002
D1260H	243	0.002	G215C	3991883	33.26
D1260N	1942	0.016	G215del	5528	0.046
D1260Y	4183	0.035	G215L	68	0.001
D138del	1028	0.009	G215S	2819	0.023
D138H	35563	0.296	G236C	947	0.008
D138I	634	0.005	G236del	97	0.001
D138N	2157	0.018	G236V	3598	0.03
D138Y	130603	1.088	G238A	288	0.002
D178H	7591	0.063	G238C	12901	0.107
D178N	6170	0.051	G238D	798	0.007
D178T	395	0.003	G238S	1462	0.012
D178Y	868	0.007	G238V	2409	0.02
D198G	1006	0.008	G243A	220	0.002
D215A	126	0.001	G243C	9991	0.083
D215del	449	0.004	G243P	65	0.001
D215G	44302	0.369	G243S	2222	0.019
D215H	4925	0.041	G243V	728	0.006
D228H	1890	0.016	G25C	2629	0.022
D228L	52	0	G25D	1195	0.01
D228Y	711	0.006	G25S	1021	0.009
D253del	258	0.002	G275S	221	0.002
D253G	6153	0.051	G278N	142	0.001
D253Y	1281	0.011	G30R	650	0.005
D287del	192	0.002	G30V	211	0.002
D287G	527	0.004	G321C	247	0.002
D290del	212	0.002	G321V	529	0.004
D294del	186	0.002	G328del	132	0.001
D294E	77	0.001	G328R	187	0.002
D294G	80	0.001	G335del	191	0.002
D294N	136	0.001	G34E	1954	0.016
D389del	148	0.001	G34R	123	0.001
D389N	68	0.001	G34V	537	0.004
D398del	221	0.002	G34W	4572	0.038
D405del	145	0.001	G44C	1265	0.011
D405G	158	0.001	G44V	1643	0.014
D420del	126	0.001	G5E	3167	0.026
D420N	355	0.003	G60del	53	0
D427del	180	0.001	G60R	750	0.006
D427V	1397	0.012	G60S	543	0.005
D427Y	556	0.005	G69del	1440	0.012
D428del	184	0.002	G96C	2937	0.024
D428Y	98	0.001	G96V	591	0.005
D467del	163	0.001	G97C	230	0.002
D53G	222	0.002	G97S	2327	0.019
D53N	647	0.005	G99S	1458	0.012
D568N	515	0.004	H145N	168	0.001
D571E	231	0.002	H145Y	9580	0.08
D574H	169	0.001	H300L	407	0.003
D574Y	7975	0.066	H300N	366	0.003
D586N	294	0.002	H300Y	21185	0.177
D614del	80	0.001	H59del	63	0.001
D614G	11941625	99.495	I130T	517	0.004
D614S	184	0.002	I131L	373	0.003
D627A	135	0.001	I131T	340	0.003
D627E	517	0.004	I157T	865	0.007
D627G	905	0.008	I292T	1450	0.012
D627H	557	0.005	I320F	282	0.002
D737del	69	0.001	I337del	138	0.001
D737Q	185	0.002	I337F	573	0.005
D737Y	94	0.001	I74V	616	0.005
D745A	74	0.001	ins238Q	328	0.003
D745del	133	0.001	K102R	372	0.003
D796del	155	0.001	K102V	126	0.001
D796H	1359	0.011	K169del	65	0.001
D796Y	5973980	49.774	K169N	429	0.004
D808del	82	0.001	K169R	917	0.008
D808N	529	0.004	K233del	71	0.001
D808S	69	0.001	K237I	105	0.001
D80A	43262	0.36	K237R	2162	0.018
D80G	788	0.007	K256N	1058	0.009
D820del	108	0.001	K257del	104	0.001
D820E	313	0.003	K257R	394	0.003
D830G	212	0.002	K266del	59	0
D830T	20	0	K338del	128	0.001
D830Y	518	0.004	K355N	826	0.007
D839A	81	0.001	K361Q	109	0.001
D839S	42	0	K361R	866	0.007
D839Y	621	0.005	K369N	1011	0.008
D843G	653	0.005	K369R	1355	0.011
D843N	776	0.006	K369stop	118	0.001
D848del	84	0.001	K369T	249	0.002
D867N	185	0.002	K370N	6018	0.05
D88H	559	0.005	K372Q	161	0.001
D88N	225	0.002	K373N	32501	0.271
D88Y	548	0.005	K373R	952	0.008
D936G	856	0.007	K374E	846	0.007
D936H	3971	0.033	K374N	5416	0.045
D936N	2374	0.02	K374R	692	0.006
D936Y	10279	0.086	K375E	305	0.003
D950B	54120	0.451	K375N	1146	0.01
D950H	222	0.002	K375Q	101	0.001
D950N	4281210	35.67	K375R	902	0.008
D950Y	225	0.002	K387D	403	0.003
D979del	71	0.001	K387E	113	0.001
E1017D	71	0.001	K387N	975	0.008
E1072Q	216	0.002	K387R	4232	0.035
E1072R	219	0.002	K388R	965	0.008
E1092G	87	0.001	K38N	1393	0.012
E1092K	174	0.001	K38T	499	0.004
E1111del	58	0	K65N	498	0.004
E1111Q	2391	0.02	K65R	822	0.007
E1144K	74	0.001	L113del	179	0.001
E1144Q	1351	0.011	L113Q	63	0.001
E1150D	5746	0.048	L113T	14	0
E1150K	403	0.003	L139F	26381	0.22
E1150Q	770	0.006	L161F	6348	0.053
E1150V	64	0.001	L167del	93	0.001
E1151D	1110	0.009	L167F	3316	0.028
E1182D	328	0.003	L167S	133	0.001
E1182K	356	0.003	L219del	52	0
E1182Q	1132	0.009	L219F	4260	0.035
E1188D	1153	0.01	L219I	1111	0.009
E1188S	323	0.003	L221del	23	0
E1188V	187	0.002	L221F	2608	0.022
E1195D	286	0.002	L222del	20	0
E1195Q	1269	0.011	L223del	20	0
E1202Q	9362	0.078	L224del	22	0
E1207A	39	0	L224F	1079	0.009
E1207D	6030	0.05	L227del	33	0
E1258D	2574	0.021	L227stop	134	0.001
E1258Q	1079	0.009	L230del	40	0
E1262D	700	0.006	L230F	17741	0.148
E132A	628	0.005	L331F	2450	0.02
E132Q	648	0.005	L331M	352	0.003
E154G	600	0.005	L339del	123	0.001
E154Q	1015	0.008	L339F	649	0.005
E154S	1908	0.016	L382del	452	0.004
E156D	567	0.005	L395F	949	0.008
E156G	4109772	34.242	L45Y	1142	0.01
E156Q	267	0.002	L56F	1605	0.013
E169D	136	0.001	M101I	1810	0.015
E169del	1084	0.009	M101L	128	0.001
E180G	818	0.007	M210del	2258	0.019
E180K	1844	0.015	M210I	10390	0.087
E191Q	230	0.002	M210L	713	0.006
E224Q	1357	0.011	M210T	1219	0.01
E281del	156	0.001	M234C	229	0.002
E298del	162	0.001	M234del	76	0.001
E298stop	61	0.001	M234I	5924	0.049
E309del	178	0.001	M234V	1013	0.008
E309G	142	0.001	M317I	1730	0.014
E309K	486	0.004	M322I	5999	0.05
E324del	84	0.001	M322L	386	0.003
E324Q	747	0.006	M322T	511	0.004
E406del	131	0.001	M322V	1919	0.016
E406Q	440	0.004	N11D	117	0.001
E465D	234	0.002	N11I	265	0.002
E465del	164	0.001	N11S	821	0.007
E471del	222	0.002	N140T	543	0.005
E471Q	1480	0.012	N192D	363	0.003
E484A	5611902	46.757	N192del	108	0.001
E484del	1057	0.009	N192K	210	0.002
E484K	166691	1.389	N192S	214	0.002
E484stop	15	0	N196del	280	0.002
E516del	92	0.001	N196I	469	0.004
E516L	17	0	N196S	689	0.006
E516Q	1246	0.01	N213del	869	0.007
E554D	1215	0.01	N213K	118	0.001
E554G	4073	0.034	N213T	390	0.003
E554K	287	0.002	N228del	44	0
E554Q	2376	0.02	N228T	179	0.001
E583D	10466	0.087	N269del	61	0.001
E583Q	1345	0.011	N27D	465	0.004
E619del	103	0.001	N29D	578	0.005
E619K	539	0.004	N29S	1161	0.01
E619Q	873	0.007	N29T	422	0.004
E654A	404	0.003	N29Y	810	0.007
E654K	1763	0.015	N345K	87	0.001
E654Q	1203	0.01	N354T	498	0.004
E654V	1233	0.01	N48S	661	0.006
E661D	8173	0.068	N8D	5973	0.05
E702D	239	0.002	N8S	1347	0.011
E702K	1206	0.01	N8Y	447	0.004
E702Q	575	0.005	P122L	4153	0.035
E702V	572	0.005	P122S	1261	0.011
E725D	148	0.001	P13L	5852496	48.762
E748del	118	0.001	P13S	6203	0.052
E748Q	649	0.005	P13T	2330	0.019
E780Q	787	0.007	P142L	812	0.007
E780S	79	0.001	P142Q	340	0.003
E819del	119	0.001	P142S	12410	0.103
E96D	1849	0.015	P151L	15874	0.132
E96Q	604	0.005	P151S	175030	1.458
F1042L	179	0.001	P168del	82	0.001
F1052C	365	0.003	P168S	6799	0.057
F1052L	489	0.004	P199del	90	0.001
F1062L	386	0.003	P199L	1096	0.009
F1062S	88	0.001	P199S	7364	0.061
F1075L	590	0.005	P207del	2503	0.021
F1075S	55	0	P20L	2447	0.02
F1089del	178	0.001	P20S	1246	0.01
F1089L	111	0.001	P258del	128	0.001
F1095L	306	0.003	P258L	725	0.006
F1103L	651	0.005	P258S	382	0.003
F1109del	55	0	P279L	1725	0.014
F1220L	152	0.001	P279Q	8022	0.067
F140del	1703	0.014	P279S	5112	0.043
F140L	622	0.005	P302S	1061	0.009
F157del	4129128	34.403	P326L	4629	0.039
F157L	20083	0.167	P326S	11647	0.097
F157S	3834	0.032	P344S	1911	0.016
F168del	1074	0.009	P364L	4125	0.034
F168S	70	0.001	P364S	2589	0.022
F186L	1619	0.013	P365L	19687	0.164
F186S	3320	0.028	P365S	7590	0.063
F201L	664	0.006	P365T	383	0.003
F220del	383	0.003	P368A	114	0.001
F238del	192	0.002	P368L	2232	0.019
F275del	98	0.001	P368S	1653	0.014
F275I	124	0.001	P383L	13028	0.109
F275L	250	0.002	P383S	11259	0.094
F2L	1045	0.009	P383T	607	0.005
F306del	180	0.001	P396S	468	0.004
F306L	1735	0.014	P46L	463	0.004
F318del	186	0.002	P46S	7282	0.061
F318L	152	0.001	P67del	1082	0.009
F318N	26	0	P67H	705	0.006
F329del	48	0	P67L	4193	0.035
F32L	748	0.006	P67S	44249	0.369
F338L	1352	0.011	P67T	272	0.002
F392del	226	0.002	P6H	490	0.004
F400del	134	0.001	P6L	8439	0.07
F400L	42	0	P6S	1559	0.013
F429del	175	0.001	P6T	3286	0.027
F456del	178	0.001	P80del	937	0.008
F456L	793	0.007	P80L	693	0.006
F464del	183	0.002	P80Q	1721	0.014
F464L	640	0.005	P80R	128720	1.072
F486del	1021	0.009	Q160R	101	0.001
F486L	191	0.002	Q163E	236	0.002
F490del	373	0.003	Q163R	318	0.003
F490L	2222	0.019	Q181R	281	0.002
F490S	7786	0.065	Q229del	46	0
F490V	529	0.004	Q229H	11379	0.095
F490Y	225	0.002	Q229S	179	0.001
F497del	456	0.004	Q239del	1312	0.011
F4L	108	0.001	Q239H	1646	0.014
F515del	74	0.001	Q239L	243	0.002
F515L	99	0.001	Q239N	277	0.002
F543L	116	0.001	Q239R	138	0.001
F58L	144	0.001	Q240del	393	0.003
F643L	16478	0.137	Q240K	306	0.003
F65del	1009	0.008	Q241R	204	0.002
F65L	213	0.002	Q242K	377	0.003
F782C	83	0.001	Q242L	357	0.003
F797C	87	0.001	Q242R	407	0.003
F797del	71	0.001	Q244H	2803	0.023
F800del	66	0.001	Q244L	609	0.005
F802del	60	0	Q260H	353	0.003
F817del	74	0.001	Q260L	904	0.008
F817L	347	0.003	Q272del	40	0
F823del	95	0.001	Q281H	434	0.004
F855L	524	0.004	Q281K	728	0.006
F855S	712	0.006	Q281L	1050	0.009
F86I	680	0.006	Q283W	136	0.001
F888L	562	0.005	Q289H	10045	0.084
F906del	180	0.001	Q28H	2332	0.019
F970del	65	0.001	Q294K	920	0.008
G1044E	376	0.003	Q294L	583	0.005
G1046A	384	0.003	Q306L	560	0.005
G1059L	393	0.003	Q349R	118	0.001
G1059W	137	0.001	Q380H	246	0.002
G1085A	1102	0.009	Q380K	655	0.005
G1085E	804	0.007	Q380L	1180	0.01
G1085R	1898	0.016	Q380R	287	0.002
G1085V	324	0.003	Q384H	3242	0.027
G1099D	1347	0.011	Q384Y	410	0.003
G1124C	542	0.005	Q386H	1668	0.014
G1124S	355	0.003	Q386R	527	0.004
G1124V	17667	0.147	Q389H	9059	0.075
G1131A	512	0.004	Q389L	357	0.003
G1167R	289	0.002	Q389R	499	0.004
G1167V	14343	0.12	Q390H	295	0.002
G1171D	238	0.002	Q390L	527	0.004
G1171V	1001	0.008	Q390N	408	0.003
G1219C	10508	0.088	Q39L	2099	0.017
G1219V	13537	0.113	Q39N	1050	0.009
G1223S	345	0.003	Q409K	334	0.003
G1223V	96	0.001	Q409L	1053	0.009
G1246S	583	0.005	Q409R	1845	0.015
G1251E	460	0.004	Q418H	6671	0.056
G1251R	1387	0.012	Q418L	902	0.008
G1251V	4113	0.034	Q43K	1217	0.01
G1267R	1002	0.008	Q58del	81	0.001
G1267V	549	0.005	Q70K	185	0.002
G142D	8779612	73.15	Q7H	537	0.004
G142del	6153	0.051	Q7K	4266	0.036
G142S	173	0.001	Q9H	11726	0.098
G142V	3232	0.027	Q9L	321505	2.679
G181A	3949	0.033	R10P	1068	0.009
G181del	336	0.003	R10Q	1390	0.012
G181R	4296	0.036	R149C	7	0
G181V	36409	0.303	R14C	10115	0.084
G184S	1486	0.012	R14H	1992	0.017
G184V	1831	0.015	R14L	2625	0.022
G199C	55	0	R177del	51	0
G219D	1061	0.009	R177G	133	0.001
G219del	378	0.003	R177I	71	0.001
G219S	1443	0.012	R185C	1625	0.014
G219V	540	0.004	R189H	798	0.007
G232C	736	0.006	R191C	366	0.003
G252D	1415	0.012	R191del	59	0
G252del	324	0.003	R191L	999	0.008
G252S	984	0.008	R195del	367	0.003
G252V	1064	0.009	R195I	7997	0.067
G257D	3258	0.027	R195K	1311	0.011
G257del	471	0.004	R195S	336	0.003
G261C	1111	0.009	R195T	1728	0.014
G261D	1352	0.011	R203del	1346	0.011
G261del	512	0.004	R203K	7154689	59.611
G261R	917	0.008	R203M	4426508	36.881
G268del	152	0.001	R203Q	202	0.002
G283del	186	0.002	R209del	4344	0.036
G311del	282	0.002	R209I	7308	0.061
G311R	277	0.002	R209K	1198	0.01
G339D	5769697	48.072	R209T	899	0.007
G339S	528	0.004	R226D	134	0.001
G339V	156	0.001	R226del	26	0
G35C	140	0.001	R226K	220	0.002
G35R	376	0.003	R226S	17	0
G381del	254	0.002	R259del	95	0.001
G404del	148	0.001	R276K	409	0.003
G404S	185	0.002	R277T	149	0.001
G413A	41	0	R293G	45	0
G413del	143	0.001	R293K	171	0.001
G413R	218	0.002	R319H	2906	0.024
G416del	145	0.001	R32H	2197	0.018
G431del	197	0.002	R36D	1014	0.008
G446del	207	0.002	R36Q	1964	0.016
G446S	1793897	14.946	R385I	1973	0.016
G446V	14478	0.121	R385T	171	0.001
G447del	267	0.002	R40C	3923	0.033
G476del	353	0.003	R40H	2100	0.017
G476S	2669	0.022	R40L	2488	0.021
G482del	490	0.004	R40V	1046	0.009
G482S	921	0.008	R41G	1066	0.009
G482V	218	0.002	R41L	2632	0.022
G485del	1038	0.009	R41Q	2360	0.02
G485V	281	0.002	R41W	618	0.005
G496del	455	0.004	R68del	1143	0.01
G496S	2169698	18.077	R68L	905	0.008
G502del	636	0.005	R68P	350	0.003
G504del	611	0.005	R89I	450	0.004
G526del	83	0.001	R95C	538	0.004
G601del	66	0.001	R95L	754	0.006
G639del	89	0.001	S105L	124	0.001
G639S	225	0.002	S176del	52	0
G639V	166	0.001	S180del	84	0.001
G667S	161	0.001	S180I	1883	0.016
G72del	1875	0.016	S187L	1382	0.012
G72E	2919	0.024	S193C	181	0.002
G72R	1028	0.009	S193del	57	0
G72V	1445	0.012	S193I	10271	0.086
G744del	135	0.001	S193N	830	0.007
G744S	395	0.003	S193R	222	0.002
G757A	134	0.001	S193T	2663	0.022
G757W	78	0.001	S194A	85	0.001
G75C	234	0.002	S194del	77	0.001
G75D	750	0.006	S194L	9282	0.077
G75del	678	0.006	S197A	103	0.001
G75R	1015	0.008	S197del	271	0.002
G75S	1058	0.009	S197L	2329	0.019
G75V	10521	0.088	S197P	548	0.005
G769A	479	0.004	S201del	84	0.001
G769R	221	0.002	S201I	247	0.002
G769V	4149	0.035	S201N	1017	0.008
G798del	100	0.001	S202C	1241	0.01
G799D	35	0	S202del	529	0.004
G799del	81	0.001	S202L	59	0
G799S	107	0.001	S202N	393	0.003
G799V	136	0.001	S206del	2432	0.02
G838C	25	0	S206P	1149	0.01
G842D	440	0.004	S206Y	233	0.002
G857A	164	0.001	S21Q	123	0.001
G885del	165	0.001	S232A	185	0.002
G891D	252	0.002	S232del	54	0
G932D	595	0.005	S232N	696	0.006
G932S	473	0.004	S232R	829	0.007
G946E	332	0.003	S235del	551	0.005
G946V	1313	0.011	S235F	1176621	9.803
G971del	76	0.001	S235L	922	0.008
H1048del	406	0.003	S23L	1524	0.013
H1048S	138	0.001	S23P	3160	0.026
H1058S	137	0.001	S250F	1040	0.009
H1058Y	2385	0.02	S26C	520	0.004
H1064A	199	0.002	S26I	2040	0.017
H1101Q	908	0.008	S2F	153	0.001
H1101Y	14238	0.119	S310N	567	0.005
H1159R	1005	0.008	S327L	90230	0.752
H1159Y	709	0.006	S33I	7517	0.063
H1271Y	109	0.001	S37L	407	0.003
H146del	4908	0.041	S37P	5390	0.045
H146N	332	0.003	S37Q	1023	0.009
H146Q	6680	0.056	S410F	143	0.001
H146T	2375	0.02	S412I	2502	0.021
H146Y	5149	0.043	S412N	1680	0.014
H245del	808	0.007	S412R	23025	0.192
H245P	45	0	S413G	537	0.004
H245Y	7011	0.058	S413I	8014	0.067
H49Y	12390	0.103	S416L	4813	0.04
H519del	92	0.001	S79G	204	0.002
H519Q	140	0.001	S79I	1230	0.01
H625Y	474	0.004	T115del	170	0.001
H655Y	6204146	51.692	T135I	37658	0.314
H66del	1041	0.009	T135N	802	0.007
H66Q	170	0.001	T141I	7115	0.059
H69D	107	0.001	T148A	405	0.003
H69del	4811660	40.09	T148I	573	0.005
H69Y	8311	0.069	T165I	2207	0.018
I1018L	85	0.001	T165L	20	0
I1018V	350	0.003	T166I	6013	0.05
I1114T	3773	0.031	T16M	2472	0.021
I1114V	1299	0.011	T198del	77	0.001
I1115L	110	0.001	T198I	2307	0.019
I1130M	790	0.007	T205A	212	0.002
I1132V	2136	0.018	T205del	2778	0.023
I1172M	164	0.001	T205I	47877	0.399
I1179L	176	0.001	T245I	1627	0.014
I1179V	1789	0.015	T245P	385	0.003
I1183L	486	0.004	T24A	1142	0.01
I1183V	782	0.007	T24I	10470	0.087
I1198V	315	0.003	T265I	4270	0.036
I1210T	343	0.003	T271del	55	0
I1210V	783	0.007	T271I	11693	0.097
I1216T	929	0.008	T271S	289	0.002
I1216V	779	0.006	T282F	131	0.001
I1221V	1031	0.009	T282I	4524	0.038
I1225F	130	0.001	T296I	7153	0.06
I1227V	662	0.006	T325A	210	0.002
I1232F	319	0.003	T325I	4749	0.04
I128V	1177	0.01	T329M	411	0.003
I197T	226	0.002	T329N	356	0.003
I197V	1751	0.015	T334A	643	0.005
I210del	3324	0.028	T334del	187	0.002
I210T	1987	0.017	T334I	8478	0.071
I231T	594	0.005	T334R	204	0.002
I233F	60	0	T362I	32136	0.268
I233L	281	0.002	T362K	7443	0.062
I233V	7848	0.065	T362N	116	0.001
I235del	191	0.002	T366A	692	0.006
I285del	181	0.002	T366I	19281	0.161
I285L	142	0.001	T366K	156	0.001
I312del	496	0.004	T366N	110	0.001
I326del	72	0.001	T379I	17416	0.145
I402del	140	0.001	T379L	420	0.003
I402M	81	0.001	T379N	853	0.007
I410del	187	0.002	T379S	327	0.003
I418del	209	0.002	T391I	8643	0.072
I434del	167	0.001	T391N	183	0.002
I468del	157	0.001	T391S	474	0.004
I472del	183	0.002	T393I	1411	0.012
I584V	983	0.008	T417A	171	0.001
I624T	55	0	T417I	5964	0.05
I666V	503	0.004	T49I	7923	0.066
I670V	4242	0.035	T49N	597	0.005
I68del	2937	0.024	T91N	128	0.001
I68L	573	0.005	V158L	875	0.007
I68T	19940	0.166	V246I	754	0.006
I692F	540	0.004	V270del	57	0
I714L	314	0.003	V270L	25081	0.209
I726del	76	0.001	V324I	545	0.005
I742V	303	0.003	V350F	1490	0.012
I794del	84	0.001	V392L	1940	0.016
I794N	1402	0.012	V72I	4653	0.039
I805del	59	0	V72L	1018	0.008
I818L	110	0.001	W330C	113	0.001
I818V	2546	0.021	W330L	6451	0.054
I834F	126	0.001	Y109del	188	0.002
I834V	4436	0.037	Y109F	180	0.001
I844V	1702	0.014	Y111del	192	0.002
I850F	136	0.001	Y112del	203	0.002
I850V	609	0.005	Y268del	81	0.001
I870S	49	0	Y298L	306	0.003
I870V	1529	0.013	Y333del	190	0.002
I909V	1446	0.012
I934V	966	0.008
I973del	76	0.001
I980L	41	0
ins1184ASMRLPRIstopM	255	0.002
ins150V	1884	0.016
ins152K	1883	0.016
ins157ILV	275	0.002
ins5F	187	0.002
ins735stopI	79	0.001
K1038R	306	0.003
K1045N	781	0.007
K1045R	729	0.006
K1073N	10905	0.091
K1073R	302	0.003
K113N	577	0.005
K113R	817	0.007
K1154E	130	0.001
K1157N	1013	0.008
K1181N	771	0.006
K1181T	284	0.002
K1191N	50213	0.418
K1205N	1838	0.015
K1205Q	27	0
K1205R	426	0.004
K1245N	726	0.006
K1245R	521	0.004
K1266E	98	0.001
K1266R	1738	0.014
K129R	89	0.001
K147del	841	0.007
K147E	13741	0.114
K147I	707	0.006
K150del	2291	0.019
K150E	400	0.003
K150N	1725	0.014
K150R	396	0.003
K182E	749	0.006
K187Q	621	0.005
K195R	430	0.004
K202N	238	0.002
K206A	269	0.002
K278del	109	0.001
K300del	170	0.001
K304del	178	0.001
K304R	160	0.001
K310del	199	0.002
K356R	4386	0.037
K378N	284	0.002
K386del	162	0.001
K417del	145	0.001
K417N	5028798	41.899
K417T	152186	1.268
K424del	166	0.001
K444del	183	0.002
K444E	79	0.001
K444N	6010	0.05
K444R	5449	0.045
K458del	189	0.002
K458N	469	0.004
K462del	206	0.002
K528del	56	0
K529del	49	0
K529N	355	0.003
K558N	4254	0.035
K558R	383	0.003
K558S	293	0.002
K733R	116	0.001
K77N	1341	0.011
K77R	359	0.003
K786E	120	0.001
K786T	122	0.001
K790N	249	0.002
K795del	94	0.001
K795N	493	0.004
K795R	1265	0.011
K811del	76	0.001
K811N	126	0.001
K814del	90	0.001
K814R	481	0.004
K825E	53	0
K825T	51	0
K854N	6631	0.055
K921E	63	0.001
K947R	220	0.002
K97E	10955	0.091
K97N	3169	0.026
L1004del	77	0.001
L1012S	88	0.001
L1024F	405	0.003
L1034I	83	0.001
L1049I	2945	0.025
L1049S	138	0.001
L1063F	3880	0.032
L1141F	13879	0.116
L118F	2063	0.017
L1197F	244	0.002
L1197M	314	0.003
L1200F	1578	0.013
L1203F	2416	0.02
L1224F	1001	0.008
L1224S	314	0.003
L1224V	60	0
L1234F	830	0.007
L1244F	939	0.008
L1265F	13577	0.113
L141del	3575	0.03
L141F	2788	0.023
L141W	471	0.004
L176F	16213	0.135
L179F	1403	0.012
L179I	519	0.004
L18F	173482	1.445
L212C	498	0.004
L212del	2260	0.019
L212S	15627	0.13
L216F	8781	0.073
L216V	23	0
L223I	56	0
L226F	242	0.002
L229F	1184	0.01
L241del	4122	0.034
L241F	74	0.001
L242del	42044	0.35
L244del	41351	0.345
L244F	444	0.004
L244S	2024	0.017
L249del	165	0.001
L249F	2330	0.019
L24S	4510	0.038
L270del	142	0.001
L270F	40	0
L270S	238	0.002
L276del	102	0.001
L276I	143	0.001
L276N	6	0
L276S	310	0.003
L277del	109	0.001
L277I	346	0.003
L293del	168	0.001
L293F	377	0.003
L296del	174	0.001
L303del	178	0.001
L303F	619	0.005
L303I	99	0.001
L387del	142	0.001
L390del	144	0.001
L390F	171	0.001
L425del	173	0.001
L425V	31	0
L452del	190	0.002
L452R	5610833	46.748
L455del	183	0.002
L455F	3456	0.029
L461del	212	0.002
L461J	26	0
L492del	388	0.003
L513del	76	0.001
L513F	414	0.003
L517del	73	0.001
L517F	946	0.008
L517I	251	0.002
L517Y	19	0
L518del	99	0.001
L54F	10424	0.087
L552V	42	0
L582F	423	0.004
L585F	1353	0.011
L5F	169495	1.412
L611F	92	0.001
L629I	253	0.002
L650F	49	0
L752V	162	0.001
L753F	75	0.001
L754V	103	0.001
L767F	46	0
L7F	119	0.001
L806del	61	0.001
L821del	158	0.001
L822del	104	0.001
L822F	3117	0.026
L828F	178	0.001
L849F	413	0.003
L849I	189	0.002
L84I	2355	0.02
L864del	123	0.001
L8F	3173	0.026
L916F	20	0
L922F	3526	0.029
L938F	10535	0.088
L938I	376	0.003
L977del	72	0.001
L981F	2467093	20.555
M1050I	1674	0.014
M1050Y	138	0.001
M1229I	10665	0.089
M1229L	300	0.002
M1229T	516	0.004
M1229V	415	0.003
M1233L	203	0.002
M1233T	355	0.003
M1237I	14191	0.118
M1237T	924	0.008
M1237V	1306	0.011
M153I	15925	0.133
M153K	367	0.003
M153V	3455	0.029
M177I	13905	0.116
M177T	1210	0.01
M177V	4818	0.04
M177W	381	0.003
M697I	343	0.003
M697T	60	0
M731I	1979	0.016
M731L	246	0.002
M740F	118	0.001
M740I	2342	0.02
M740T	1694	0.014
M740V	2217	0.018
M900I	290	0.002
M900L	41	0
M902I	249	0.002
N1074E	227	0.002
N1074Y	124	0.001
N1158S	178	0.001
N1187K	119	0.001
N1187S	1030	0.009
N1187Y	969	0.008
N1194del	419	0.003
N121D	94	0.001
N122K	551	0.005
N137D	193	0.002
N148del	724	0.006
N148K	360	0.003
N148S	1597	0.013
N148T	7798	0.065
N148Y	543	0.005
N149D	219	0.002
N149del	756	0.006
N149T	2503	0.021
N164del	2338	0.019
N164H	465	0.004
N165del	2353	0.02
N165K	30	0
N165M	244	0.002
N17D	270	0.002
N17del	406	0.003
N185D	3354	0.028
N185del	337	0.003
N185I	302	0.003
N185S	698	0.006
N188I	309	0.003
N188T	334	0.003
N211del	2153707	17.944
N211K	789	0.007
N234K	365	0.003
N280del	128	0.001
N280stop	160	0.001
N282D	57	0
N282del	182	0.002
N282H	77	0.001
N30del	245	0.002
N30H	651	0.005
N30S	388	0.003
N30T	44	0
N317del	190	0.002
N334K	458	0.004
N354D	1195	0.01
N354K	3656	0.03
N388del	143	0.001
N394del	261	0.002
N422del	131	0.001
N437del	176	0.001
N439K	532	0.004
N440K	4857883	40.475
N448del	214	0.002
N448S	271	0.002
N450D	5687	0.047
N450del	175	0.001
N460K	16514	0.138
N481del	382	0.003
N487del	381	0.003
N501del	565	0.005
N501Y	6824312	56.859
N536K	110	0.001
N540D	188	0.002
N556D	86	0.001
N556K	2314	0.019
N603del	32	0
N606S	542	0.005
N616del	77	0.001
N616L	23	0
N641Y	83	0.001
N657Y	224	0.002
N658S	67190	0.56
N658Y	245	0.002
N679del	140	0.001
N679H	93	0.001
N679K	6065326	50.535
N679S	676	0.006
N679Y	348	0.003
N703S	543	0.005
N709K	60	0
N709Y	38	0
N710S	100	0.001
N710T	64	0.001
N74del	1132	0.009
N74Y	366	0.003
N751del	111	0.001
N764K	5677752	47.306
N801del	72	0.001
N801stop	157	0.001
N81S	123	0.001
N824del	78	0.001
N856K	2465590	20.543
N856S	469	0.004
N907S	123	0.001
N969K	5959346	49.652
P1057Q	392	0.003
P1057T	143	0.001
P1069S	463	0.004
P1079S	2325	0.019
P1079T	982	0.008
P1090del	176	0.001
P1090L	51	0
P1112del	48	0
P1112L	363	0.003
P1112Q	323	0.003
P1112S	454	0.004
P1143L	3298	0.027
P1143S	2425	0.02
P1162L	21228	0.177
P1162S	20591	0.172
P1263L	14326	0.119
P1263Q	4776	0.04
P1263R	1460	0.012
P1263S	1673	0.014
P139del	1319	0.011
P139H	635	0.005
P174L	848	0.007
P174S	7732	0.064
P209del	367	0.003
P209H	188	0.002
P209L	1730	0.014
P217L	1381	0.012
P230L	148	0.001
P230S	172	0.001
P251del	243	0.002
P251L	43572	0.363
P251S	691	0.006
P25H	225	0.002
P25L	1842	0.015
P25S	3845	0.032
P25T	2048	0.017
P26L	5188	0.043
P26S	135705	1.131
P272del	119	0.001
P272L	2237	0.019
P272T	402	0.003
P295del	182	0.002
P322del	102	0.001
P330L	446	0.004
P330S	1902	0.016
P337S	553	0.005
P384del	238	0.002
P384L	3318	0.028
P384S	1571	0.013
P39S	240	0.002
P412del	156	0.001
P426del	179	0.001
P463del	328	0.003
P479del	997	0.008
P479L	1524	0.013
P479S	4938	0.041
P491del	388	0.003
P499del	522	0.004
P507del	230	0.002
P521Q	170	0.001
P521S	552	0.005
P527del	74	0.001
P561S	666	0.006
P600S	30	0
P621H	86	0.001
P621L	232	0.002
P621S	1934	0.016
P631L	227	0.002
P631S	2086	0.017
P665S	49	0
P681H	7238303	60.308
P681L	645	0.005
P681R	4493815	37.442
P728L	284	0.002
P792L	371	0.003
P792S	530	0.004
P792T	260	0.002
P793del	89	0.001
P793L	751	0.006
P793Q	332	0.003
P793S	1165	0.01
P807del	79	0.001
P807L	434	0.004
P807Q	133	0.001
P807S	1142	0.01
P807T	279	0.002
P809del	78	0.001
P809H	47	0
P809L	1854	0.015
P809S	22846	0.19
P809T	272	0.002
P812del	85	0.001
P812L	8551	0.071
P812Q	149	0.001
P812S	9785	0.082
P85T	332	0.003
P862Q	29	0
P862S	233	0.002
P863del	144	0.001
P863S	120	0.001
P9L	3829	0.032
P9S	1800	0.015
Q1005H	676	0.006
Q1054S	528	0.004
Q1071T	214	0.002
Q1113del	45	0
Q1142L	232	0.002
Q1180K	936	0.008
Q1201H	1332	0.011
Q1201K	4726	0.039
Q1201L	1807	0.015
Q1208E	534	0.004
Q1208H	4676	0.039
Q14H	7396	0.062
Q14K	46	0
Q14R	902	0.008
Q173S	533	0.004
Q183E	595	0.005
Q183H	1671	0.014
Q183R	1205	0.01
Q218H	1789	0.015
Q218K	270	0.002
Q218R	955	0.008
Q239del	171	0.001
Q271del	130	0.001
Q271K	265	0.002
Q271L	132	0.001
Q314del	229	0.002
Q314K	1350	0.011
Q321del	151	0.001
Q321P	139	0.001
Q409del	214	0.002
Q409R	13	0
Q414del	137	0.001
Q414R	4091	0.034
Q474del	251	0.002
Q493del	394	0.003
Q493R	4305274	35.871
Q498del	563	0.005
Q498R	5475924	45.624
Q506del	264	0.002
Q52H	2367	0.02
Q52K	356	0.003
Q564H	66	0.001
Q580H	584	0.005
Q580L	161	0.001
Q607H	975	0.008
Q613del	74	0.001
Q613E	1673	0.014
Q613H	59117	0.493
Q675del	119	0.001
Q675H	21274	0.177
Q675R	863	0.007
Q677del	134	0.001
Q677H	48422	0.403
Q677K	98	0.001
Q677R	749	0.006
Q690H	402	0.003
Q690R	158	0.001
Q755A	62	0.001
Q755N	120	0.001
Q762N	170	0.001
Q779K	1708	0.014
Q779L	239	0.002
Q779P	56	0
Q779R	413	0.003
Q787H	2244	0.019
Q787K	1687	0.014
Q787L	82	0.001
Q804del	53	0
Q804P	47	0
Q804T	111	0.001
Q836H	483	0.004
Q836L	891	0.007
Q913H	474	0.004
Q954H	5945683	49.538
Q957H	110	0.001
Q957R	194	0.002
R1014T	510	0.004
R102G	380	0.003
R102I	913	0.008
R102K	1611	0.013
R102S	305	0.003
R1039E	366	0.003
R1091C	307	0.003
R1091del	190	0.002
R1091H	2842	0.024
R1091L	1711	0.014
R1185C	374	0.003
R1185H	1074	0.009
R1185N	298	0.002
R158del	4116697	34.299
R158I	132	0.001
R190K	1127	0.009
R190S	121354	1.011
R214del	7734	0.064
R214H	6088	0.051
R214L	6860	0.057
R21I	6024	0.05
R21T	9813	0.082
R237del	588	0.005
R237K	1313	0.011
R246del	536	0.004
R246G	1054	0.009
R246I	1285	0.011
R246K	403	0.003
R246N	17	0
R246T	395	0.003
R273del	125	0.001
R273K	238	0.002
R273S	2755	0.023
R273stop	241	0.002
R319del	197	0.002
R319T	119	0.001
R346I	6971	0.058
R346K	1258569	10.486
R346S	4011	0.033
R346T	78317	0.653
R34C	54	0
R34L	683	0.006
R34P	446	0.004
R357K	2794	0.023
R403del	149	0.001
R403K	612	0.005
R408del	196	0.002
R408I	2052	0.017
R408L	71	0.001
R454del	173	0.001
R457del	189	0.002
R457S	80	0.001
R466del	169	0.001
R509del	99	0.001
R509K	37	0
R577C	113	0.001
R634L	659	0.005
R646H	1112	0.009
R646L	1232	0.01
R682Q	105	0.001
R682W	207	0.002
R683Q	1332	0.011
R683W	1675	0.014
R685H	57	0
R765C	1387	0.012
R765H	1611	0.013
R765L	2728	0.023
R78K	1913	0.016
R78M	1695	0.014
R78S	1881	0.016
R815del	91	0.001
R815G	54	0
R815K	288	0.002
R847del	81	0.001
R847I	98	0.001
R847T	387	0.003
S1021F	412	0.003
S1051L	363	0.003
S1051V	142	0.001
S1055L	506	0.004
S1055V	130	0.001
S112L	77619	0.647
S1147L	4967	0.041
S1170F	878	0.007
S1170Y	490	0.004
S1175A	78	0.001
S1175L	104	0.001
S1239C	23	0
S1239G	219	0.002
S1239N	268	0.002
S1239T	468	0.004
S1242I	1555	0.013
S1242N	458	0.004
S1249F	233	0.002
S1252F	8335	0.069
S1252P	3698	0.031
S1261F	672	0.006
S12C	516	0.004
S12F	13504	0.113
S13I	1401	0.012
S151del	2337	0.019
S151G	2389	0.02
S151I	2466	0.021
S155N	239	0.002
S161A	470	0.004
S161del	2255	0.019
S162del	2286	0.019
S162L	302	0.003
S172del	941	0.008
S205F	365	0.003
S205stop	194	0.002
S221del	366	0.003
S221L	19645	0.164
S247del	297	0.002
S247I	553	0.005
S247N	2014	0.017
S247R	238	0.002
S254del	255	0.002
S254F	11206	0.093
S255del	419	0.003
S255F	21539	0.179
S256del	444	0.004
S256L	5495	0.046
S297del	189	0.002
S305del	180	0.001
S316del	200	0.002
S316F	50	0
S31del	237	0.002
S325del	84	0.001
S325P	15	0
S349P	474	0.004
S359N	480	0.004
S371A	89	0.001
S371F	3397474	28.307
S373L	1408	0.012
S373P	5630102	46.909
S383del	231	0.002
S399del	141	0.001
S438del	176	0.001
S443del	180	0.001
S469del	181	0.002
S469L	71	0.001
S46L	617	0.005
S477del	360	0.003
S477G	992	0.008
S477I	9893	0.082
S477N	5607701	46.722
S477R	734	0.006
S494del	413	0.003
S494P	8371	0.07
S50L	727	0.006
S514del	73	0.001
S514F	1255	0.01
S514T	345	0.003
S530del	38	0
S596del	17	0
S596I	208	0.002
S637F	148	0.001
S640del	157	0.001
S640F	11782	0.098
S659L	248	0.002
S673T	1059	0.009
S680F	7199	0.06
S680T	1938	0.016
S689I	3135	0.026
S689N	524	0.004
S689R	779	0.006
S689T	131	0.001
S691F	2071	0.017
S698L	3572	0.03
S704L	299225	2.493
S704T	108	0.001
S711F	167	0.001
S71del	5655	0.047
S71F	1421	0.012
S735A	355	0.003
S735Q	91	0.001
S746del	124	0.001
S750del	110	0.001
S758Q	82	0.001
S803del	55	0
S810A	310	0.003
S810del	74	0.001
S810L	857	0.007
S810Q	44	0
S813A	57	0
S813del	87	0.001
S813I	3912	0.033
S813N	1584	0.013
S813R	140	0.001
S816del	84	0.001
S816H	50	0
S884C	107	0.001
S884F	1965	0.016
S929del	53	0
S929I	2987	0.025
S929T	5741	0.048
S937L	629	0.005
S939F	18133	0.151
S939Y	286	0.002
S940F	6896	0.057
S940Y	116	0.001
S943G	188	0.002
S943I	710	0.006
S943P	3286	0.027
S943T	281	0.002
S94P	98	0.001
S974del	74	0.001
S975del	64	0.001
S982A	1178704	9.821
S98F	30174	0.251
T1006I	1798	0.015
T1009I	2880	0.024
T1027I	130661	1.089
T1027N	87	0.001
T1066D	209	0.002
T1076H	215	0.002
T1076I	1227	0.01
T1077N	230	0.002
T108N	98	0.001
T1100I	419	0.003
T1116A	76	0.001
T1116I	167	0.001
T1116N	1350	0.011
T1117I	13185	0.11
T1120I	1140	0.009
T1231A	1278	0.011
T1231S	1660	0.014
T1238I	1179	0.01
T1238S	44	0
T167I	86	0.001
T167L	303	0.003
T167S	275	0.002
T19I	3471877	28.927
T19K	498	0.004
T19R	4429684	36.907
T208A	522	0.004
T208S	103	0.001
T20I	9546	0.08
T20N	126394	1.053
T22A	139	0.001
T22I	13045	0.109
T236del	215	0.002
T240del	297	0.002
T240I	11187	0.093
T240P	328	0.003
T250del	184	0.002
T250I	25191	0.21
T259del	408	0.003
T274A	94	0.001
T274D	247	0.002
T274del	114	0.001
T274N	119	0.001
T284del	169	0.001
T286del	179	0.001
T299del	260	0.002
T299I	16384	0.137
T29A	23213	0.193
T29I	9711	0.081
T302del	174	0.001
T307del	186	0.002
T307I	5541	0.046
T315del	236	0.002
T323del	85	0.001
T323I	7266	0.061
T333I	195	0.002
T333K	62	0.001
T33I	7987	0.067
T33K	237	0.002
T376I	2032	0.017
T376S	625	0.005
T385del	229	0.002
T385I	3767	0.031
T393del	280	0.002
T393I	95	0.001
T415del	147	0.001
T430del	188	0.002
T430I	2057	0.017
T470del	219	0.002
T470I	1442	0.012
T478del	389	0.003
T478I	711	0.006
T478K	9994926	83.276
T500del	529	0.004
T51I	6384	0.053
T523A	605	0.005
T523N	128	0.001
T531del	32	0
T547I	13827	0.115
T547K	2494030	20.78
T553I	1600	0.013
T553L	144	0.001
T572I	25931	0.216
T572N	297	0.002
T573I	8435	0.07
T588I	632	0.005
T602del	47	0
T604I	2341	0.02
T604N	473	0.004
T618I	1962	0.016
T632S	560	0.005
T638I	1404	0.012
T638R	115	0.001
T63del	1059	0.009
T63I	137	0.001
T676del	134	0.001
T676I	4991	0.042
T678del	135	0.001
T678I	8478	0.071
T716I	1182627	9.853
T719I	15743	0.131
T719S	242	0.002
T723I	360	0.003
T723P	85	0.001
T724S	171	0.001
T732A	386	0.003
T732I	6478	0.054
T732P	180	0.001
T734H	81	0.001
T73A	294	0.002
T73del	1275	0.011
T747del	117	0.001
T747I	6901	0.057
T747S	49	0
T761I	515	0.004
T768N	1076	0.009
T76I	62294	0.519
T76S	446	0.004
T778A	968	0.008
T778I	1586	0.013
T791I	9770	0.081
T791K	371	0.003
T827I	1432	0.012
T859A	259	0.002
T859I	14317	0.119
T859N	4623	0.039
T874I	481	0.004
T883I	3794	0.032
T883N	16	0
T883S	192	0.002
T883V	78	0.001
T887del	150	0.001
T941I	190	0.002
T95I	4086905	34.051
T95N	431	0.004
T95S	380	0.003
T961M	2319	0.019
V1033A	608	0.005
V1040F	269	0.002
V1040L	382	0.003
V1060C	148	0.001
V1060M	395	0.003
V1061S	152	0.001
V1065A	259	0.002
V1065C	240	0.002
V1065L	930	0.008
V1068A	61	0.001
V1068C	215	0.002
V1068F	944	0.008
V1068I	764	0.006
V1094F	185	0.002
V1094I	656	0.005
V1096A	147	0.001
V1104I	1207	0.01
V1104L	67288	0.561
V1122L	6154	0.051
V1128L	723	0.006
V1129L	388	0.003
V1133F	1273	0.011
V1164F	328	0.003
V1176F	137461	1.145
V1177I	5305	0.044
V1177L	1494	0.012
V1189A	223	0.002
V1189I	658	0.005
V11A	157	0.001
V11F	246	0.002
V11I	966	0.008
V11L	48	0
V1228L	13477	0.112
V1230A	194	0.002
V1230L	1921	0.016
V1230M	445	0.004
V1264L	124979	1.041
V1264M	4623	0.039
V126F	136	0.001
V127F	1260	0.01
V143D	1479	0.012
V143del	2349071	19.572
V143F	2723	0.023
V159A	112	0.001
V159F	114	0.001
V159I	1081	0.009
V16F	6649	0.055
V171del	995	0.008
V171F	509	0.004
V171I	739	0.006
V171L	224	0.002
V193C	494	0.004
V193L	4406	0.037
V213del	417	0.003
V213L	3405	0.028
V227L	1414	0.012
V267del	145	0.001
V267L	871	0.007
V289del	191	0.002
V289I	48125	0.401
V289L	2187	0.018
V308del	187	0.002
V308I	1041	0.009
V308L	7049	0.059
V320del	213	0.002
V320F	774	0.006
V320L	482	0.004
V327del	80	0.001
V327L	261	0.002
V341I	334	0.003
V362F	829	0.007
V367A	403	0.003
V367F	1451	0.012
V367I	1343	0.011
V36F	22691	0.189
V36I	424	0.004
V382del	243	0.002
V382L	1788	0.015
V395del	231	0.002
V395F	86	0.001
V395I	141	0.001
V3G	72545	0.604
V401del	138	0.001
V407del	131	0.001
V407S	91	0.001
V433del	174	0.001
V445A	3740	0.031
V445del	209	0.002
V47F	636	0.005
V483del	1051	0.009
V483F	3493	0.029
V503del	613	0.005
V503F	806	0.007
V503I	357	0.003
V510del	84	0.001
V511del	75	0.001
V511L	95	0.001
V512del	76	0.001
V512I	118	0.001
V534I	411	0.003
V551F	673	0.006
V595I	822	0.007
V597del	19	0
V597I	939	0.008
V608F	134	0.001
V615del	78	0.001
V615I	1478	0.012
V620I	121	0.001
V622A	1077	0.009
V622F	9609	0.08
V622I	1445	0.012
V62del	957	0.008
V62F	100	0.001
V62I	1298	0.011
V62L	1516	0.013
V635del	66	0.001
V642F	529	0.004
V642G	1298	0.011
V656T	73	0.001
V687I	1538	0.013
V687L	1176	0.01
V6A	1929	0.016
V6F	9332	0.078
V6L	289	0.002
V705A	35	0
V705F	846	0.007
V705L	425	0.004
V70del	4814530	40.114
V70F	10204	0.085
V70I	30519	0.254
V70L	3047	0.025
V736del	68	0.001
V736I	706	0.006
V772A	243	0.002
V772I	1685	0.014
V785I	416	0.003
V826I	70	0.001
V826L	884	0.007
V83I	1464	0.012
V860F	243	0.002
V860L	571	0.005
V90F	1143	0.01
V90I	1092	0.009
V976del	56	0
V976G	17	0
V987F	600	0.005
V987I	50	0
W1102L	522	0.004
W152C	161	0.001
W152G	718	0.006
W152L	6168	0.051
W152R	32318	0.269
W258del	280	0.002
W258L	12643	0.105
W258R	5823	0.049
W258S	232	0.002
W436del	177	0.001
W64del	1067	0.009
W64L	3548	0.03
W64R	9377	0.078
W886del	153	0.001
W886L	776	0.006
Y1047del	412	0.003
Y1067L	215	0.002
Y1110del	53	0
Y1215H	292	0.002
Y144del	3499428	29.157
Y144F	2770	0.023
Y144H	1124	0.009
Y144I	642	0.005
Y144N	56	0
Y144T	122	0.001
Y145del	2345882	19.545
Y145H	145679	1.214
Y145N	476	0.004
Y145T	1958	0.016
Y160del	2898	0.024
Y160I	385	0.003
Y170del	1021	0.009
Y204F	403	0.003
Y248del	240	0.002
Y248H	8015	0.067
Y265del	159	0.001
Y265L	351	0.003
Y266del	231	0.002
Y266L	228	0.002
Y269del	144	0.001
Y279del	119	0.001
Y28H	1763	0.015
Y313del	472	0.004
Y369H	535	0.004
Y380del	154	0.001
Y38L	104	0.001
Y396del	227	0.002
Y421del	130	0.001
Y423del	138	0.001
Y449del	207	0.002
Y449H	1391	0.012
Y449N	1041	0.009
Y451del	163	0.001
Y453del	196	0.002
Y473del	190	0.002
Y473F	779	0.006
Y489del	377	0.003
Y489F	36	0
Y495del	430	0.004
Y505del	289	0.002
Y505H	5493263	45.769
Y508del	148	0.001
Y508H	1604	0.013
Y612del	72	0.001
Y636del	58	0
Y636F	125	0.001
Y660del	45	0
Y660H	476	0.004
Y674F	575	0.005
Y674H	122	0.001
Y741V	135	0.001
Y756I	71	0.001
Y837H	981	0.008
Y917stop	96	0.001
