# Supplementary material for: In Silico Genome Analysis Reveals the Evolution and Potential Impact of SARS-CoV-2 Omicron Structural Changes on Host Immune Evasion and Antiviral Therapeutics
Source: Viruses. 2022 Nov 6;14(11):2461. doi: 10.3390/v14112461 (PMC9697451; doi:10.3390/v14112461)
Supplement: Supplementary file 1 [file viruses-14-02461-s001.zip › Table_S5_10292022.xlsx]

## Sheet: Unique Structural mutation freq
Table S5 - Mutations, insertions, and deletions that are exclusively present in the structural proteins (Spike, Envelope, Membrane, and Nucleocapsid) of Omicron variant provided along with the frequency (%) of each change in 6,104,697 Omicron sequences
Spike	Count	Proportion (%)	Neucleocapsid	Count	Proportion (%)	Membrane	Count	Proportion (%)	Envelope	Count	Proportion (%)
A1015D	6	9.8285e-05	A119M	1	1.63808e-05	A104R	2	3.27617e-05	A22D	7	0.000114666
A1015H	2	3.27617e-05	A119W	1	1.63808e-05	A104W	2	3.27617e-05	A22H	1	1.63808e-05
A1015I	3	4.91425e-05	A125F	2	3.27617e-05	A104Y	2	3.27617e-05	A32N	1	1.63808e-05
A1015K	3	4.91425e-05	A125K	1	1.63808e-05	A142Q	1	1.63808e-05	A36K	1	1.63808e-05
A1015P	1	1.63808e-05	A125P	7	0.000114666	A152Q	6	9.8285e-05	A36N	2	3.27617e-05
A1016F	1	1.63808e-05	A125R	3	4.91425e-05	A171D	5	8.19041e-05	A36stop	1	1.63808e-05
A1016G	1	1.63808e-05	A125W	1	1.63808e-05	A171E	3	4.91425e-05	A41D	1	1.63808e-05
A1016W	1	1.63808e-05	A12I	1	1.63808e-05	A171G	2	3.27617e-05	A41L	4	6.55233e-05
A1020H	1	1.63808e-05	A12M	5	8.19041e-05	A171M	1	1.63808e-05	C40K	1	1.63808e-05
A1020I	1	1.63808e-05	A12R	1	1.63808e-05	A171N	1	1.63808e-05	C40P	1	1.63808e-05
A1020Q	1	1.63808e-05	A12stop	1	1.63808e-05	A171R	2	3.27617e-05	C40Q	2	3.27617e-05
A1020R	1	1.63808e-05	A134F	3	4.91425e-05	A183C	2	3.27617e-05	C40R	9	0.000147427
A1020Y	1	1.63808e-05	A134H	1	1.63808e-05	A183D	1	1.63808e-05	C43Q	1	1.63808e-05
A1022H	1	1.63808e-05	A134N	4	6.55233e-05	A183E	3	4.91425e-05	C44N	1	1.63808e-05
A1022K	1	1.63808e-05	A138N	1	1.63808e-05	A183H	8	0.000131047	D72I	1	1.63808e-05
A1025E	1	1.63808e-05	A138W	5	8.19041e-05	A183M	1	1.63808e-05	E8P	1	1.63808e-05
A1025P	8	0.000131047	A156R	1	1.63808e-05	A183R	1	1.63808e-05	E8Y	1	1.63808e-05
A1025Y	2	3.27617e-05	A173H	1	1.63808e-05	A188C	1	1.63808e-05	E8Z	1	1.63808e-05
A1026E	1	1.63808e-05	A173M	1	1.63808e-05	A188D	1	1.63808e-05	F20P	1	1.63808e-05
A1026F	4	6.55233e-05	A182E	1	1.63808e-05	A188K	1	1.63808e-05	F23G	3	4.91425e-05
A1026H	1	1.63808e-05	A182G	2	3.27617e-05	A188Y	2	3.27617e-05	F23R	4	6.55233e-05
A1026J	1	1.63808e-05	A182I	1	1.63808e-05	A194F	1	1.63808e-05	F23T	2	3.27617e-05
A1026R	1	1.63808e-05	A182R	4	6.55233e-05	A194H	1	1.63808e-05	F26G	1	1.63808e-05
A1026stop	1	1.63808e-05	A208stop	1	1.63808e-05	A194R	1	1.63808e-05	F26P	1	1.63808e-05
A1026W	1	1.63808e-05	A208W	1	1.63808e-05	A194W	1	1.63808e-05	F56G	1	1.63808e-05
A1056C	4	6.55233e-05	A211F	1	1.63808e-05	A195K	2	3.27617e-05	F56N	1	1.63808e-05
A1056H	1	1.63808e-05	A220N	1	1.63808e-05	A218del	1	1.63808e-05	F56T	2	3.27617e-05
A1056Q	1	1.63808e-05	A251I	2	3.27617e-05	A218G	19	0.000311236	F56W	1	1.63808e-05
A1070D	2	3.27617e-05	A251W	1	1.63808e-05	A2I	1	1.63808e-05	G10D	6	9.8285e-05
A1070Y	1	1.63808e-05	A254I	2	3.27617e-05	A2K	1	1.63808e-05	I13F	1	1.63808e-05
A1078E	1	1.63808e-05	A254N	11	0.000180189	A38G	14	0.000229332	I13S	1	1.63808e-05
A1078N	2	3.27617e-05	A264Q	2	3.27617e-05	A38H	4	6.55233e-05	I13T	6	9.8285e-05
A1080H	1	1.63808e-05	A273Q	2	3.27617e-05	A38I	3	4.91425e-05	I33P	1	1.63808e-05
A1080I	1	1.63808e-05	A273stop	1	1.63808e-05	A38K	3	4.91425e-05	I46N	2	3.27617e-05
A1080L	10	0.000163808	A305D	1	1.63808e-05	A38M	4	6.55233e-05	I46R	1	1.63808e-05
A1080Q	2	3.27617e-05	A305E	5	8.19041e-05	A38N	4	6.55233e-05	ins16H	1	1.63808e-05
A1174D	8	0.000131047	A305M	1	1.63808e-05	A38Q	4	6.55233e-05	ins16R	1	1.63808e-05
A1174I	5	8.19041e-05	A308E	1	1.63808e-05	A38R	2	3.27617e-05	ins23R	1	1.63808e-05
A1174N	1	1.63808e-05	A308I	2	3.27617e-05	A38stop	8	0.000131047	ins24XXXX	1	1.63808e-05
A1222M	2	3.27617e-05	A308N	1	1.63808e-05	A38W	4	6.55233e-05	ins25ASYTSHPYCAS	2	3.27617e-05
A1222Y	1	1.63808e-05	A311I	1	1.63808e-05	A38Y	2	3.27617e-05	ins25EVKALD	1	1.63808e-05
A1226H	1	1.63808e-05	A311Q	1	1.63808e-05	A40I	1	1.63808e-05	ins26AAILLTstopVLstopN	1	1.63808e-05
A123E	1	1.63808e-05	A313C	1	1.63808e-05	A40L	1	1.63808e-05	ins26TstopVG	2	3.27617e-05
A123W	1	1.63808e-05	A313I	2	3.27617e-05	A40R	1	1.63808e-05	ins26TstopVGV	1	1.63808e-05
A163F	6	9.8285e-05	A313P	2	3.27617e-05	A40stop	2	3.27617e-05	ins26TstopVGVLLFLAFVXF	1	1.63808e-05
A163H	4	6.55233e-05	A313Q	2	3.27617e-05	A40Y	4	6.55233e-05	ins27FDC	1	1.63808e-05
A163M	6	9.8285e-05	A313stop	2	3.27617e-05	A63I	139	0.00227694	ins27LVTLAILTAXXVLLFLAFVVFL	1	1.63808e-05
A163N	9	0.000147427	A313W	3	4.91425e-05	A63W	2	3.27617e-05	ins27LVTLAILTGVLLFLAFVVFL	1	1.63808e-05
A222E	9	0.000147427	A336E	2	3.27617e-05	A68M	2	3.27617e-05	ins28FLAFVXXXX	1	1.63808e-05
A222H	2	3.27617e-05	A336N	1	1.63808e-05	A68W	2	3.27617e-05	ins28S	1	1.63808e-05
A222Q	4	6.55233e-05	A336W	1	1.63808e-05	A69D	9	0.000147427	ins28stop	2	3.27617e-05
A222Y	4	6.55233e-05	A35C	1	1.63808e-05	A69M	2	3.27617e-05	ins28SWstopSCL	2	3.27617e-05
A243H	1	1.63808e-05	A35K	99	0.0016217	A69R	2	3.27617e-05	ins31G	1	1.63808e-05
A243N	4	6.55233e-05	A35M	4	6.55233e-05	A69W	1	1.63808e-05	ins34LTstopVLstop	2	3.27617e-05
A260M	1	1.63808e-05	A35N	6	9.8285e-05	A81H	1	1.63808e-05	ins34XXXX	3	4.91425e-05
A260R	1	1.63808e-05	A376I	1	1.63808e-05	A81I	2	3.27617e-05	ins36HPRFD	1	1.63808e-05
A260W	2	3.27617e-05	A376N	1	1.63808e-05	A81N	3	4.91425e-05	ins36R	1	1.63808e-05
A262H	1	1.63808e-05	A381Q	2	3.27617e-05	A83E	1	1.63808e-05	ins38FVCV	2	3.27617e-05
A262Y	1	1.63808e-05	A397H	1	1.63808e-05	A85I	6	9.8285e-05	ins38IVCV	1	1.63808e-05
A263F	8	0.000131047	A397K	1	1.63808e-05	A85N	1	1.63808e-05	ins38stop	1	1.63808e-05
A263M	3	4.91425e-05	A397Y	1	1.63808e-05	A85W	2	3.27617e-05	ins39DRK	1	1.63808e-05
A263stop	4	6.55233e-05	A398F	1	1.63808e-05	A98stop	1	1.63808e-05	ins39G	2	3.27617e-05
A263W	1	1.63808e-05	A398I	1	1.63808e-05	A98W	1	1.63808e-05	ins39RFD	1	1.63808e-05
A264H	3	4.91425e-05	A398K	1	1.63808e-05	C33A	2	3.27617e-05	ins40QQEstop	10	0.000163808
A264M	5	8.19041e-05	A398stop	2	3.27617e-05	C33D	4	6.55233e-05	ins41LLLQ	2	3.27617e-05
A27D	19	0.000311236	A398W	1	1.63808e-05	C33H	1	1.63808e-05	ins41LQ	1	1.63808e-05
A27M	1	1.63808e-05	A414F	1	1.63808e-05	C33K	1	1.63808e-05	ins41VLLQ	1	1.63808e-05
A27N	1	1.63808e-05	A414Y	1	1.63808e-05	C33M	6	9.8285e-05	ins42C	2	3.27617e-05
A27R	5	8.19041e-05	A50C	9	0.000147427	C33P	2	3.27617e-05	ins42S	1	1.63808e-05
A27stop	5	8.19041e-05	A50E	2	3.27617e-05	C33T	3	4.91425e-05	ins44LL	2	3.27617e-05
A288E	4	6.55233e-05	A50I	1	1.63808e-05	C33W	2	3.27617e-05	ins44stopLHstopP	1	1.63808e-05
A288H	2	3.27617e-05	A50K	1	1.63808e-05	C64D	1	1.63808e-05	ins45K	1	1.63808e-05
A288Q	18	0.000294855	A50Q	14	0.000229332	C64M	2	3.27617e-05	ins46DEDDSEPV	1	1.63808e-05
A292D	2	3.27617e-05	A50stop	4	6.55233e-05	C64R	6	9.8285e-05	ins47TDLstopQY	1	1.63808e-05
A292N	3	4.91425e-05	A55D	76	0.00124494	C86A	3	4.91425e-05	ins48EP	1	1.63808e-05
A292Q	3	4.91425e-05	A55F	1	1.63808e-05	C86N	6	9.8285e-05	ins48stop	1	1.63808e-05
A292W	1	1.63808e-05	A55K	2	3.27617e-05	C86P	1	1.63808e-05	ins49CstopR	1	1.63808e-05
A292Y	5	8.19041e-05	A90C	1	1.63808e-05	D163stop	1	1.63808e-05	ins49LLQWLLT	1	1.63808e-05
A344E	1	1.63808e-05	A90E	3	4.91425e-05	D190I	4	6.55233e-05	ins52IFWSK	2	3.27617e-05
A344I	12	0.00019657	A90H	1	1.63808e-05	D190K	1	1.63808e-05	ins52K	1	1.63808e-05
A344M	2	3.27617e-05	A90I	1	1.63808e-05	D190P	1	1.63808e-05	ins54VTL	1	1.63808e-05
A344N	5	8.19041e-05	A90M	1	1.63808e-05	D209C	1	1.63808e-05	ins57R	1	1.63808e-05
A348H	3	4.91425e-05	A90Q	3	4.91425e-05	D209Z	2	3.27617e-05	ins60L	1	1.63808e-05
A348N	1	1.63808e-05	A90R	3	4.91425e-05	D215P	2	3.27617e-05	ins62L	1	1.63808e-05
A348Q	12	0.00019657	D103L	1	1.63808e-05	D215stop	1	1.63808e-05	ins6G	1	1.63808e-05
A348R	1	1.63808e-05	D128K	3	4.91425e-05	D3C	44	0.000720756	ins71D	1	1.63808e-05
A352P	3	4.91425e-05	D144W	1	1.63808e-05	D3I	15	0.000245712	ins71TQRS	1	1.63808e-05
A352Q	11	0.000180189	D216S	1	1.63808e-05	D3K	5	8.19041e-05	ins9I	1	1.63808e-05
A352R	1	1.63808e-05	D225Q	2	3.27617e-05	D3S	202	0.00330893	K53V	2	3.27617e-05
A352Y	1	1.63808e-05	D22M	2	3.27617e-05	D3T	6	9.8285e-05	K53W	1	1.63808e-05
A363D	4	6.55233e-05	D22Q	7	0.000114666	E115N	1	1.63808e-05	K63F	1	1.63808e-05
A363G	20	0.000327617	D22T	2	3.27617e-05	E115T	2	3.27617e-05	K63S	2	3.27617e-05
A363K	4	6.55233e-05	D288H	2	3.27617e-05	E115W	1	1.63808e-05	K63Y	1	1.63808e-05
A363R	1	1.63808e-05	D288Q	1	1.63808e-05	E115Z	6	9.8285e-05	L12J	1	1.63808e-05
A372F	1	1.63808e-05	D297C	1	1.63808e-05	E11F	1	1.63808e-05	L18S	2	3.27617e-05
A372K	1	1.63808e-05	D297I	2	3.27617e-05	E11L	3	4.91425e-05	L18Y	1	1.63808e-05
A372M	1	1.63808e-05	D297Q	1	1.63808e-05	E12I	1	1.63808e-05	L19H	1	1.63808e-05
A372N	1	1.63808e-05	D340F	2	3.27617e-05	E12L	1	1.63808e-05	L21C	2	3.27617e-05
A372Q	1	1.63808e-05	D340P	1	1.63808e-05	E135I	2	3.27617e-05	L27H	1	1.63808e-05
A372stop	3	4.91425e-05	D340stop	1	1.63808e-05	E135L	3	4.91425e-05	L27W	2	3.27617e-05
A397E	6	9.8285e-05	D341F	1	1.63808e-05	E137L	2	3.27617e-05	L28A	1	1.63808e-05
A397F	1	1.63808e-05	D341R	1	1.63808e-05	E137M	2	3.27617e-05	L28M	2	3.27617e-05
A397G	2	3.27617e-05	D343L	1	1.63808e-05	E167L	5	8.19041e-05	L31F	2	3.27617e-05
A397M	13	0.000212951	D343M	1	1.63808e-05	E18C	1	1.63808e-05	L34J	3	4.91425e-05
A411J	1	1.63808e-05	D348C	1	1.63808e-05	E18M	1	1.63808e-05	L34Q	1	1.63808e-05
A411K	2	3.27617e-05	D371F	2	3.27617e-05	F100N	1	1.63808e-05	L37D	1	1.63808e-05
A411M	1	1.63808e-05	D377I	3	4.91425e-05	F100P	2	3.27617e-05	L37J	5	8.19041e-05
A419D	6	9.8285e-05	D399M	1	1.63808e-05	F100W	6	9.8285e-05	L37Q	1	1.63808e-05
A419E	8	0.000131047	D399W	1	1.63808e-05	F103A	1	1.63808e-05	L37R	7	0.000114666
A419F	1	1.63808e-05	D3S	1	1.63808e-05	F103P	1	1.63808e-05	L37stop	1	1.63808e-05
A419Y	3	4.91425e-05	D401L	1	1.63808e-05	F103W	1	1.63808e-05	L39C	1	1.63808e-05
A435C	3	4.91425e-05	D401Q	1	1.63808e-05	F112D	1	1.63808e-05	L39D	2	3.27617e-05
A435E	1	1.63808e-05	D401T	1	1.63808e-05	F112G	1	1.63808e-05	L39E	1	1.63808e-05
A435H	1	1.63808e-05	D402F	1	1.63808e-05	F112M	1	1.63808e-05	L39N	1	1.63808e-05
A435Q	1	1.63808e-05	D402K	2	3.27617e-05	F112N	1	1.63808e-05	L39R	2	3.27617e-05
A435stop	1	1.63808e-05	D415S	9	0.000147427	F112R	1	1.63808e-05	L39W	3	4.91425e-05
A435Y	2	3.27617e-05	D63B	15	0.000245712	F193M	2	3.27617e-05	L51H	1	1.63808e-05
A475E	1	1.63808e-05	D63K	1	1.63808e-05	F193S	7	0.000114666	L51M	1	1.63808e-05
A475F	7	0.000114666	D63M	3	4.91425e-05	F26N	2	3.27617e-05	L51N	3	4.91425e-05
A475H	1	1.63808e-05	D63Q	1	1.63808e-05	F26Q	1	1.63808e-05	L65T	1	1.63808e-05
A475N	2	3.27617e-05	D81K	2	3.27617e-05	F26R	1	1.63808e-05	N15E	1	1.63808e-05
A475Q	6	9.8285e-05	D81Q	3	4.91425e-05	F26stop	2	3.27617e-05	N15L	1	1.63808e-05
A475stop	616	0.0100906	D82I	2	3.27617e-05	F26T	2	3.27617e-05	N45R	4	6.55233e-05
A475W	2	3.27617e-05	D82K	1	1.63808e-05	F28M	4	6.55233e-05	N48G	1	1.63808e-05
A475Y	1	1.63808e-05	D82P	11	0.000180189	F28N	3	4.91425e-05	N48P	1	1.63808e-05
A520I	3	4.91425e-05	D82Q	2	3.27617e-05	F37A	3	4.91425e-05	N48Q	1	1.63808e-05
A520K	6	9.8285e-05	D82S	2	3.27617e-05	F37E	3	4.91425e-05	N64B	4	6.55233e-05
A520N	3	4.91425e-05	D82V	1	1.63808e-05	F37H	2	3.27617e-05	N64F	2	3.27617e-05
A520Y	2	3.27617e-05	D98L	1	1.63808e-05	F37K	4	6.55233e-05	N64R	1	1.63808e-05
A522I	5	8.19041e-05	D98M	1	1.63808e-05	F37M	3	4.91425e-05	N66del	1	1.63808e-05
A522R	3	4.91425e-05	D98P	2	3.27617e-05	F37N	3	4.91425e-05	P54Y	1	1.63808e-05
A522Y	2	3.27617e-05	D98S	5	8.19041e-05	F37P	4	6.55233e-05	P71C	1	1.63808e-05
A570F	2	3.27617e-05	D98stop	8	0.000131047	F37R	6	9.8285e-05	R38C	12	0.00019657
A570K	1	1.63808e-05	E118N	3	4.91425e-05	F37stop	3	4.91425e-05	R38H	2	3.27617e-05
A570R	1	1.63808e-05	E118P	1	1.63808e-05	F37V	34	0.000556948	R38K	1	1.63808e-05
A609E	1	1.63808e-05	E118W	1	1.63808e-05	F37W	2	3.27617e-05	R38N	2	3.27617e-05
A609F	2	3.27617e-05	E118Y	1	1.63808e-05	F45C	4	6.55233e-05	R38Y	2	3.27617e-05
A609I	1	1.63808e-05	E136H	5	8.19041e-05	F45H	2	3.27617e-05	R61A	2	3.27617e-05
A609P	1	1.63808e-05	E136L	2	3.27617e-05	F45M	2	3.27617e-05	R61F	2	3.27617e-05
A647D	1	1.63808e-05	E136M	1	1.63808e-05	F45Q	1	1.63808e-05	R61K	1	1.63808e-05
A653I	1	1.63808e-05	E136T	2	3.27617e-05	F45W	4	6.55233e-05	R61Q	2	3.27617e-05
A653Q	1	1.63808e-05	E174G	2	3.27617e-05	F45Y	3	4.91425e-05	R69Q	3	4.91425e-05
A668C	1	1.63808e-05	E231L	3	4.91425e-05	F53H	3	4.91425e-05	R69stop	6	9.8285e-05
A668I	2	3.27617e-05	E253F	1	1.63808e-05	F53R	2	3.27617e-05	S16F	2	3.27617e-05
A668M	1	1.63808e-05	E280P	1	1.63808e-05	F53stop	1	1.63808e-05	S16L	2	3.27617e-05
A668N	1	1.63808e-05	E290C	1	1.63808e-05	F53T	1	1.63808e-05	S16Q	1	1.63808e-05
A67I	97	0.00158894	E290Y	1	1.63808e-05	F53W	1	1.63808e-05	S16V	1	1.63808e-05
A67stop	3	4.91425e-05	E31F	1	1.63808e-05	F65M	1	1.63808e-05	S3del	1	1.63808e-05
A684C	1	1.63808e-05	E31M	3	4.91425e-05	F65T	2	3.27617e-05	S3F	1	1.63808e-05
A684D	1	1.63808e-05	E31P	4	6.55233e-05	F96H	5	8.19041e-05	S50F	1	1.63808e-05
A684R	9	0.000147427	E31W	103	0.00168723	F96P	2	3.27617e-05	S50P	10	0.000163808
A688H	1	1.63808e-05	E323W	1	1.63808e-05	F96Q	1	1.63808e-05	S55I	2	3.27617e-05
A688N	2	3.27617e-05	E367H	1	1.63808e-05	F96T	1	1.63808e-05	S55V	1	1.63808e-05
A688R	2	3.27617e-05	E367I	1	1.63808e-05	G126E	1	1.63808e-05	S68del	2	3.27617e-05
A688Y	3	4.91425e-05	E367Y	1	1.63808e-05	G126L	2	3.27617e-05	S68G	1	1.63808e-05
A694N	1	1.63808e-05	E378M	1	1.63808e-05	G126stop	1	1.63808e-05	S68N	1	1.63808e-05
A694Q	1	1.63808e-05	E62I	1	1.63808e-05	G126T	1	1.63808e-05	S68stop	2	3.27617e-05
A694stop	7	0.000114666	E62T	7	0.000114666	G141A	2	3.27617e-05	S6D	1	1.63808e-05
A701F	1	1.63808e-05	F110A	2	3.27617e-05	G141E	6	9.8285e-05	S6I	2	3.27617e-05
A701M	1	1.63808e-05	F110C	1	1.63808e-05	G141K	1	1.63808e-05	T30E	3	4.91425e-05
A706F	3	4.91425e-05	F110D	1	1.63808e-05	G141N	2	3.27617e-05	T30Q	1	1.63808e-05
A706K	5	8.19041e-05	F110H	3	4.91425e-05	G147A	8	0.000131047	T9J	5	8.19041e-05
A706N	2	3.27617e-05	F110P	4	6.55233e-05	G147I	2	3.27617e-05	T9L	88	0.00144151
A706W	1	1.63808e-05	F110W	1	1.63808e-05	G153Q	1	1.63808e-05	T9M	18	0.000294855
A713R	2	3.27617e-05	F171G	1	1.63808e-05	G153T	3	4.91425e-05	T9N	1	1.63808e-05
A713W	3	4.91425e-05	F171H	2	3.27617e-05	G157F	12	0.00019657	T9stop	1	1.63808e-05
A766M	1	1.63808e-05	F171P	1	1.63808e-05	G182S	5	8.19041e-05	T9V	554	0.00907498
A766Y	2	3.27617e-05	F171stop	1	1.63808e-05	G182W	2	3.27617e-05	V14G	2	3.27617e-05
A771B	1	1.63808e-05	F17A	2	3.27617e-05	G189F	1	1.63808e-05	V14K	1	1.63808e-05
A771F	13	0.000212951	F17H	1	1.63808e-05	G189I	1	1.63808e-05	V14N	1	1.63808e-05
A771Q	1	1.63808e-05	F17P	2	3.27617e-05	G189K	1	1.63808e-05	V14P	1	1.63808e-05
A783W	1	1.63808e-05	F17Q	1	1.63808e-05	G189L	2	3.27617e-05	V17M	2	3.27617e-05
A829G	1	1.63808e-05	F17R	1	1.63808e-05	G189P	1	1.63808e-05	V24P	1	1.63808e-05
A831I	1	1.63808e-05	F17stop	2	3.27617e-05	G192E	2	3.27617e-05	V25K	2	3.27617e-05
A831R	1	1.63808e-05	F274A	1	1.63808e-05	G192L	1	1.63808e-05	V29stop	1	1.63808e-05
A831W	2	3.27617e-05	F274T	1	1.63808e-05	G202E	1	1.63808e-05	V47N	1	1.63808e-05
A831Y	1	1.63808e-05	F286N	1	1.63808e-05	G202H	1	1.63808e-05	V47Q	1	1.63808e-05
A845H	1	1.63808e-05	F286R	1	1.63808e-05	G202I	2	3.27617e-05	V47S	1	1.63808e-05
A845Q	3	4.91425e-05	F286Y	2	3.27617e-05	G202Y	1	1.63808e-05	V49K	1	1.63808e-05
A845Y	3	4.91425e-05	F307D	1	1.63808e-05	G25E	1	1.63808e-05	V49Y	1	1.63808e-05
A846Q	3	4.91425e-05	F307H	1	1.63808e-05	G25F	1	1.63808e-05	V52P	1	1.63808e-05
A846R	1	1.63808e-05	F307Q	1	1.63808e-05	G25I	2	3.27617e-05	V52R	2	3.27617e-05
A852D	1	1.63808e-05	F307stop	1	1.63808e-05	G25L	2	3.27617e-05	V52Y	1	1.63808e-05
A852F	1	1.63808e-05	F307T	1	1.63808e-05	G25M	3	4.91425e-05	V58C	1	1.63808e-05
A852K	7	0.000114666	F314M	2	3.27617e-05	G25Q	2	3.27617e-05	V58E	1	1.63808e-05
A852N	1	1.63808e-05	F314Q	1	1.63808e-05	G6E	2	3.27617e-05	V58K	1	1.63808e-05
A852R	1	1.63808e-05	F314R	2	3.27617e-05	G6L	2	3.27617e-05	V5Y	1	1.63808e-05
A871I	1	1.63808e-05	F315C	2	3.27617e-05	G78I	3	4.91425e-05	V62del	2	3.27617e-05
A876E	2	3.27617e-05	F315D	1	1.63808e-05	G78T	2	3.27617e-05	V62R	2	3.27617e-05
A876Y	1	1.63808e-05	F315N	1	1.63808e-05	G79H	4	6.55233e-05	V62S	2	3.27617e-05
A879R	3	4.91425e-05	F315Q	1	1.63808e-05	G79I	3	4.91425e-05	V70D	2	3.27617e-05
A879stop	1	1.63808e-05	F363D	1	1.63808e-05	G79Y	1	1.63808e-05	V70R	1	1.63808e-05
A890N	2	3.27617e-05	F363N	6	9.8285e-05	G89P	1	1.63808e-05	V70T	1	1.63808e-05
A890R	1	1.63808e-05	F403D	1	1.63808e-05	G89W	1	1.63808e-05	V75A	1	1.63808e-05
A890W	2	3.27617e-05	F403E	1	1.63808e-05	G89Y	2	3.27617e-05	Y2C	2	3.27617e-05
A899E	1	1.63808e-05	F403stop	1	1.63808e-05	H125C	2	3.27617e-05	Y2D	1	1.63808e-05
A899N	1	1.63808e-05	F53Q	2	3.27617e-05	H125E	2	3.27617e-05	Y2F	1	1.63808e-05
A899stop	1	1.63808e-05	F53T	1	1.63808e-05	H125I	2	3.27617e-05	Y42D	3	4.91425e-05
A903F	1	1.63808e-05	F53V	12	0.00019657	H148E	3	4.91425e-05	Y57N	6	9.8285e-05
A903I	3	4.91425e-05	F66E	1	1.63808e-05	H148K	1	1.63808e-05	Y57P	1	1.63808e-05
A903stop	2	3.27617e-05	F66G	3	4.91425e-05	H148stop	1	1.63808e-05	Y57V	1	1.63808e-05
A903Y	1	1.63808e-05	F66H	3	4.91425e-05	H154D	11	0.000180189	Y59N	1	1.63808e-05
A924I	1	1.63808e-05	F66M	25	0.000409521	H154F	1	1.63808e-05	Y59Q	1	1.63808e-05
A924K	1	1.63808e-05	F66N	5	8.19041e-05	H154P	7	0.000114666	Y59V	3	4.91425e-05
A942D	1	1.63808e-05	F66P	1	1.63808e-05	H155A	1	1.63808e-05
A956P	4	6.55233e-05	F66stop	16	0.000262093	H155E	1	1.63808e-05
A958C	2	3.27617e-05	G114D	1	1.63808e-05	H155F	1	1.63808e-05
A972F	1	1.63808e-05	G114N	10	0.000163808	H210M	3	4.91425e-05
A972N	2	3.27617e-05	G114W	1	1.63808e-05	H210Z	1	1.63808e-05
A972W	1	1.63808e-05	G116D	1	1.63808e-05	I118A	2	3.27617e-05
A989I	1	1.63808e-05	G116P	1	1.63808e-05	I118D	2	3.27617e-05
A989R	1	1.63808e-05	G116stop	3	4.91425e-05	I118E	2	3.27617e-05
A989Y	1	1.63808e-05	G120F	1	1.63808e-05	I118G	3	4.91425e-05
C1032A	1	1.63808e-05	G120N	3	4.91425e-05	I118K	2	3.27617e-05
C1032K	1	1.63808e-05	G120P	1	1.63808e-05	I118M	3	4.91425e-05
C1043I	1	1.63808e-05	G120Q	1	1.63808e-05	I128E	2	3.27617e-05
C1043N	1	1.63808e-05	G120stop	10	0.000163808	I128H	1	1.63808e-05
C1082R	4	6.55233e-05	G124E	4	6.55233e-05	I140C	1	1.63808e-05
C1082S	4	6.55233e-05	G124K	2	3.27617e-05	I140P	2	3.27617e-05
C1082Y	6	9.8285e-05	G124N	5	8.19041e-05	I140W	2	3.27617e-05
C1126Q	1	1.63808e-05	G124Q	1	1.63808e-05	I144M	4	6.55233e-05
C1126V	2	3.27617e-05	G124T	2	3.27617e-05	I144P	1	1.63808e-05
C1126W	1	1.63808e-05	G129N	1	1.63808e-05	I151N	3	4.91425e-05
C1235D	1	1.63808e-05	G129R	37	0.000606091	I151P	3	4.91425e-05
C1235N	1	1.63808e-05	G137K	1	1.63808e-05	I151Q	1	1.63808e-05
C1235V	2	3.27617e-05	G137N	2	3.27617e-05	I151S	3	4.91425e-05
C1236P	2	3.27617e-05	G164I	1	1.63808e-05	I161P	1	1.63808e-05
C1240K	2	3.27617e-05	G170T	1	1.63808e-05	I161Y	2	3.27617e-05
C1240N	1	1.63808e-05	G170Y	1	1.63808e-05	I168A	5	8.19041e-05
C1240T	1	1.63808e-05	G178E	1	1.63808e-05	I168D	1	1.63808e-05
C1241N	1	1.63808e-05	G179E	1	1.63808e-05	I168Q	1	1.63808e-05
C1241T	2	3.27617e-05	G179F	3	4.91425e-05	I168T	4	6.55233e-05
C1243A	1	1.63808e-05	G179L	4	6.55233e-05	I201P	2	3.27617e-05
C1243E	1	1.63808e-05	G18H	2	3.27617e-05	I201R	1	1.63808e-05
C1243M	1	1.63808e-05	G18L	1	1.63808e-05	I217J	1	1.63808e-05
C1243P	1	1.63808e-05	G18P	1	1.63808e-05	I24A	1	1.63808e-05
C1247E	1	1.63808e-05	G18Y	2	3.27617e-05	I24P	1	1.63808e-05
C1247H	1	1.63808e-05	G19P	2	3.27617e-05	I24Y	7	0.000114666
C1247stop	1	1.63808e-05	G19Y	2	3.27617e-05	I32A	5	8.19041e-05
C1250I	1	1.63808e-05	G204F	1	1.63808e-05	I32C	5	8.19041e-05
C1253E	1	1.63808e-05	G204T	2	3.27617e-05	I32D	3	4.91425e-05
C1254H	2	3.27617e-05	G236T	1	1.63808e-05	I32E	2	3.27617e-05
C1254T	1	1.63808e-05	G236W	1	1.63808e-05	I32H	2	3.27617e-05
C131E	3	4.91425e-05	G238I	1	1.63808e-05	I32M	4	6.55233e-05
C131M	5	8.19041e-05	G238Y	1	1.63808e-05	I32P	9	0.000147427
C131Q	8	0.000131047	G243L	1	1.63808e-05	I32Q	1	1.63808e-05
C136A	2	3.27617e-05	G25E	1	1.63808e-05	I32R	1	1.63808e-05
C136E	1	1.63808e-05	G25I	1	1.63808e-05	I32Y	11	0.000180189
C136T	4	6.55233e-05	G25K	1	1.63808e-05	I48C	1	1.63808e-05
C15D	1	1.63808e-05	G25L	2	3.27617e-05	I48P	2	3.27617e-05
C15H	2	3.27617e-05	G25Y	2	3.27617e-05	I49K	4	6.55233e-05
C15I	1	1.63808e-05	G278A	1	1.63808e-05	I49W	2	3.27617e-05
C15L	3	4.91425e-05	G278E	1	1.63808e-05	I49Y	2	3.27617e-05
C15N	1	1.63808e-05	G278T	4	6.55233e-05	I52G	1	1.63808e-05
C15Q	1	1.63808e-05	G284I	1	1.63808e-05	I52R	1	1.63808e-05
C15stop	3	4.91425e-05	G284M	1	1.63808e-05	I52stop	1	1.63808e-05
C166E	4	6.55233e-05	G295K	1	1.63808e-05	I73D	2	3.27617e-05
C166M	4	6.55233e-05	G295M	1	1.63808e-05	I73G	1	1.63808e-05
C166P	2	3.27617e-05	G30C	1	1.63808e-05	I73N	5	8.19041e-05
C166stop	35	0.000573329	G30I	1	1.63808e-05	I73Q	4	6.55233e-05
C166V	16	0.000262093	G30L	13	0.000212951	I73stop	2	3.27617e-05
C291E	1	1.63808e-05	G30M	1	1.63808e-05	I76G	2	3.27617e-05
C291G	11	0.000180189	G316K	1	1.63808e-05	I76R	2	3.27617e-05
C291I	2	3.27617e-05	G321K	1	1.63808e-05	I80G	1	1.63808e-05
C291Q	4	6.55233e-05	G321L	1	1.63808e-05	I80N	4	6.55233e-05
C301H	3	4.91425e-05	G321P	1	1.63808e-05	I80W	2	3.27617e-05
C301K	2	3.27617e-05	G321T	1	1.63808e-05	I82G	2	3.27617e-05
C301M	1	1.63808e-05	G321Y	1	1.63808e-05	I82Q	4	6.55233e-05
C301stop	27	0.000442282	G328F	1	1.63808e-05	I8A	1	1.63808e-05
C336I	1	1.63808e-05	G328K	1	1.63808e-05	I8G	2	3.27617e-05
C336K	11	0.000180189	G328M	1	1.63808e-05	I97C	1	1.63808e-05
C336M	2	3.27617e-05	G328Q	1	1.63808e-05	I97P	1	1.63808e-05
C336N	2	3.27617e-05	G335H	1	1.63808e-05	I97R	1	1.63808e-05
C336P	2	3.27617e-05	G34I	98	0.00160532	I97W	2	3.27617e-05
C336Y	11	0.000180189	G34L	3	4.91425e-05	ins100VLVYFLQSINFV	1	1.63808e-05
C361H	1	1.63808e-05	G34M	1	1.63808e-05	ins102SHGR	1	1.63808e-05
C361K	6	9.8285e-05	G34Q	16	0.000262093	ins103K	1	1.63808e-05
C361M	1	1.63808e-05	G34S	6	9.8285e-05	ins104AL	1	1.63808e-05
C361Q	1	1.63808e-05	G34stop	1	1.63808e-05	ins104XXXXXXXXX	1	1.63808e-05
C361Y	7	0.000114666	G44F	16	0.000262093	ins108F	1	1.63808e-05
C379H	1	1.63808e-05	G44I	1	1.63808e-05	ins108MWSLAQVVXXXXXXXXXXXXXXXXXVSNTIMstopRKSPAVRPRRRREIQCISRVDEFVFSRS	1	1.63808e-05
C379N	1	1.63808e-05	G44K	3	4.91425e-05	ins108RRPQGLPXXXX	1	1.63808e-05
C379Q	2	3.27617e-05	G44Q	2	3.27617e-05	ins108Y	1	1.63808e-05
C391G	5	8.19041e-05	G44stop	2	3.27617e-05	ins109E	1	1.63808e-05
C391N	1	1.63808e-05	G44T	3	4.91425e-05	ins109G	3	4.91425e-05
C391P	4	6.55233e-05	G44Y	2	3.27617e-05	ins10A	1	1.63808e-05
C391T	4	6.55233e-05	G5D	4	6.55233e-05	ins10AMA	3	4.91425e-05
C391V	2	3.27617e-05	G5del	1	1.63808e-05	ins110GLVTRSMW	4	6.55233e-05
C391Y	5	8.19041e-05	G5K	23	0.000376759	ins110GLVTRSMWGLVTR	1	1.63808e-05
C432E	1	1.63808e-05	G5M	1	1.63808e-05	ins111LAQVVGICTTRSMWS	1	1.63808e-05
C432F	6	9.8285e-05	G5P	2	3.27617e-05	ins111stop	1	1.63808e-05
C432H	1	1.63808e-05	G60E	1	1.63808e-05	ins112HS	1	1.63808e-05
C432K	1	1.63808e-05	G60H	2	3.27617e-05	ins112IR	1	1.63808e-05
C432S	3	4.91425e-05	G60K	1	1.63808e-05	ins112XXXXXXXXXXXXXRTRSMWSF	1	1.63808e-05
C480D	1	1.63808e-05	G60M	1	1.63808e-05	ins113PETNILLNXXXXRTRSMWSFN	1	1.63808e-05
C480F	4	6.55233e-05	G60P	1	1.63808e-05	ins113PETNXXXXXXXXRTRSMWSFN	1	1.63808e-05
C480M	2	3.27617e-05	G60stop	1	1.63808e-05	ins113PXXXXXXXXXXXRTRSMWSFN	1	1.63808e-05
C480stop	5	8.19041e-05	G60W	5	8.19041e-05	ins113XXXXXXXXXXXHCTRSMWSFN	1	1.63808e-05
C480W	2	3.27617e-05	G69C	1	1.63808e-05	ins113XXXXXXXXXXXXRTRSMWSFN	2	3.27617e-05
C488A	2	3.27617e-05	G69H	31	0.000507806	ins114ETNILLNXXXHCTRSMWSFNP	1	1.63808e-05
C488H	3	4.91425e-05	G69K	20	0.000327617	ins114ETNILXXXXXHCTRSMWSFNP	1	1.63808e-05
C488K	1	1.63808e-05	G69M	12	0.00019657	ins115QTT	1	1.63808e-05
C488M	2	3.27617e-05	G69N	12	0.00019657	ins115TNILLNVPLHARSMWSFNPE	1	1.63808e-05
C488N	6	9.8285e-05	G69Y	1	1.63808e-05	ins116IVYFLQSI	1	1.63808e-05
C488P	1	1.63808e-05	G71E	3	4.91425e-05	ins116NILLNVPLHRTRSMWSFNPET	2	3.27617e-05
C525E	1	1.63808e-05	G71I	17	0.000278474	ins117GTLLSSMSQFRSR	1	1.63808e-05
C525I	3	4.91425e-05	G71Q	18	0.000294855	ins118stop	1	1.63808e-05
C525K	1	1.63808e-05	G71stop	8	0.000131047	ins121SGLNSCRPHK	1	1.63808e-05
C525N	2	3.27617e-05	G71W	2	3.27617e-05	ins124HK	1	1.63808e-05
C525P	1	1.63808e-05	G71Y	7	0.000114666	ins124W	1	1.63808e-05
C525Y	7	0.000114666	G85K	3	4.91425e-05	ins125P	1	1.63808e-05
C538A	1	1.63808e-05	G85L	2	3.27617e-05	ins125PSTHPP	1	1.63808e-05
C538G	1	1.63808e-05	G85P	5	8.19041e-05	ins125SM	1	1.63808e-05
C538K	1	1.63808e-05	G85stop	1	1.63808e-05	ins127C	1	1.63808e-05
C538stop	2	3.27617e-05	G85T	3	4.91425e-05	ins128HQT	1	1.63808e-05
C538V	1	1.63808e-05	G96H	1	1.63808e-05	ins128P	6	9.8285e-05
C590P	1	1.63808e-05	G96L	2	3.27617e-05	ins128PVSYTHLRAHETLR	1	1.63808e-05
C590stop	1	1.63808e-05	G96W	10	0.000163808	ins128stopPDRFstopK	1	1.63808e-05
C617H	2	3.27617e-05	G97A	3	4.91425e-05	ins129NS	4	6.55233e-05
C617N	2	3.27617e-05	G97H	1	1.63808e-05	ins12XXX	1	1.63808e-05
C649H	1	1.63808e-05	G97P	1	1.63808e-05	ins130AS	2	3.27617e-05
C649P	1	1.63808e-05	G97R	10	0.000163808	ins130DRFstopKstopTRNRSC	1	1.63808e-05
C662A	1	1.63808e-05	G97stop	1	1.63808e-05	ins131FstopKstopTRNRSCD	1	1.63808e-05
C662G	2	3.27617e-05	G99H	1	1.63808e-05	ins131IV	14	0.000229332
C662M	2	3.27617e-05	G99K	2	3.27617e-05	ins132stopSELstopSFVDIFV	2	3.27617e-05
C662stop	1	1.63808e-05	G99N	2	3.27617e-05	ins132W	2	3.27617e-05
C671H	2	3.27617e-05	G99P	1	1.63808e-05	ins135FstopPDRFstopVNSstop	1	1.63808e-05
C671L	5	8.19041e-05	G99T	2	3.27617e-05	ins136RSF	2	3.27617e-05
C671M	1	1.63808e-05	G99W	4	6.55233e-05	ins136V	1	1.63808e-05
C738E	1	1.63808e-05	H145F	1	1.63808e-05	ins137Pstop	1	1.63808e-05
C738G	3	4.91425e-05	H145K	1	1.63808e-05	ins138S	1	1.63808e-05
C738N	1	1.63808e-05	H300M	1	1.63808e-05	ins142FDXXX	1	1.63808e-05
C738stop	4	6.55233e-05	H356P	1	1.63808e-05	ins142VIXXXXXXXXXXXXXXXXXXXXXXXXXXXXXXXXX	1	1.63808e-05
C743Q	2	3.27617e-05	H59D	1	1.63808e-05	ins143CF	2	3.27617e-05
C743R	7	0.000114666	H59I	2	3.27617e-05	ins143GTNL	1	1.63808e-05
C749D	1	1.63808e-05	H59stop	4	6.55233e-05	ins143VC	1	1.63808e-05
C749G	1	1.63808e-05	H59V	1	1.63808e-05	ins144KCLPXX	1	1.63808e-05
C749H	1	1.63808e-05	I130A	2	3.27617e-05	ins145LYSFVSEEI	1	1.63808e-05
C749P	2	3.27617e-05	I130C	3	4.91425e-05	ins146PYMDLSSTICLC	1	1.63808e-05
C749stop	2	3.27617e-05	I130J	1	1.63808e-05	ins146QLQQSXXXX	1	1.63808e-05
C760N	1	1.63808e-05	I130P	2	3.27617e-05	ins147NQ	1	1.63808e-05
C840E	1	1.63808e-05	I131F	1	1.63808e-05	ins148Q	1	1.63808e-05
C840I	1	1.63808e-05	I131N	1	1.63808e-05	ins148SCDPSWT	4	6.55233e-05
C851D	1	1.63808e-05	I131S	2	3.27617e-05	ins149A	1	1.63808e-05
C851G	2	3.27617e-05	I146J	1	1.63808e-05	ins149CDPSWTS	1	1.63808e-05
C851N	1	1.63808e-05	I157stop	1	1.63808e-05	ins152XX	1	1.63808e-05
C851Q	2	3.27617e-05	I15A	3	4.91425e-05	ins153LP	1	1.63808e-05
C851T	4	6.55233e-05	I15C	1	1.63808e-05	ins153LPYGA	10	0.000163808
D1041Q	1	1.63808e-05	I15G	1	1.63808e-05	ins153LPYGANK	6	9.8285e-05
D1041V	5	8.19041e-05	I15H	7	0.000114666	ins154CWT	1	1.63808e-05
D1118C	1	1.63808e-05	I15J	1	1.63808e-05	ins154IstopTLstop	1	1.63808e-05
D1118P	1	1.63808e-05	I15Q	2	3.27617e-05	ins155MNATKCAF	1	1.63808e-05
D111F	6	9.8285e-05	I292F	1	1.63808e-05	ins155QS	1	1.63808e-05
D111W	4	6.55233e-05	I304C	3	4.91425e-05	ins155SLSF	1	1.63808e-05
D1127F	1	1.63808e-05	I304G	1	1.63808e-05	ins156GR	1	1.63808e-05
D1127K	1	1.63808e-05	I320A	2	3.27617e-05	ins156NCGLN	1	1.63808e-05
D1127S	1	1.63808e-05	I320G	1	1.63808e-05	ins156XXXXX	1	1.63808e-05
D1146C	2	3.27617e-05	I320Y	1	1.63808e-05	ins157ANKXXXX	4	6.55233e-05
D1146I	2	3.27617e-05	I337P	1	1.63808e-05	ins157AXXXX	6	9.8285e-05
D1153W	2	3.27617e-05	I337Q	1	1.63808e-05	ins158LSIS	1	1.63808e-05
D1163I	2	3.27617e-05	I337R	1	1.63808e-05	ins159AEstopILVTTstop	1	1.63808e-05
D1168F	4	6.55233e-05	I351P	1	1.63808e-05	ins159YIVYSCA	1	1.63808e-05
D1168I	1	1.63808e-05	I357D	3	4.91425e-05	ins160PSWTSSYCWTPSRTLstop	1	1.63808e-05
D1168stop	2	3.27617e-05	I357J	1	1.63808e-05	ins160SSSCC	1	1.63808e-05
D1184C	2	3.27617e-05	I357K	1	1.63808e-05	ins160WT	1	1.63808e-05
D1184F	3	4.91425e-05	I357N	6	9.8285e-05	ins161YND	1	1.63808e-05
D1184L	1	1.63808e-05	I74C	6	9.8285e-05	ins163CW	1	1.63808e-05
D1184W	1	1.63808e-05	I74E	19	0.000311236	ins163LMLLQRIMVILL	1	1.63808e-05
D1199I	1	1.63808e-05	I74H	5	8.19041e-05	ins163LSIV	3	4.91425e-05
D1257A	1	1.63808e-05	I74K	17	0.000278474	ins163P	1	1.63808e-05
D1257L	1	1.63808e-05	I74P	10	0.000163808	ins164EHCK	1	1.63808e-05
D1259B	1	1.63808e-05	I74R	27	0.000442282	ins164LILstopSG	1	1.63808e-05
D1260I	1	1.63808e-05	I74W	1	1.63808e-05	ins165A	1	1.63808e-05
D1260K	1	1.63808e-05	I84G	3	4.91425e-05	ins165AstopK	1	1.63808e-05
D1260Q	1	1.63808e-05	I84J	1	1.63808e-05	ins165ICL	2	3.27617e-05
D138M	1	1.63808e-05	I84K	4	6.55233e-05	ins165M	1	1.63808e-05
D178M	1	1.63808e-05	I84R	1	1.63808e-05	ins165MVQF	1	1.63808e-05
D178Q	1	1.63808e-05	I84stop	3	4.91425e-05	ins165T	1	1.63808e-05
D178stop	3	4.91425e-05	I84W	1	1.63808e-05	ins166FMLstopSTSCRVstop	1	1.63808e-05
D178W	2	3.27617e-05	I94C	3	4.91425e-05	ins166GLYLPRstop	1	1.63808e-05
D198Q	2	3.27617e-05	I94K	1	1.63808e-05	ins167XF	1	1.63808e-05
D198T	3	4.91425e-05	I94P	2	3.27617e-05	ins168IGYK	1	1.63808e-05
D215P	26	0.000425902	ins100IS	1	1.63808e-05	ins168IIstopIVGSMC	1	1.63808e-05
D215W	1	1.63808e-05	ins100SYQTNSWWstopRstop	1	1.63808e-05	ins168LLH	1	1.63808e-05
D228F	15	0.000245712	ins100WWstopRstop	1	1.63808e-05	ins168NFR	1	1.63808e-05
D228K	3	4.91425e-05	ins101stopstopRstopN	1	1.63808e-05	ins168RDPQ	1	1.63808e-05
D228Q	1	1.63808e-05	ins101VTstop	1	1.63808e-05	ins168TDAVRDPQ	1	1.63808e-05
D228W	2	3.27617e-05	ins102I	2	3.27617e-05	ins169NQLLLLECLXXXX	1	1.63808e-05
D253F	3	4.91425e-05	ins102ISVQD	1	1.63808e-05	ins16DXX	3	4.91425e-05
D253I	15	0.000245712	ins102R	1	1.63808e-05	ins16PstopR	20	0.000327617
D253M	1	1.63808e-05	ins102stop	1	1.63808e-05	ins170ATRG	1	1.63808e-05
D253R	5	8.19041e-05	ins102VTVKstop	1	1.63808e-05	ins170G	1	1.63808e-05
D253S	11	0.000180189	ins103VF	1	1.63808e-05	ins170SIFMLstopS	1	1.63808e-05
D287F	2	3.27617e-05	ins104KstopRS	1	1.63808e-05	ins170stopDA	5	8.19041e-05
D287T	3	4.91425e-05	ins105F	1	1.63808e-05	ins171DLF	1	1.63808e-05
D290B	1	1.63808e-05	ins105Q	1	1.63808e-05	ins171LVXXXXXX	1	1.63808e-05
D290M	11	0.000180189	ins106RWYFYYLGXXXXXXXXXXXXXXXXXXXXXXXXXXXXXXXXXKDLSP	1	1.63808e-05	ins171Ystop	1	1.63808e-05
D290Q	3	4.91425e-05	ins107D	1	1.63808e-05	ins172C	3	4.91425e-05
D290W	1	1.63808e-05	ins109G	1	1.63808e-05	ins172TS	2	3.27617e-05
D294F	11	0.000180189	ins109stop	1	1.63808e-05	ins173IYQTXXX	1	1.63808e-05
D294I	3	4.91425e-05	ins110PKS	1	1.63808e-05	ins173stopRNHVL	1	1.63808e-05
D294Q	4	6.55233e-05	ins110S	1	1.63808e-05	ins174XX	1	1.63808e-05
D364C	2	3.27617e-05	ins110TTstop	1	1.63808e-05	ins175SRDI	1	1.63808e-05
D364P	1	1.63808e-05	ins112Y	5	8.19041e-05	ins175XXXXXX	1	1.63808e-05
D364Q	2	3.27617e-05	ins113PR	1	1.63808e-05	ins176LI	2	3.27617e-05
D364R	2	3.27617e-05	ins115TstopEL	1	1.63808e-05	ins176LK	1	1.63808e-05
D364T	1	1.63808e-05	ins115WXXXXXXXXXXXXXXXXXXX	1	1.63808e-05	ins176stopFFCLELstopFstop	1	1.63808e-05
D364V	4	6.55233e-05	ins116K	1	1.63808e-05	ins176stopHQGP	2	3.27617e-05
D389F	6	9.8285e-05	ins116stopEL	1	1.63808e-05	ins176stopHQGPAstopRNHCCYITN	1	1.63808e-05
D389K	1	1.63808e-05	ins116stopKLTSFMV	2	3.27617e-05	ins176stopHXXX	1	1.63808e-05
D389M	1	1.63808e-05	ins116stopNW	1	1.63808e-05	ins177KKSL	1	1.63808e-05
D398A	3	4.91425e-05	ins116XXGLE	1	1.63808e-05	ins177SC	1	1.63808e-05
D398S	15	0.000245712	ins117PLSLNMARKTL	1	1.63808e-05	ins177stop	1	1.63808e-05
D398W	2	3.27617e-05	ins118DST	2	3.27617e-05	ins177stopCFSLLLA	1	1.63808e-05
D40C	1	1.63808e-05	ins118E	1	1.63808e-05	ins177stopKP	1	1.63808e-05
D40F	3	4.91425e-05	ins118K	1	1.63808e-05	ins178CCFSERF	1	1.63808e-05
D420F	1	1.63808e-05	ins118W	2	3.27617e-05	ins178ERFL	1	1.63808e-05
D420K	2	3.27617e-05	ins119WT	1	1.63808e-05	ins178L	1	1.63808e-05
D427C	5	8.19041e-05	ins11C	3	4.91425e-05	ins178LLNF	1	1.63808e-05
D427F	1	1.63808e-05	ins11CT	1	1.63808e-05	ins178TN	1	1.63808e-05
D427Q	5	8.19041e-05	ins11ETSVVTYCTSKAIL	1	1.63808e-05	ins179GPAstop	1	1.63808e-05
D427stop	1	1.63808e-05	ins120AQKLD	2	3.27617e-05	ins179LYLYALV	1	1.63808e-05
D427T	1	1.63808e-05	ins120ISTTstopNRARSstop	1	1.63808e-05	ins179TXXXXXX	1	1.63808e-05
D428C	1	1.63808e-05	ins120K	1	1.63808e-05	ins17GM	2	3.27617e-05
D428K	1	1.63808e-05	ins120Sstop	1	1.63808e-05	ins17RM	1	1.63808e-05
D428N	4	6.55233e-05	ins121LWCstopRAA	1	1.63808e-05	ins181FLITN	1	1.63808e-05
D428T	1	1.63808e-05	ins122F	1	1.63808e-05	ins181XXXX	1	1.63808e-05
D442K	1	1.63808e-05	ins122L	2	3.27617e-05	ins183FVstopR	1	1.63808e-05
D442M	1	1.63808e-05	ins122QDF	1	1.63808e-05	ins184F	1	1.63808e-05
D442P	3	4.91425e-05	ins122RN	2	3.27617e-05	ins184XXXXXXXX	1	1.63808e-05
D442R	1	1.63808e-05	ins122S	2	3.27617e-05	ins185Vstop	1	1.63808e-05
D467F	1	1.63808e-05	ins122T	1	1.63808e-05	ins186SPXXX	1	1.63808e-05
D467P	1	1.63808e-05	ins123ARKT	1	1.63808e-05	ins186stopLRFCDT	1	1.63808e-05
D467R	6	9.8285e-05	ins123C	1	1.63808e-05	ins189VLTES	1	1.63808e-05
D467T	8	0.000131047	ins123CstopQRRHHM	1	1.63808e-05	ins18GTITVEELKKLLE	1	1.63808e-05
D467V	10	0.000163808	ins123H	1	1.63808e-05	ins18HTITVEELKKLLE	1	1.63808e-05
D53I	5	8.19041e-05	ins123P	1	1.63808e-05	ins191GFAAYXXXXXXXXXXXXXXXXXXXXXXXXXXXXXXXXX	1	1.63808e-05
D53M	2	3.27617e-05	ins123RCstopQRRHHM	1	1.63808e-05	ins192FETKCTLKS	1	1.63808e-05
D53stop	4	6.55233e-05	ins123stop	1	1.63808e-05	ins192V	1	1.63808e-05
D568C	1	1.63808e-05	ins123TSstop	1	1.63808e-05	ins192VE	1	1.63808e-05
D568P	1	1.63808e-05	ins124A	1	1.63808e-05	ins193R	1	1.63808e-05
D571B	1	1.63808e-05	ins124C	1	1.63808e-05	ins193RFSVY	1	1.63808e-05
D571I	1	1.63808e-05	ins124W	1	1.63808e-05	ins193STGVNL	1	1.63808e-05
D571Q	1	1.63808e-05	ins125A	1	1.63808e-05	ins194DstopE	3	4.91425e-05
D574T	1	1.63808e-05	ins125Cstop	1	1.63808e-05	ins194V	1	1.63808e-05
D578B	1	1.63808e-05	ins125G	1	1.63808e-05	ins194WPLLF	1	1.63808e-05
D578E	1	1.63808e-05	ins125stop	2	3.27617e-05	ins195R	1	1.63808e-05
D578H	2	3.27617e-05	ins125stopL	1	1.63808e-05	ins196stopPDRFstopN	2	3.27617e-05
D578N	3	4.91425e-05	ins126LDFPSRYstopT	1	1.63808e-05	ins198stop	1	1.63808e-05
D578P	1	1.63808e-05	ins126LREPstopIHQKITL	1	1.63808e-05	ins199CT	1	1.63808e-05
D586I	1	1.63808e-05	ins127AT	1	1.63808e-05	ins199GT	1	1.63808e-05
D614E	1	1.63808e-05	ins127IG	1	1.63808e-05	ins19GTstopstop	1	1.63808e-05
D614L	1	1.63808e-05	ins127KT	1	1.63808e-05	ins19TL	1	1.63808e-05
D614Y	2	3.27617e-05	ins128RHPY	1	1.63808e-05	ins203stopHSSQRATPWHY	1	1.63808e-05
D627C	1	1.63808e-05	ins129R	1	1.63808e-05	ins206stop	2	3.27617e-05
D627K	1	1.63808e-05	ins12H	1	1.63808e-05	ins207stop	1	1.63808e-05
D663I	2	3.27617e-05	ins12HPAL	1	1.63808e-05	ins209RMT	1	1.63808e-05
D737F	3	4.91425e-05	ins12L	1	1.63808e-05	ins20TstopstopstopV	2	3.27617e-05
D737stop	2	3.27617e-05	ins12LLHYVWWT	1	1.63808e-05	ins210C	1	1.63808e-05
D745C	2	3.27617e-05	ins12LRTLRLVD	1	1.63808e-05	ins213RFGstopFLQTIATI	1	1.63808e-05
D745K	1	1.63808e-05	ins12N	1	1.63808e-05	ins21PSNR	1	1.63808e-05
D745P	1	1.63808e-05	ins12P	2	3.27617e-05	ins21PSNXFPI	1	1.63808e-05
D775V	1	1.63808e-05	ins130A	1	1.63808e-05	ins21XXXXXXXX	1	1.63808e-05
D796C	23	0.000376759	ins130TMG	1	1.63808e-05	ins22FSYS	1	1.63808e-05
D796P	1	1.63808e-05	ins130Y	1	1.63808e-05	ins22XXXXXXXX	1	1.63808e-05
D796S	2	3.27617e-05	ins131CCN	1	1.63808e-05	ins23MFP	2	3.27617e-05
D808F	10	0.000163808	ins131stop	1	1.63808e-05	ins23R	1	1.63808e-05
D808T	6	9.8285e-05	ins132CstopQRHPCR	1	1.63808e-05	ins23stop	1	1.63808e-05
D820F	1	1.63808e-05	ins132CstopQRRHHMG	2	3.27617e-05	ins24A	1	1.63808e-05
D830K	2	3.27617e-05	ins132CstopQRRHHMR	1	1.63808e-05	ins24FSYSLH	1	1.63808e-05
D830P	2	3.27617e-05	ins132E	1	1.63808e-05	ins24R	1	1.63808e-05
D839W	1	1.63808e-05	ins132VATEGALNTPKDHIGTRNPANKDGIIW	4	6.55233e-05	ins24Y	1	1.63808e-05
D843F	1	1.63808e-05	ins133ATEGALNTPKDHIANKDGIIWV	1	1.63808e-05	ins25TT	1	1.63808e-05
D843R	1	1.63808e-05	ins133stopQRQHHMG	1	1.63808e-05	ins25XXXXX	1	1.63808e-05
D848B	2	3.27617e-05	ins133stopQRQHHMGFS	1	1.63808e-05	ins26PIXXX	1	1.63808e-05
D848K	1	1.63808e-05	ins133Y	1	1.63808e-05	ins26PXXXX	2	3.27617e-05
D867I	2	3.27617e-05	ins135L	1	1.63808e-05	ins27A	1	1.63808e-05
D867P	1	1.63808e-05	ins135stop	2	3.27617e-05	ins27SYMD	1	1.63808e-05
D867stop	1	1.63808e-05	ins136ASYGCNstop	1	1.63808e-05	ins28PYMD	1	1.63808e-05
D936I	3	4.91425e-05	ins136RHHMGCNstopG	1	1.63808e-05	ins28S	1	1.63808e-05
D950C	1	1.63808e-05	ins137G	1	1.63808e-05	ins28XN	1	1.63808e-05
D950F	3	4.91425e-05	ins139P	1	1.63808e-05	ins28YN	2	3.27617e-05
D950L	1	1.63808e-05	ins13ALRLVDL	1	1.63808e-05	ins29K	1	1.63808e-05
D950W	1	1.63808e-05	ins13ALRLVTL	1	1.63808e-05	ins29MDLS	1	1.63808e-05
D979F	1	1.63808e-05	ins13F	1	1.63808e-05	ins31ISST	1	1.63808e-05
D979L	1	1.63808e-05	ins13HYVWRTL	1	1.63808e-05	ins31LSST	1	1.63808e-05
D985F	2	3.27617e-05	ins13I	1	1.63808e-05	ins31PMPTGIG	1	1.63808e-05
D985M	1	1.63808e-05	ins13L	1	1.63808e-05	ins31XLSST	1	1.63808e-05
D994P	2	3.27617e-05	ins13PQYVWRTL	1	1.63808e-05	ins32LAMADSNI	1	1.63808e-05
D994T	2	3.27617e-05	ins13XX	1	1.63808e-05	ins32S	11	0.000180189
E1017C	1	1.63808e-05	ins144HIGTRNPANNAAIVLQLPQGTTLPKGFYAEALNTPKD	2	3.27617e-05	ins33stopLHstop	10	0.000163808
E1017F	1	1.63808e-05	ins144PNFKDQVILLNKHIDA	1	1.63808e-05	ins33XXXXXXXXXXXXXXXXXXXXXXXXXX	1	1.63808e-05
E1017P	3	4.91425e-05	ins144Q	2	3.27617e-05	ins34CHGMV	1	1.63808e-05
E1017T	1	1.63808e-05	ins144QN	3	4.91425e-05	ins34S	1	1.63808e-05
E1017Y	1	1.63808e-05	ins145NNVGP	2	3.27617e-05	ins34stopLSstopFP	1	1.63808e-05
E1031I	1	1.63808e-05	ins147HIG	1	1.63808e-05	ins35stop	2	3.27617e-05
E1072stop	3	4.91425e-05	ins147PXX	3	4.91425e-05	ins36EstopV	3	4.91425e-05
E1092P	1	1.63808e-05	ins149NPANTPKDHIGTR	1	1.63808e-05	ins36QEstopVFVIstopLSstop	1	1.63808e-05
E1092S	2	3.27617e-05	ins149RSYQTNSWWstopRstop	1	1.63808e-05	ins36stopPSLLRFD	1	1.63808e-05
E1144M	2	3.27617e-05	ins14NDVWWTHQIQ	1	1.63808e-05	ins36XXXXXXXX	1	1.63808e-05
E1144T	2	3.27617e-05	ins150PANNAAIVLQLPQGTTLPKGFYAEGSRGGSQASSRSSSRSRNSSRGTRN	1	1.63808e-05	ins37QTVC	1	1.63808e-05
E1151H	2	3.27617e-05	ins154HYVYIGDP	1	1.63808e-05	ins38NGT	1	1.63808e-05
E1151I	1	1.63808e-05	ins155T	1	1.63808e-05	ins38PSASAFFGM	1	1.63808e-05
E1182F	1	1.63808e-05	ins156ESCLYGRX	1	1.63808e-05	ins39G	4	6.55233e-05
E1182W	3	4.91425e-05	ins159HstopLstopE	1	1.63808e-05	ins39GT	3	4.91425e-05
E1182Y	1	1.63808e-05	ins15L	1	1.63808e-05	ins39NXXXXXXXXXXXXXXXXXXXCLXXXXXXXXXXXX	1	1.63808e-05
E1188C	1	1.63808e-05	ins161PQGTDYKHWPQIAQF	1	1.63808e-05	ins40TT	1	1.63808e-05
E1188F	1	1.63808e-05	ins164CYNFLKE	1	1.63808e-05	ins41LPMPT	1	1.63808e-05
E1188M	1	1.63808e-05	ins164WARSW	1	1.63808e-05	ins42VDLGD	1	1.63808e-05
E1195F	1	1.63808e-05	ins165LstopW	1	1.63808e-05	ins43G	20	0.000327617
E1195N	3	4.91425e-05	ins165SISCRSVLstop	1	1.63808e-05	ins43XX	1	1.63808e-05
E1195P	1	1.63808e-05	ins166CL	1	1.63808e-05	ins44EAMKstopLS	2	3.27617e-05
E1195T	1	1.63808e-05	ins166NFLKEQH	1	1.63808e-05	ins44PTGIG	1	1.63808e-05
E1202L	1	1.63808e-05	ins166T	7	0.000114666	ins45PTGIG	2	3.27617e-05
E1207I	1	1.63808e-05	ins166XXT	1	1.63808e-05	ins46stop	1	1.63808e-05
E1207P	3	4.91425e-05	ins167WCstop	1	1.63808e-05	ins48stop	1	1.63808e-05
E1207R	3	4.91425e-05	ins168LI	2	3.27617e-05	ins50D	1	1.63808e-05
E1207T	1	1.63808e-05	ins169HD	2	3.27617e-05	ins50stopFSSGCYGQstopLstop	2	3.27617e-05
E1258N	1	1.63808e-05	ins16V	1	1.63808e-05	ins57XLXXXXXXXXXXXXXXXXXXXXXXXXXXXXXXXXXXXXXXXXXXXXXXXXXXXXXXXXXXXXXXXXXXXXX	1	1.63808e-05
E1258R	1	1.63808e-05	ins174QHCQKX	1	1.63808e-05	ins58TEstopIGS	2	3.27617e-05
E1262F	2	3.27617e-05	ins178stopWstopDTC	1	1.63808e-05	ins59NFN	1	1.63808e-05
E1262H	1	1.63808e-05	ins179VKPLLVP	1	1.63808e-05	ins5L	1	1.63808e-05
E132C	5	8.19041e-05	ins17L	1	1.63808e-05	ins60AESR	1	1.63808e-05
E132I	5	8.19041e-05	ins180QASSRSFYAEGSRGGS	1	1.63808e-05	ins61XXXX	1	1.63808e-05
E154C	1	1.63808e-05	ins181E	1	1.63808e-05	ins62LFC	1	1.63808e-05
E154Y	4	6.55233e-05	ins181RGE	1	1.63808e-05	ins62TF	1	1.63808e-05
E156I	5	8.19041e-05	ins181VSL	3	4.91425e-05	ins62TFC	6	9.8285e-05
E156P	3	4.91425e-05	ins184S	1	1.63808e-05	ins64H	1	1.63808e-05
E156W	2	3.27617e-05	ins186stopVY	1	1.63808e-05	ins65C	1	1.63808e-05
E169C	8	0.000131047	ins187P	1	1.63808e-05	ins66C	1	1.63808e-05
E169F	1	1.63808e-05	ins187WHPQSCstopQLQSCYNF	1	1.63808e-05	ins69A	1	1.63808e-05
E169M	8	0.000131047	ins18LV	1	1.63808e-05	ins69CXQNXX	1	1.63808e-05
E169T	7	0.000114666	ins18TLRFQL	1	1.63808e-05	ins69QQ	1	1.63808e-05
E169Y	7	0.000114666	ins191LPHHVVAX	1	1.63808e-05	ins70stopEstopID	2	3.27617e-05
E180L	3	4.91425e-05	ins191RSA	1	1.63808e-05	ins70stopIG	1	1.63808e-05
E180M	1	1.63808e-05	ins191VPLLVPHHVV	1	1.63808e-05	ins70XQNKLD	5	8.19041e-05
E180N	17	0.000278474	ins192LXXX	1	1.63808e-05	ins70XXXXLD	3	4.91425e-05
E180S	8	0.000131047	ins192RGEIR	1	1.63808e-05	ins70XXXXXD	3	4.91425e-05
E180W	1	1.63808e-05	ins192TS	1	1.63808e-05	ins71NKLDH	1	1.63808e-05
E191H	2	3.27617e-05	ins193SLFSFLITstop	1	1.63808e-05	ins71SKLDH	1	1.63808e-05
E191M	2	3.27617e-05	ins193Y	1	1.63808e-05	ins72NK	1	1.63808e-05
E191R	2	3.27617e-05	ins195I	1	1.63808e-05	ins73DPAA	1	1.63808e-05
E191Y	1	1.63808e-05	ins196VQEI	1	1.63808e-05	ins74K	1	1.63808e-05
E224F	15	0.000245712	ins197LLLLEWLAMAVMLLLLCCCL	1	1.63808e-05	ins74stopSPVELLSQ	2	3.27617e-05
E224P	9	0.000147427	ins197XXXX	1	1.63808e-05	ins74XSQ	1	1.63808e-05
E281I	2	3.27617e-05	ins198VQEIN	1	1.63808e-05	ins74YL	1	1.63808e-05
E281P	6	9.8285e-05	ins199VGQS	1	1.63808e-05	ins76GS	2	3.27617e-05
E298C	1	1.63808e-05	ins19VR	1	1.63808e-05	ins76stopEstopstopstop	1	1.63808e-05
E298F	10	0.000163808	ins200RLLRRRE	1	1.63808e-05	ins7MLAN	3	4.91425e-05
E298L	16	0.000262093	ins201LLRRREQRRQSSLFSFLITstop	1	1.63808e-05	ins7T	4	6.55233e-05
E298N	16	0.000262093	ins202MTL	4	6.55233e-05	ins80Y	1	1.63808e-05
E298W	1	1.63808e-05	ins202S	10	0.000163808	ins81GN	1	1.63808e-05
E309C	3	4.91425e-05	ins203L	1	1.63808e-05	ins81R	1	1.63808e-05
E309H	17	0.000278474	ins203Q	1	1.63808e-05	ins82FRN	1	1.63808e-05
E309S	10	0.000163808	ins204R	3	4.91425e-05	ins82N	1	1.63808e-05
E309Y	1	1.63808e-05	ins204XstopIstop	1	1.63808e-05	ins82RN	1	1.63808e-05
E324C	1	1.63808e-05	ins205CGARSKQRRPQG	1	1.63808e-05	ins84stopAstopCGSATSLLLS	1	1.63808e-05
E324S	2	3.27617e-05	ins205stopS	1	1.63808e-05	ins85CSD	1	1.63808e-05
E324Y	1	1.63808e-05	ins205VQE	1	1.63808e-05	ins85FSD	1	1.63808e-05
E340C	1	1.63808e-05	ins206LFSFLITstopSQ	1	1.63808e-05	ins85LstopAstopCGSATSLLLSD	1	1.63808e-05
E340M	8	0.000131047	ins207GS	1	1.63808e-05	ins85QFK	1	1.63808e-05
E340N	2	3.27617e-05	ins208IQL	1	1.63808e-05	ins85SD	2	3.27617e-05
E340R	12	0.00019657	ins209HX	4	6.55233e-05	ins85stopD	1	1.63808e-05
E406C	1	1.63808e-05	ins209MAGNGGXXXXXXXXXXXXXXXXXXXXXXXXXXXXXXXXXKRTSPAR	2	3.27617e-05	ins85WGD	1	1.63808e-05
E406F	2	3.27617e-05	ins20L	2	3.27617e-05	ins87E	1	1.63808e-05
E406P	2	3.27617e-05	ins20LRFNWQstop	1	1.63808e-05	ins87F	1	1.63808e-05
E465C	1	1.63808e-05	ins20QIQLAV	14	0.000229332	ins87T	1	1.63808e-05
E465F	1	1.63808e-05	ins20QTNWQstop	1	1.63808e-05	ins88DCLRVRVPCGH	1	1.63808e-05
E465M	1	1.63808e-05	ins211SEI	1	1.63808e-05	ins89stop	1	1.63808e-05
E465W	6	9.8285e-05	ins211SES	1	1.63808e-05	ins90R	1	1.63808e-05
E465Z	2	3.27617e-05	ins211SESF	909	0.0148902	ins90SDCLRVR	1	1.63808e-05
E471C	10	0.000163808	ins211stopRKL	5	8.19041e-05	ins92R	1	1.63808e-05
E471H	2	3.27617e-05	ins211XXX	1	1.63808e-05	ins92S	1	1.63808e-05
E471S	619	0.0101397	ins211XXXX	27	0.000442282	ins93RVRVPC	2	3.27617e-05
E471W	1	1.63808e-05	ins212LFSFLITstopSQQFKKFNSRQQstopTNFSCstop	1	1.63808e-05	ins94YstopstopRQLAstopFA	1	1.63808e-05
E484F	1	1.63808e-05	ins212SNQ	1	1.63808e-05	ins95TSHP	1	1.63808e-05
E484N	4	6.55233e-05	ins212stop	1	1.63808e-05	ins96LRVRVPCGHL	1	1.63808e-05
E484P	237	0.00388226	ins213E	1	1.63808e-05	ins96RVPCGHS	2	3.27617e-05
E516I	2	3.27617e-05	ins213XXXXXXXXXXXXXXXXXXXXXXXXSCQEM	1	1.63808e-05	ins98Istop	1	1.63808e-05
E516M	1	1.63808e-05	ins214LLLLEWL	1	1.63808e-05	ins98QTVCAY	1	1.63808e-05
E516Y	3	4.91425e-05	ins215PQ	2	3.27617e-05	ins98XXX	2	3.27617e-05
E554N	1	1.63808e-05	ins216LLLLEW	1	1.63808e-05	ins98XXXXXXRTRSMW	1	1.63808e-05
E554W	1	1.63808e-05	ins216LLLLEWVAM	1	1.63808e-05	ins99CAYA	3	4.91425e-05
E583N	1	1.63808e-05	ins217ALALLLLXXXXXXXXXXXXXXXXXXXXXXXXXXXXXXXXXXNGGDA	2	3.27617e-05	ins99XX	1	1.63808e-05
E583S	4	6.55233e-05	ins218XXX	1	1.63808e-05	ins9P	1	1.63808e-05
E583T	1	1.63808e-05	ins224CCCLTDstop	1	1.63808e-05	K14D	1	1.63808e-05
E654H	2	3.27617e-05	ins224L	1	1.63808e-05	K14Y	2	3.27617e-05
E654P	2	3.27617e-05	ins224LLCCCLT	1	1.63808e-05	K15G	1	1.63808e-05
E661C	1	1.63808e-05	ins224XLL	1	1.63808e-05	K15H	1	1.63808e-05
E661M	1	1.63808e-05	ins225stopTSL	1	1.63808e-05	K15stop	1	1.63808e-05
E702H	6	9.8285e-05	ins226AKLS	1	1.63808e-05	K162stop	2	3.27617e-05
E702Y	1	1.63808e-05	ins226GFstopQI	1	1.63808e-05	K166L	1	1.63808e-05
E748T	1	1.63808e-05	ins226HFALKLVQSVK	1	1.63808e-05	K166Y	5	8.19041e-05
E773H	3	4.91425e-05	ins229LESKMSGXXXXXXXXXXXXXXXXXXXXXXXXXXXXXXXXXXDRLNQ	1	1.63808e-05	K180P	1	1.63808e-05
E773Y	1	1.63808e-05	ins22IQLAVTR	1	1.63808e-05	K180T	4	6.55233e-05
E780C	1	1.63808e-05	ins22QL	1	1.63808e-05	K180Y	1	1.63808e-05
E780M	1	1.63808e-05	ins230stop	2	3.27617e-05	K205C	1	1.63808e-05
E780P	3	4.91425e-05	ins231TASW	1	1.63808e-05	K205D	1	1.63808e-05
E780Y	1	1.63808e-05	ins234LRS	1	1.63808e-05	K205F	1	1.63808e-05
E868F	1	1.63808e-05	ins235LILRL	1	1.63808e-05	K205M	1	1.63808e-05
E868Y	1	1.63808e-05	ins237F	5	8.19041e-05	K205S	2	3.27617e-05
E918I	1	1.63808e-05	ins237GQQQQ	1	1.63808e-05	K205Y	2	3.27617e-05
E918L	1	1.63808e-05	ins239SCQ	1	1.63808e-05	K50M	1	1.63808e-05
E96C	3	4.91425e-05	ins23LAVTRM	1	1.63808e-05	K50T	5	8.19041e-05
E96M	1	1.63808e-05	ins241LRS	1	1.63808e-05	K50W	2	3.27617e-05
E990H	1	1.63808e-05	ins241XX	1	1.63808e-05	L102D	1	1.63808e-05
E990R	1	1.63808e-05	ins242GQTVTXXXXXXXXXXXXXXXXXXXXXXXXXXXXXXXXXXGKGQQQQ	1	1.63808e-05	L102E	2	3.27617e-05
E990Y	1	1.63808e-05	ins242SL	62	0.00101561	L102Q	4	6.55233e-05
F1042C	3	4.91425e-05	ins242SPTIVRstopVGDTQGstopD	1	1.63808e-05	L102R	6	9.8285e-05
F1042G	1	1.63808e-05	ins244FL	1	1.63808e-05	L119G	1	1.63808e-05
F1042T	1	1.63808e-05	ins244RHS	1	1.63808e-05	L119J	3	4.91425e-05
F1052A	1	1.63808e-05	ins245L	2	3.27617e-05	L119N	2	3.27617e-05
F1052D	1	1.63808e-05	ins247stopH	1	1.63808e-05	L119stop	1	1.63808e-05
F1052E	1	1.63808e-05	ins248PIILRLGSP	2	3.27617e-05	L120G	1	1.63808e-05
F1052K	2	3.27617e-05	ins249LL	1	1.63808e-05	L120K	1	1.63808e-05
F1062C	2	3.27617e-05	ins249T	1	1.63808e-05	L120N	2	3.27617e-05
F1062M	1	1.63808e-05	ins24A	1	1.63808e-05	L120stop	1	1.63808e-05
F1062P	2	3.27617e-05	ins24AVTRMV	1	1.63808e-05	L124A	2	3.27617e-05
F106H	1	1.63808e-05	ins24RMV	1	1.63808e-05	L124G	2	3.27617e-05
F106N	3	4.91425e-05	ins24VTTstop	1	1.63808e-05	L124H	7	0.000114666
F1075G	1	1.63808e-05	ins24VVTRMV	1	1.63808e-05	L124M	1	1.63808e-05
F1075I	2	3.27617e-05	ins251KGW	3	4.91425e-05	L129Y	1	1.63808e-05
F1075P	1	1.63808e-05	ins251stopGFR	1	1.63808e-05	L133E	2	3.27617e-05
F1075T	2	3.27617e-05	ins251XXXX	1	1.63808e-05	L133J	1	1.63808e-05
F1089M	2	3.27617e-05	ins252RGFstop	2	3.27617e-05	L133R	2	3.27617e-05
F1089N	1	1.63808e-05	ins252stop	4	6.55233e-05	L133Y	1	1.63808e-05
F1095A	1	1.63808e-05	ins253NLLL	1	1.63808e-05	L134E	1	1.63808e-05
F1095M	1	1.63808e-05	ins25QSRstopPNWLLPK	2	3.27617e-05	L134Y	2	3.27617e-05
F1095N	1	1.63808e-05	ins25V	1	1.63808e-05	L138C	1	1.63808e-05
F1095stop	1	1.63808e-05	ins260NVLPL	1	1.63808e-05	L138stop	1	1.63808e-05
F1103I	5	8.19041e-05	ins260NVPPL	1	1.63808e-05	L13C	1	1.63808e-05
F1103T	1	1.63808e-05	ins261P	1	1.63808e-05	L13J	1	1.63808e-05
F1103W	1	1.63808e-05	ins262TATKAYNVXXXXXXXXXXXXXXXXXXXXXXXXXXXXXXXXXPRQKR	1	1.63808e-05	L13M	1	1.63808e-05
F1109A	1	1.63808e-05	ins264stop	2	3.27617e-05	L13Q	2	3.27617e-05
F1109N	1	1.63808e-05	ins265AT	1	1.63808e-05	L13S	2	3.27617e-05
F1121G	1	1.63808e-05	ins267N	1	1.63808e-05	L13W	2	3.27617e-05
F1121P	1	1.63808e-05	ins267SMstop	1	1.63808e-05	L149M	2	3.27617e-05
F1121T	1	1.63808e-05	ins267XXstop	1	1.63808e-05	L156C	11	0.000180189
F1121W	4	6.55233e-05	ins268CHstopSIQC	2	3.27617e-05	L156Y	10	0.000163808
F1148A	1	1.63808e-05	ins268KCNT	1	1.63808e-05	L164F	5	8.19041e-05
F1148V	2	3.27617e-05	ins268Kstop	1	1.63808e-05	L164G	1	1.63808e-05
F1156C	1	1.63808e-05	ins269I	1	1.63808e-05	L164H	1	1.63808e-05
F1220D	1	1.63808e-05	ins26RstopPNWLLPKSYQT	1	1.63808e-05	L16A	21	0.000343997
F1220R	1	1.63808e-05	ins26stopP	1	1.63808e-05	L16C	1	1.63808e-05
F1256G	1	1.63808e-05	ins271W	2	3.27617e-05	L16M	12	0.00019657
F1256H	2	3.27617e-05	ins275ADVV	1	1.63808e-05	L176C	11	0.000180189
F1256K	1	1.63808e-05	ins275DVV	7	0.000114666	L176E	1	1.63808e-05
F1256V	1	1.63808e-05	ins275VV	1	1.63808e-05	L176H	5	8.19041e-05
F133G	5	8.19041e-05	ins276F	1	1.63808e-05	L176J	3	4.91425e-05
F135D	3	4.91425e-05	ins276TWS	4	6.55233e-05	L176M	2	3.27617e-05
F140N	11	0.000180189	ins277IQN	2	3.27617e-05	L176S	11	0.000180189
F157H	5	8.19041e-05	ins277XXXVstopLVP	1	1.63808e-05	L17E	6	9.8285e-05
F157M	2	3.27617e-05	ins278LNK	1	1.63808e-05	L17H	5	8.19041e-05
F157Q	4	6.55233e-05	ins279RKFW	2	3.27617e-05	L17Q	1	1.63808e-05
F157T	11	0.000180189	ins27RM	1	1.63808e-05	L17R	1	1.63808e-05
F168A	16	0.000262093	ins27W	8	0.000131047	L17Y	1	1.63808e-05
F168H	1	1.63808e-05	ins282PRKXLG	1	1.63808e-05	L181D	8	0.000131047
F168M	6	9.8285e-05	ins287ARNstopS	1	1.63808e-05	L181K	3	4.91425e-05
F168P	5	8.19041e-05	ins287GTRNstopS	1	1.63808e-05	L181N	2	3.27617e-05
F175A	25	0.000409521	ins287HFA	1	1.63808e-05	L206A	1	1.63808e-05
F175G	8	0.000131047	ins287TEQS	1	1.63808e-05	L206del	6	9.8285e-05
F175H	2	3.27617e-05	ins28MV	1	1.63808e-05	L206Q	3	4.91425e-05
F175P	6	9.8285e-05	ins28V	1	1.63808e-05	L206Y	3	4.91425e-05
F175R	9	0.000147427	ins291XX	1	1.63808e-05	L219V	3	4.91425e-05
F175stop	35	0.000573329	ins292XXX	1	1.63808e-05	L219W	3	4.91425e-05
F175T	24	0.00039314	ins294ELTNI	1	1.63808e-05	L220I	4	6.55233e-05
F186G	1	1.63808e-05	ins297FC	3	4.91425e-05	L220V	4	6.55233e-05
F186K	3	4.91425e-05	ins298CYSLFstopLCLLSFGSHLN	1	1.63808e-05	L22A	2	3.27617e-05
F186R	2	3.27617e-05	ins298T	1	1.63808e-05	L22E	2	3.27617e-05
F186T	3	4.91425e-05	ins29G	1	1.63808e-05	L22K	2	3.27617e-05
F186W	4	6.55233e-05	ins29XW	1	1.63808e-05	L22T	2	3.27617e-05
F192D	1	1.63808e-05	ins300CYSLFstopLCLLSFGSHLNCKII	1	1.63808e-05	L27A	1	1.63808e-05
F192E	1	1.63808e-05	ins300Nstop	2	3.27617e-05	L27C	1	1.63808e-05
F192H	1	1.63808e-05	ins300NstopL	1	1.63808e-05	L27F	12	0.00019657
F194E	20	0.000327617	ins300TFLstopTIstopERCSXXXX	1	1.63808e-05	L27G	2	3.27617e-05
F194G	1	1.63808e-05	ins300XXXXXXXCMLstop	1	1.63808e-05	L27H	1	1.63808e-05
F194M	1	1.63808e-05	ins301A	1	1.63808e-05	L27R	2	3.27617e-05
F194R	1	1.63808e-05	ins301ANCAIC	1	1.63808e-05	L29E	1	1.63808e-05
F194T	3	4.91425e-05	ins303SstopV	1	1.63808e-05	L29Q	2	3.27617e-05
F201D	1	1.63808e-05	ins306stop	1	1.63808e-05	L34E	1	1.63808e-05
F201E	1	1.63808e-05	ins307AFLLFLVLIMLIIFWFSLELQDHN	1	1.63808e-05	L34G	4	6.55233e-05
F201G	1	1.63808e-05	ins307P	1	1.63808e-05	L34H	4	6.55233e-05
F201H	88	0.00144151	ins308ANstopNC	1	1.63808e-05	L34K	1	1.63808e-05
F201Q	1	1.63808e-05	ins308NC	1	1.63808e-05	L34N	2	3.27617e-05
F201T	3	4.91425e-05	ins30G	1	1.63808e-05	L34Q	1	1.63808e-05
F220E	1	1.63808e-05	ins30GGAIK	1	1.63808e-05	L34stop	2	3.27617e-05
F220G	1	1.63808e-05	ins30VT	1	1.63808e-05	L34T	2	3.27617e-05
F220T	3	4.91425e-05	ins30WGAIK	5	8.19041e-05	L34W	2	3.27617e-05
F220W	16	0.000262093	ins30YC	1	1.63808e-05	L34Y	2	3.27617e-05
F238C	4	6.55233e-05	ins310ASAFFGMSDQELIRQGTDYKHWPQIAQFAPS	1	1.63808e-05	L35D	2	3.27617e-05
F238G	2	3.27617e-05	ins310ASAFFGMSRIQGTDYKHWPQIAQFAPS	1	1.63808e-05	L35E	2	3.27617e-05
F238Q	1	1.63808e-05	ins310P	1	1.63808e-05	L35F	3	4.91425e-05
F238W	3	4.91425e-05	ins311SAFFGXXXXXXXXXXXXXXXXXXXXXXXXXXXXXXXXXIAQFAPSA	1	1.63808e-05	L35G	3	4.91425e-05
F275H	1	1.63808e-05	ins312RSSECR	1	1.63808e-05	L35H	5	8.19041e-05
F275N	2	3.27617e-05	ins314HFSV	1	1.63808e-05	L35N	1	1.63808e-05
F275P	3	4.91425e-05	ins317SRIGMEVTPSXIAQFAPSASAFFGM	1	1.63808e-05	L35P	5	8.19041e-05
F275T	3	4.91425e-05	ins31GPKVYLIIL	2	3.27617e-05	L35R	13	0.000212951
F275W	2	3.27617e-05	ins31W	1	1.63808e-05	L35T	8	0.000131047
F2A	1	1.63808e-05	ins320AHWH	1	1.63808e-05	L35W	5	8.19041e-05
F2K	1	1.63808e-05	ins320CstopXXXXXXXXXXXXXXXXXXXX	1	1.63808e-05	L46E	1	1.63808e-05
F2W	1	1.63808e-05	ins320RALAWKSHLRER	1	1.63808e-05	L46M	3	4.91425e-05
F306E	5	8.19041e-05	ins320RERGstop	1	1.63808e-05	L46P	1	1.63808e-05
F306H	6	9.8285e-05	ins323VTPSGTWLXXXQFAPSASAFFGMSRIGME	1	1.63808e-05	L46Q	1	1.63808e-05
F306M	13	0.000212951	ins324DLQ	1	1.63808e-05	L46S	4	6.55233e-05
F306Q	1	1.63808e-05	ins325SERGstopPTQV	1	1.63808e-05	L46W	1	1.63808e-05
F306stop	2	3.27617e-05	ins326SGTWLTYTGMSRIGMEVTP	1	1.63808e-05	L51M	2	3.27617e-05
F306T	7	0.000114666	ins326stopRFCstop	1	1.63808e-05	L51Q	2	3.27617e-05
F306W	2	3.27617e-05	ins330GNV	1	1.63808e-05	L51T	1	1.63808e-05
F318D	1	1.63808e-05	ins335stopPHR	1	1.63808e-05	L54A	4	6.55233e-05
F318H	3	4.91425e-05	ins337DLHRCH	1	1.63808e-05	L54E	1	1.63808e-05
F318W	1	1.63808e-05	ins33XX	1	1.63808e-05	L54H	3	4.91425e-05
F329C	4	6.55233e-05	ins341KQRATLSSNstopstopGEE	1	1.63808e-05	L54T	3	4.91425e-05
F329G	1	1.63808e-05	ins341Y	1	1.63808e-05	L57J	2	3.27617e-05
F329K	2	3.27617e-05	ins342IKFQR	1	1.63808e-05	L57K	1	1.63808e-05
F329N	1	1.63808e-05	ins344ALQ	1	1.63808e-05	L62A	3	4.91425e-05
F329Q	1	1.63808e-05	ins345L	1	1.63808e-05	L62J	1	1.63808e-05
F329T	1	1.63808e-05	ins346stopstop	1	1.63808e-05	L62Q	4	6.55233e-05
F329Y	9	0.000147427	ins348NTPINQIXXXXXXDIH	1	1.63808e-05	L67H	9	0.000147427
F32D	2	3.27617e-05	ins349SFCstopIS	3	4.91425e-05	L67S	1	1.63808e-05
F32G	1	1.63808e-05	ins34LPGTIL	1	1.63808e-05	L67T	4	6.55233e-05
F32H	3	4.91425e-05	ins350CstopIS	1	1.63808e-05	L67W	2	3.27617e-05
F32N	1	1.63808e-05	ins351APSASAFFGM	1	1.63808e-05	L87H	4	6.55233e-05
F32R	1	1.63808e-05	ins351LDYKHWPQIAQFAPSASAFFGMSRIGMEVTPSGTWLTYTGAIKLDDKDPNFKDQVI	2	3.27617e-05	L87M	1	1.63808e-05
F338C	4	6.55233e-05	ins355Fstop	1	1.63808e-05	L87stop	1	1.63808e-05
F338D	1	1.63808e-05	ins357DAYKTXXXXXXXXXXXXXXXXXXXXXXXXXXXXXXXXXXILLNKHI	2	3.27617e-05	L87T	1	1.63808e-05
F338G	2	3.27617e-05	ins358XXXXX	1	1.63808e-05	L90D	1	1.63808e-05
F338J	1	1.63808e-05	ins360NG	1	1.63808e-05	L90Q	7	0.000114666
F338stop	5	8.19041e-05	ins360stopR	1	1.63808e-05	L90W	7	0.000114666
F338T	1	1.63808e-05	ins361TFPPTEPTCQQQQGQ	1	1.63808e-05	L93H	6	9.8285e-05
F342C	2	3.27617e-05	ins362CLLYTSPSPRDNQPHLV	1	1.63808e-05	L93K	1	1.63808e-05
F342G	4	6.55233e-05	ins363NILS	1	1.63808e-05	M109C	6	9.8285e-05
F342M	1	1.63808e-05	ins364XXXXXXXXXXXXXXXXXXXX	1	1.63808e-05	M109F	2	3.27617e-05
F342N	2	3.27617e-05	ins365T	3	4.91425e-05	M84F	1	1.63808e-05
F342P	1	1.63808e-05	ins366C	1	1.63808e-05	M84Y	2	3.27617e-05
F342Q	1	1.63808e-05	ins366CLLYTSPSPR	1	1.63808e-05	M91G	2	3.27617e-05
F342T	2	3.27617e-05	ins368K	6	9.8285e-05	M91R	8	0.000131047
F342W	1	1.63808e-05	ins36L	2	3.27617e-05	M91Y	5	8.19041e-05
F347A	1	1.63808e-05	ins370KKPETPP	1	1.63808e-05	N113B	4	6.55233e-05
F347G	2	3.27617e-05	ins370KNGG	9	0.000147427	N113F	1	1.63808e-05
F347N	3	4.91425e-05	ins370KPETPPF	1	1.63808e-05	N113V	1	1.63808e-05
F347Q	1	1.63808e-05	ins371KPETPPF	1	1.63808e-05	N117E	1	1.63808e-05
F347T	4	6.55233e-05	ins374LM	1	1.63808e-05	N117L	1	1.63808e-05
F374K	2	3.27617e-05	ins376DEX	1	1.63808e-05	N117Q	2	3.27617e-05
F374M	1	1.63808e-05	ins379C	2	3.27617e-05	N117R	1	1.63808e-05
F374N	3	4.91425e-05	ins382PQRQKKQQXXXXXXXXXXXXXXXXXXXXXXXXXXXXXXXXXETQAL	1	1.63808e-05	N121E	1	1.63808e-05
F377E	1	1.63808e-05	ins382PQRQKKQXXXXXXXXXXXXXXXXXXXXXXXXXXXXXXXXXXETQAL	1	1.63808e-05	N121I	2	3.27617e-05
F377N	1	1.63808e-05	ins382RF	7	0.000114666	N121P	2	3.27617e-05
F377R	10	0.000163808	ins383QRQKHFAEstopDQQSLKRTKRRRLMKLKPHIDAYKTFPPTEPKKDKKKKADETQALP	1	1.63808e-05	N203B	6	9.8285e-05
F377T	1	1.63808e-05	ins384L	1	1.63808e-05	N203C	1	1.63808e-05
F377W	1	1.63808e-05	ins384XXXXXXXXXXXXXXXXXXX	1	1.63808e-05	N203P	2	3.27617e-05
F392A	1	1.63808e-05	ins387XX	1	1.63808e-05	N203V	1	1.63808e-05
F392E	1	1.63808e-05	ins389KD	1	1.63808e-05	N207G	2	3.27617e-05
F392G	3	4.91425e-05	ins389PG	1	1.63808e-05	N207V	1	1.63808e-05
F392N	1	1.63808e-05	ins38LII	1	1.63808e-05	N216A	1	1.63808e-05
F400D	2	3.27617e-05	ins391SHFAEstopAYstop	1	1.63808e-05	N216del	1	1.63808e-05
F400G	3	4.91425e-05	ins393LLPAADXXXXXXXXXXXXXXXXXXXXXXXXXXXXXXXXXXKQQTVT	1	1.63808e-05	N21F	2	3.27617e-05
F400P	1	1.63808e-05	ins396A	1	1.63808e-05	N21I	2	3.27617e-05
F400W	2	3.27617e-05	ins39IIL	7	0.000114666	N21P	3	4.91425e-05
F429E	1	1.63808e-05	ins39stopHW	1	1.63808e-05	N21Y	3	4.91425e-05
F429K	2	3.27617e-05	ins39YPIIL	1	1.63808e-05	N41E	1	1.63808e-05
F429Q	2	3.27617e-05	ins400RH	1	1.63808e-05	N41F	2	3.27617e-05
F429R	1	1.63808e-05	ins403XKXXQQSMSSNITK	1	1.63808e-05	N41P	1	1.63808e-05
F429T	3	4.91425e-05	ins403XXXXXXSMSSNITK	1	1.63808e-05	N43M	2	3.27617e-05
F43A	3	4.91425e-05	ins404TFPPXXXXXXXXXXXXXX	1	1.63808e-05	N43P	1	1.63808e-05
F43C	2	3.27617e-05	ins409I	1	1.63808e-05	N43Q	1	1.63808e-05
F43D	11	0.000180189	ins40F	1	1.63808e-05	N43R	1	1.63808e-05
F43G	4	6.55233e-05	ins40V	3	4.91425e-05	N43T	4	6.55233e-05
F43I	7	0.000114666	ins40VGPKV	1	1.63808e-05	N5E	1	1.63808e-05
F43P	2	3.27617e-05	ins40XXXXXSAP	1	1.63808e-05	N5F	2	3.27617e-05
F43W	3	4.91425e-05	ins411IPL	1	1.63808e-05	N74C	2	3.27617e-05
F456R	2	3.27617e-05	ins413NITKAKQLQQSMSR	2	3.27617e-05	N74L	1	1.63808e-05
F464A	1	1.63808e-05	ins41G	2	3.27617e-05	N74stop	2	3.27617e-05
F464K	2	3.27617e-05	ins41LGS	1	1.63808e-05	N74V	3	4.91425e-05
F486C	2	3.27617e-05	ins41NVG	1	1.63808e-05	P114G	1	1.63808e-05
F486D	1	1.63808e-05	ins41PG	1	1.63808e-05	P123I	1	1.63808e-05
F486G	1	1.63808e-05	ins41VG	2	3.27617e-05	P123V	2	3.27617e-05
F486H	2	3.27617e-05	ins42F	1	1.63808e-05	P123Y	1	1.63808e-05
F486P	131	0.00214589	ins42II	1	1.63808e-05	P165D	1	1.63808e-05
F486Q	1	1.63808e-05	ins42L	1	1.63808e-05	P165H	3	4.91425e-05
F486stop	4	6.55233e-05	ins42LVHRSHSTW	1	1.63808e-05	P165N	1	1.63808e-05
F490A	2	3.27617e-05	ins43FTQstopYC	1	1.63808e-05	P165V	2	3.27617e-05
F490M	4	6.55233e-05	ins43stopYC	1	1.63808e-05	P59F	3	4.91425e-05
F490Q	10	0.000163808	ins43stopYCV	1	1.63808e-05	P59I	1	1.63808e-05
F490T	5	8.19041e-05	ins43VYLIILRL	1	1.63808e-05	P59N	8	0.000131047
F497A	1	1.63808e-05	ins44FTQstopYCVL	1	1.63808e-05	Q185D	1	1.63808e-05
F497C	6	9.8285e-05	ins44FYPII	1	1.63808e-05	Q185P	1	1.63808e-05
F497G	3	4.91425e-05	ins44RPstop	1	1.63808e-05	Q185Z	1	1.63808e-05
F497K	3	4.91425e-05	ins44stop	1	1.63808e-05	Q19A	2	3.27617e-05
F497N	5	8.19041e-05	ins44TQstopYCVL	4	6.55233e-05	Q19D	9	0.000147427
F497P	1	1.63808e-05	ins44TQYCVL	1	1.63808e-05	Q19L	1	1.63808e-05
F497stop	1	1.63808e-05	ins44TWQGRPstop	1	1.63808e-05	Q19V	1	1.63808e-05
F497T	14	0.000229332	ins44YCVL	2	3.27617e-05	Q222K	2	3.27617e-05
F4M	1	1.63808e-05	ins44YQstopYCVL	1	1.63808e-05	Q36C	3	4.91425e-05
F4R	2	3.27617e-05	ins45H	2	3.27617e-05	Q36F	3	4.91425e-05
F515D	1	1.63808e-05	ins45LQstop	1	1.63808e-05	Q36G	16	0.000262093
F541C	3	4.91425e-05	ins45LQstopYCVLV	1	1.63808e-05	Q36I	3	4.91425e-05
F541V	4	6.55233e-05	ins45LQstopYRVLV	1	1.63808e-05	Q36W	5	8.19041e-05
F541W	2	3.27617e-05	ins45PQstopYCVLIP	2	3.27617e-05	Q36Y	2	3.27617e-05
F543N	1	1.63808e-05	ins46C	1	1.63808e-05	R101A	2	3.27617e-05
F559E	1	1.63808e-05	ins46IILRFG	1	1.63808e-05	R101D	1	1.63808e-05
F559G	1	1.63808e-05	ins46ITLRLGS	1	1.63808e-05	R101L	6	9.8285e-05
F559Y	2	3.27617e-05	ins46VLV	1	1.63808e-05	R101V	1	1.63808e-05
F55A	2	3.27617e-05	ins47IL	2	3.27617e-05	R101W	1	1.63808e-05
F55G	3	4.91425e-05	ins47ILRLG	1	1.63808e-05	R105E	2	3.27617e-05
F55P	1	1.63808e-05	ins47ILRLGSP	1	1.63808e-05	R105W	3	4.91425e-05
F55Q	1	1.63808e-05	ins47L	1	1.63808e-05	R107I	4	6.55233e-05
F55T	13	0.000212951	ins47NTASWFTALTQHGKEDLKFPRGQGVPINTNSSPDDQIGYYRRATRRIRGGDGPN	1	1.63808e-05	R107K	1	1.63808e-05
F562K	1	1.63808e-05	ins47stopC	1	1.63808e-05	R131E	2	3.27617e-05
F562P	2	3.27617e-05	ins47stopYCVLVHR	6	9.8285e-05	R146A	4	6.55233e-05
F562stop	1	1.63808e-05	ins48APRF	9	0.000147427	R146E	1	1.63808e-05
F562T	1	1.63808e-05	ins48APRFTQstopGPKV	1	1.63808e-05	R146G	2	3.27617e-05
F565D	1	1.63808e-05	ins4DWR	1	1.63808e-05	R146P	3	4.91425e-05
F58T	4	6.55233e-05	ins50P	1	1.63808e-05	R146V	1	1.63808e-05
F592R	2	3.27617e-05	ins50stopYCEI	1	1.63808e-05	R150F	2	3.27617e-05
F592stop	1	1.63808e-05	ins51Fstopstop	1	1.63808e-05	R158D	1	1.63808e-05
F59A	1	1.63808e-05	ins51TAS	1	1.63808e-05	R158F	4	6.55233e-05
F59Q	4	6.55233e-05	ins51WFTALTQHGKEDLKFPRGQGVPINTNSSPDDQIGYYRRATRRIRGGDGAS	1	1.63808e-05	R174S	3	4.91425e-05
F643G	2	3.27617e-05	ins51WFTALTQHGXXXXXXXXXXXXXXXXXXXXXXXXXXXXXXXXXNTAS	1	1.63808e-05	R174V	1	1.63808e-05
F643K	1	1.63808e-05	ins51XX	2	3.27617e-05	R186D	1	1.63808e-05
F643Y	7	0.000114666	ins52SPLSLN	1	1.63808e-05	R186E	1	1.63808e-05
F65D	1	1.63808e-05	ins52YL	2	3.27617e-05	R186K	1	1.63808e-05
F65K	2	3.27617e-05	ins53FG	1	1.63808e-05	R186stop	1	1.63808e-05
F65P	2	3.27617e-05	ins53HR	1	1.63808e-05	R186T	1	1.63808e-05
F718Q	2	3.27617e-05	ins53LIILRLG	1	1.63808e-05	R186Y	1	1.63808e-05
F718R	1	1.63808e-05	ins53P	1	1.63808e-05	R198F	1	1.63808e-05
F718stop	1	1.63808e-05	ins53QstopYCVLVHR	1	1.63808e-05	R198P	6	9.8285e-05
F759A	2	3.27617e-05	ins53YR	1	1.63808e-05	R198stop	2	3.27617e-05
F759G	1	1.63808e-05	ins54L	3	4.91425e-05	R200E	1	1.63808e-05
F759Q	1	1.63808e-05	ins54QstopCVLVH	1	1.63808e-05	R200stop	2	3.27617e-05
F759R	1	1.63808e-05	ins54QstopYCVLST	1	1.63808e-05	R42C	1	1.63808e-05
F759T	2	3.27617e-05	ins54QstopYCVLVH	1	1.63808e-05	R42F	1	1.63808e-05
F782D	1	1.63808e-05	ins54QstopYGDL	1	1.63808e-05	R44A	1	1.63808e-05
F782stop	1	1.63808e-05	ins54stopY	2	3.27617e-05	R44E	1	1.63808e-05
F782V	3	4.91425e-05	ins54stopYCVLVHL	1	1.63808e-05	R44P	2	3.27617e-05
F797A	3	4.91425e-05	ins55L	1	1.63808e-05	R44stop	4	6.55233e-05
F797H	5	8.19041e-05	ins55PH	1	1.63808e-05	S108I	2	3.27617e-05
F797K	1	1.63808e-05	ins55R	1	1.63808e-05	S108L	1	1.63808e-05
F797stop	1	1.63808e-05	ins55SH	2	3.27617e-05	S108Q	1	1.63808e-05
F79A	2	3.27617e-05	ins55stop	1	1.63808e-05	S111D	1	1.63808e-05
F79E	1	1.63808e-05	ins55stopYCVLVHR	2	3.27617e-05	S111I	3	4.91425e-05
F79Q	1	1.63808e-05	ins55stopYCVLVHRLH	1	1.63808e-05	S111Q	2	3.27617e-05
F79R	4	6.55233e-05	ins55stopYY	1	1.63808e-05	S111R	2	3.27617e-05
F800C	4	6.55233e-05	ins55T	1	1.63808e-05	S111T	3	4.91425e-05
F800D	1	1.63808e-05	ins56GK	1	1.63808e-05	S136H	1	1.63808e-05
F800E	1	1.63808e-05	ins56HRPHS	1	1.63808e-05	S136P	2	3.27617e-05
F800P	2	3.27617e-05	ins56HRS	1	1.63808e-05	S173F	1	1.63808e-05
F800Q	1	1.63808e-05	ins56HRSHS	2	3.27617e-05	S173G	1	1.63808e-05
F800W	1	1.63808e-05	ins56K	1	1.63808e-05	S173V	1	1.63808e-05
F802A	1	1.63808e-05	ins56LNMARK	3	4.91425e-05	S177E	1	1.63808e-05
F802N	1	1.63808e-05	ins56NMARK	1	1.63808e-05	S177H	1	1.63808e-05
F802P	1	1.63808e-05	ins56STWQRK	1	1.63808e-05	S177K	2	3.27617e-05
F802T	1	1.63808e-05	ins56VHRPHS	1	1.63808e-05	S177M	1	1.63808e-05
F817C	2	3.27617e-05	ins56YS	1	1.63808e-05	S184D	1	1.63808e-05
F817K	3	4.91425e-05	ins56YSTWQRK	1	1.63808e-05	S184E	4	6.55233e-05
F817P	1	1.63808e-05	ins57HRSH	1	1.63808e-05	S184G	1	1.63808e-05
F817Q	1	1.63808e-05	ins57HRSP	3	4.91425e-05	S184K	1	1.63808e-05
F817W	4	6.55233e-05	ins57L	1	1.63808e-05	S184N	2	3.27617e-05
F823H	2	3.27617e-05	ins57PLSL	1	1.63808e-05	S184Q	1	1.63808e-05
F823W	5	8.19041e-05	ins58R	1	1.63808e-05	S191G	4	6.55233e-05
F833G	1	1.63808e-05	ins58RS	1	1.63808e-05	S191N	1	1.63808e-05
F855M	1	1.63808e-05	ins58SHstop	1	1.63808e-05	S191V	1	1.63808e-05
F855P	2	3.27617e-05	ins58SSLNMARKRPstop	2	3.27617e-05	S191Y	2	3.27617e-05
F86N	1	1.63808e-05	ins59L	1	1.63808e-05	S197A	1	1.63808e-05
F888A	1	1.63808e-05	ins59LGSPLSPNM	2	3.27617e-05	S197D	2	3.27617e-05
F888K	1	1.63808e-05	ins59M	2	3.27617e-05	S197stop	2	3.27617e-05
F888T	2	3.27617e-05	ins59S	1	1.63808e-05	S211H	1	1.63808e-05
F898A	1	1.63808e-05	ins59STstop	1	1.63808e-05	S212del	1	1.63808e-05
F898G	1	1.63808e-05	ins59V	1	1.63808e-05	S213del	1	1.63808e-05
F898V	2	3.27617e-05	ins5I	1	1.63808e-05	S213K	1	1.63808e-05
F927A	1	1.63808e-05	ins5T	1	1.63808e-05	S213R	38	0.000622472
F927H	1	1.63808e-05	ins60LNMA	1	1.63808e-05	S214H	2	3.27617e-05
F927stop	1	1.63808e-05	ins60NstopH	1	1.63808e-05	S214Q	1	1.63808e-05
F92D	1	1.63808e-05	ins60Q	1	1.63808e-05	S4L	3	4.91425e-05
F92E	1	1.63808e-05	ins61LKFL	1	1.63808e-05	S94D	1	1.63808e-05
F92Q	3	4.91425e-05	ins61PstopIPL	1	1.63808e-05	S94H	5	8.19041e-05
F970D	1	1.63808e-05	ins61PstopIPS	1	1.63808e-05	S99D	1	1.63808e-05
F970E	1	1.63808e-05	ins61stopHQstopKSRstop	1	1.63808e-05	S99E	1	1.63808e-05
F970K	1	1.63808e-05	ins62GLGD	1	1.63808e-05	S99V	2	3.27617e-05
F970M	1	1.63808e-05	ins62L	2	3.27617e-05	T106F	1	1.63808e-05
G103H	1	1.63808e-05	ins62LNSLG	1	1.63808e-05	T106I	3	4.91425e-05
G103I	3	4.91425e-05	ins64CLR	1	1.63808e-05	T116E	1	1.63808e-05
G103M	2	3.27617e-05	ins64LS	1	1.63808e-05	T116G	1	1.63808e-05
G103P	1	1.63808e-05	ins64MCFLAFLLFLVLIMLIIFWFSLEL	1	1.63808e-05	T116K	1	1.63808e-05
G1044F	1	1.63808e-05	ins64R	1	1.63808e-05	T116M	1	1.63808e-05
G1044K	3	4.91425e-05	ins65LAD	1	1.63808e-05	T116W	1	1.63808e-05
G1044Q	1	1.63808e-05	ins65RKTstop	2	3.27617e-05	T116Y	1	1.63808e-05
G1044Y	1	1.63808e-05	ins65Tstop	1	1.63808e-05	T127R	1	1.63808e-05
G1046P	1	1.63808e-05	ins66QLT	1	1.63808e-05	T130C	3	4.91425e-05
G1059E	1	1.63808e-05	ins67LTPI	2	3.27617e-05	T130K	1	1.63808e-05
G1059M	1	1.63808e-05	ins67P	4	6.55233e-05	T130M	1	1.63808e-05
G1059P	1	1.63808e-05	ins67S	1	1.63808e-05	T169E	1	1.63808e-05
G1059S	13	0.000212951	ins67SRT	1	1.63808e-05	T169V	1	1.63808e-05
G107M	2	3.27617e-05	ins67SRTRRSNstopH	1	1.63808e-05	T172M	2	3.27617e-05
G107stop	3	4.91425e-05	ins68KTLN	1	1.63808e-05	T175D	1	1.63808e-05
G1085I	1	1.63808e-05	ins68SP	1	1.63808e-05	T175H	1	1.63808e-05
G1085P	1	1.63808e-05	ins68SPT	6	9.8285e-05	T175stop	20	0.000327617
G1085T	2	3.27617e-05	ins68stop	1	1.63808e-05	T208C	1	1.63808e-05
G1093E	1	1.63808e-05	ins68TPIA	1	1.63808e-05	T208H	1	1.63808e-05
G1093F	1	1.63808e-05	ins69AF	2	3.27617e-05	T208L	1	1.63808e-05
G1093P	1	1.63808e-05	ins69AKK	1	1.63808e-05	T208V	1	1.63808e-05
G1093Y	1	1.63808e-05	ins69CSF	1	1.63808e-05	T30C	1	1.63808e-05
G1099F	1	1.63808e-05	ins69D	1	1.63808e-05	T30D	2	3.27617e-05
G1124K	1	1.63808e-05	ins69DKAF	1	1.63808e-05	T30F	11	0.000180189
G1124W	1	1.63808e-05	ins69F	5	8.19041e-05	T30G	3	4.91425e-05
G1131D	2	3.27617e-05	ins69HLF	1	1.63808e-05	T30M	2	3.27617e-05
G1131I	1	1.63808e-05	ins69HRF	1	1.63808e-05	T30Q	1	1.63808e-05
G1131K	2	3.27617e-05	ins69KAF	1	1.63808e-05	T30V	5	8.19041e-05
G1131L	2	3.27617e-05	ins69P	1	1.63808e-05	T61P	1	1.63808e-05
G1131W	1	1.63808e-05	ins69PIAV	1	1.63808e-05	T61Q	2	3.27617e-05
G1131Y	1	1.63808e-05	ins69RR	1	1.63808e-05	T61Y	1	1.63808e-05
G1167M	1	1.63808e-05	ins69RRSNstopHQstopQI	2	3.27617e-05	T77K	1	1.63808e-05
G1167Y	2	3.27617e-05	ins69W	1	1.63808e-05	T7F	2	3.27617e-05
G1171L	3	4.91425e-05	ins6L	1	1.63808e-05	T9L	1	1.63808e-05
G1171P	1	1.63808e-05	ins6LKI	1	1.63808e-05	V10S	1	1.63808e-05
G1204D	1	1.63808e-05	ins70PN	1	1.63808e-05	V10T	1	1.63808e-05
G1204I	3	4.91425e-05	ins71FEDK	1	1.63808e-05	V10W	1	1.63808e-05
G1219E	3	4.91425e-05	ins71FQLTPIA	1	1.63808e-05	V122D	3	4.91425e-05
G1219K	1	1.63808e-05	ins71QL	1	1.63808e-05	V122H	2	3.27617e-05
G1219N	1	1.63808e-05	ins71RFQL	1	1.63808e-05	V139W	1	1.63808e-05
G1219P	2	3.27617e-05	ins71RstopPNWL	1	1.63808e-05	V143A	5	8.19041e-05
G1219Y	1	1.63808e-05	ins71SNstopHQstopQSRstopPNWL	3	4.91425e-05	V143E	1	1.63808e-05
G1223H	1	1.63808e-05	ins71ST	1	1.63808e-05	V143I	2	3.27617e-05
G1223K	1	1.63808e-05	ins71stop	5	8.19041e-05	V143R	1	1.63808e-05
G1223P	1	1.63808e-05	ins71stopV	1	1.63808e-05	V170G	6	9.8285e-05
G1223Q	1	1.63808e-05	ins72CP	1	1.63808e-05	V187E	3	4.91425e-05
G1223R	1	1.63808e-05	ins72MKLVT	1	1.63808e-05	V187F	3	4.91425e-05
G1223T	1	1.63808e-05	ins72PINTNSSPXXXXXXXXXXXXXXXXXXXXXXXXXXXXXXXXXRGQGV	1	1.63808e-05	V187K	1	1.63808e-05
G1246F	2	3.27617e-05	ins72QLT	2	3.27617e-05	V221stop	1	1.63808e-05
G1246H	1	1.63808e-05	ins72QLTPIAVRstop	1	1.63808e-05	V23E	5	8.19041e-05
G1246I	1	1.63808e-05	ins72SRstop	1	1.63808e-05	V23N	2	3.27617e-05
G1251Q	1	1.63808e-05	ins73IAVQMTKF	1	1.63808e-05	V23Q	1	1.63808e-05
G1267L	1	1.63808e-05	ins73KL	4	6.55233e-05	V60R	2	3.27617e-05
G1267Y	1	1.63808e-05	ins73NstopHRQQSRstopPNW	1	1.63808e-05	V60W	1	1.63808e-05
G142Q	3	4.91425e-05	ins73NW	2	3.27617e-05	V60Y	2	3.27617e-05
G181H	1	1.63808e-05	ins73SRTRRS	1	1.63808e-05	V66N	1	1.63808e-05
G181K	10	0.000163808	ins73stop	13	0.000212951	V66R	1	1.63808e-05
G181Q	1	1.63808e-05	ins73stopIL	2	3.27617e-05	V70P	1	1.63808e-05
G181Y	2	3.27617e-05	ins73stopIPSK	1	1.63808e-05	V70Q	6	9.8285e-05
G184E	7	0.000114666	ins73stopIPSR	3	4.91425e-05	V70R	2	3.27617e-05
G184P	1	1.63808e-05	ins74AVQMTKFA	1	1.63808e-05	V70S	3	4.91425e-05
G184Q	1	1.63808e-05	ins74AVQTKLA	1	1.63808e-05	V70W	1	1.63808e-05
G184W	2	3.27617e-05	ins74AVRstopPKLA	1	1.63808e-05	V88G	2	3.27617e-05
G199I	3	4.91425e-05	ins74AVRstopPNWLLPKSY	3	4.91425e-05	V88N	3	4.91425e-05
G199P	1	1.63808e-05	ins74E	11	0.000180189	W110E	1	1.63808e-05
G199stop	87	0.00142513	ins74K	1	1.63808e-05	W110K	2	3.27617e-05
G199Y	2	3.27617e-05	ins74LAPIAVRstopPNstopLLPKSY	1	1.63808e-05	W110M	1	1.63808e-05
G219F	1	1.63808e-05	ins74NVPIAVQMTKLT	1	1.63808e-05	W110Q	3	4.91425e-05
G219H	4	6.55233e-05	ins74QMTKLA	46	0.000753518	W110S	6	9.8285e-05
G219L	2	3.27617e-05	ins74TKLA	32	0.000524187	W20N	6	9.8285e-05
G219T	2	3.27617e-05	ins75FWC	1	1.63808e-05	W31D	2	3.27617e-05
G219Y	3	4.91425e-05	ins75HCLQMTKLAT	2	3.27617e-05	W31E	1	1.63808e-05
G232E	2	3.27617e-05	ins75stop	1	1.63808e-05	W31I	2	3.27617e-05
G252Y	1	1.63808e-05	ins75VQM	1	1.63808e-05	W31N	1	1.63808e-05
G257Q	3	4.91425e-05	ins76I	1	1.63808e-05	W31P	4	6.55233e-05
G261E	3	4.91425e-05	ins76L	2	3.27617e-05	W31Q	1	1.63808e-05
G261H	1	1.63808e-05	ins76LYIYVSNstopHQstopR	1	1.63808e-05	W31stop	11	0.000180189
G261Q	7	0.000114666	ins76R	1	1.63808e-05	W31V	1	1.63808e-05
G268P	1	1.63808e-05	ins76RRSNstopH	1	1.63808e-05	W31Y	3	4.91425e-05
G268T	2	3.27617e-05	ins76RRSNstopR	1	1.63808e-05	W55H	2	3.27617e-05
G268Y	1	1.63808e-05	ins77I	2	3.27617e-05	W55R	7	0.000114666
G283C	3	4.91425e-05	ins77MAR	14	0.000229332	W55T	1	1.63808e-05
G283F	2	3.27617e-05	ins77MARK	3	4.91425e-05	W58C	9	0.000147427
G283I	3	4.91425e-05	ins77MARKTF	1	1.63808e-05	W58E	2	3.27617e-05
G283P	1	1.63808e-05	ins77MARKTL	2	3.27617e-05	W58V	3	4.91425e-05
G283Q	1	1.63808e-05	ins77MARKTLV	1	1.63808e-05	W75A	2	3.27617e-05
G283T	2	3.27617e-05	ins77stop	2	3.27617e-05	W75I	2	3.27617e-05
G283Y	1	1.63808e-05	ins77stopHQstop	2	3.27617e-05	W75K	3	4.91425e-05
G311L	1	1.63808e-05	ins78ARKTLNSR	1	1.63808e-05	W75M	2	3.27617e-05
G311P	2	3.27617e-05	ins78FQL	1	1.63808e-05	W75T	1	1.63808e-05
G311Q	6	9.8285e-05	ins78V	1	1.63808e-05	W75V	1	1.63808e-05
G311T	19	0.000311236	ins79L	1	1.63808e-05	W75Y	2	3.27617e-05
G339B	5	8.19041e-05	ins79NQHQstopQ	1	1.63808e-05	W92A	7	0.000114666
G339E	59	0.000966469	ins79NstopHQQQSRstop	1	1.63808e-05	W92D	1	1.63808e-05
G339I	2	3.27617e-05	ins79NstopHQstopQ	2	3.27617e-05	W92N	1	1.63808e-05
G339M	5	8.19041e-05	ins79NstopHQstopQSRstop	1	1.63808e-05	Y178E	3	4.91425e-05
G339N	8860	0.145134	ins79NstopHQstopQSRstopPNstopATTEEL	1	1.63808e-05	Y178G	2	3.27617e-05
G339Q	2	3.27617e-05	ins79NstopHQstopQVQMTKLATTEEL	1	1.63808e-05	Y178V	2	3.27617e-05
G339R	10	0.000163808	ins79NstopHQstopR	1	1.63808e-05	Y179A	2	3.27617e-05
G339T	2	3.27617e-05	ins79NstopPIAVRstop	1	1.63808e-05	Y179G	3	4.91425e-05
G339Y	432	0.00707652	ins79RK	1	1.63808e-05	Y179K	20	0.000327617
G35H	3	4.91425e-05	ins79RKTC	1	1.63808e-05	Y179R	1	1.63808e-05
G35I	2	3.27617e-05	ins79RKTF	1	1.63808e-05	Y196A	1	1.63808e-05
G35K	2	3.27617e-05	ins79RKTL	6	9.8285e-05	Y196E	1	1.63808e-05
G35M	1	1.63808e-05	ins79RKTLK	1	1.63808e-05	Y196G	1	1.63808e-05
G35stop	3	4.91425e-05	ins79RKTLKI	1	1.63808e-05	Y196N	2	3.27617e-05
G381F	1	1.63808e-05	ins79RKTLN	1	1.63808e-05	Y196P	1	1.63808e-05
G381N	3	4.91425e-05	ins79RKTLNSLA	2	3.27617e-05	Y196W	1	1.63808e-05
G381P	1	1.63808e-05	ins79RKTLNSLD	6	9.8285e-05	Y199I	1	1.63808e-05
G381T	5	8.19041e-05	ins79RKTLNSLE	4	6.55233e-05	Y199R	2	3.27617e-05
G413D	3	4.91425e-05	ins79RKTLNSLG	9	0.000147427	Y204E	1	1.63808e-05
G413F	3	4.91425e-05	ins79RKTLNSLV	1	1.63808e-05	Y204G	1	1.63808e-05
G413N	3	4.91425e-05	ins79RKTLQTIL	1	1.63808e-05	Y204K	1	1.63808e-05
G413P	5	8.19041e-05	ins79RTRRSNstopHQstopQSRstop	1	1.63808e-05	Y39A	2	3.27617e-05
G413T	2	3.27617e-05	ins79stopHQstopQSRstop	1	1.63808e-05	Y39E	1	1.63808e-05
G416C	1	1.63808e-05	ins79V	1	1.63808e-05	Y39G	4	6.55233e-05
G416D	1	1.63808e-05	ins79VQMTKLATTEEL	1	1.63808e-05	Y39I	132	0.00216227
G416F	2	3.27617e-05	ins7I	2	3.27617e-05	Y39K	2	3.27617e-05
G416P	1	1.63808e-05	ins7K	1	1.63808e-05	Y39Q	2	3.27617e-05
G416T	17	0.000278474	ins81M	2	3.27617e-05	Y39R	6	9.8285e-05
G416Y	1	1.63808e-05	ins81stop	1	1.63808e-05	Y39V	7	0.000114666
G431N	1	1.63808e-05	ins81TL	1	1.63808e-05	Y39W	3	4.91425e-05
G431Q	3	4.91425e-05	ins81WLTTEELP	1	1.63808e-05	Y47D	1	1.63808e-05
G431stop	1	1.63808e-05	ins82LNSL	1	1.63808e-05	Y47E	2	3.27617e-05
G431W	2	3.27617e-05	ins83KN	1	1.63808e-05	Y47K	2	3.27617e-05
G446H	2	3.27617e-05	ins83stopHQstop	1	1.63808e-05	Y71G	5	8.19041e-05
G446Q	1	1.63808e-05	ins83stopQSRstop	1	1.63808e-05	Y71K	1	1.63808e-05
G446W	1	1.63808e-05	ins83stopQSRstopP	5	8.19041e-05	Y71M	2	3.27617e-05
G446Y	5	8.19041e-05	ins83stopQSRstopPNWLL	1	1.63808e-05	Y71stop	6	9.8285e-05
G447I	2	3.27617e-05	ins83stopQSRstopPNWLLP	4	6.55233e-05	Y95G	2	3.27617e-05
G447N	6	9.8285e-05	ins83XXXX	1	1.63808e-05	Y95N	2	3.27617e-05
G447W	8	0.000131047	ins84LLNVPLXXXX	1	1.63808e-05	Y95R	1	1.63808e-05
G476E	4	6.55233e-05	ins84LLPK	1	1.63808e-05
G476M	2	3.27617e-05	ins84LPK	1	1.63808e-05
G476T	618	0.0101234	ins84P	1	1.63808e-05
G482I	3	4.91425e-05	ins84PK	1	1.63808e-05
G482P	2	3.27617e-05	ins84RstopP	1	1.63808e-05
G485E	8	0.000131047	ins84TK	1	1.63808e-05
G485H	5	8.19041e-05	ins85N	2	3.27617e-05
G485I	3	4.91425e-05	ins85SRstopPNWL	2	3.27617e-05
G485L	3	4.91425e-05	ins86L	1	1.63808e-05
G485M	2	3.27617e-05	ins87P	1	1.63808e-05
G485N	10	0.000163808	ins88NSstopRstop	1	1.63808e-05
G485P	2	3.27617e-05	ins88SFSRstopPNWLLPK	1	1.63808e-05
G485stop	2	3.27617e-05	ins88stopPNWLLP	1	1.63808e-05
G485W	2	3.27617e-05	ins88stopPNWLLPK	1	1.63808e-05
G485Y	2	3.27617e-05	ins89stop	1	1.63808e-05
G496K	1	1.63808e-05	ins89WAIQWstop	1	1.63808e-05
G496stop	653	0.0106967	ins8CA	1	1.63808e-05
G496T	89	0.00145789	ins8GCV	3	4.91425e-05
G502Y	3	4.91425e-05	ins8I	1	1.63808e-05
G526F	1	1.63808e-05	ins8P	1	1.63808e-05
G526K	4	6.55233e-05	ins8stop	1	1.63808e-05
G545D	3	4.91425e-05	ins8W	1	1.63808e-05
G545N	3	4.91425e-05	ins90N	1	1.63808e-05
G545P	1	1.63808e-05	ins90WWstopQstop	1	1.63808e-05
G545Q	1	1.63808e-05	ins91C	1	1.63808e-05
G548F	1	1.63808e-05	ins91QTNSWWstop	1	1.63808e-05
G548I	1	1.63808e-05	ins91WIstop	1	1.63808e-05
G548K	5	8.19041e-05	ins91Wstop	2	3.27617e-05
G548N	1	1.63808e-05	ins92ESSWWstopLVKstop	1	1.63808e-05
G550E	1	1.63808e-05	ins93ELPstop	1	1.63808e-05
G550T	1	1.63808e-05	ins93FVV	1	1.63808e-05
G566E	1	1.63808e-05	ins93NSWWstopQstopNERSP	1	1.63808e-05
G566F	1	1.63808e-05	ins93T	1	1.63808e-05
G566stop	1	1.63808e-05	ins94FVVVTVN	1	1.63808e-05
G566T	1	1.63808e-05	ins94stopL	1	1.63808e-05
G593L	2	3.27617e-05	ins94SWWstopQstopN	1	1.63808e-05
G593N	1	1.63808e-05	ins94VDCKstopKISV	1	1.63808e-05
G601L	1	1.63808e-05	ins94VVVTVN	1	1.63808e-05
G601P	1	1.63808e-05	ins94WWstopRstopN	2	3.27617e-05
G601stop	8	0.000131047	ins95C	1	1.63808e-05
G601T	1	1.63808e-05	ins95stop	1	1.63808e-05
G639I	1	1.63808e-05	ins95V	1	1.63808e-05
G639N	1	1.63808e-05	ins95WstopRstopNE	1	1.63808e-05
G648N	1	1.63808e-05	ins95WWstopRstopNE	1	1.63808e-05
G652T	1	1.63808e-05	ins95WWstopRstopNEDL	1	1.63808e-05
G652Y	1	1.63808e-05	ins96GDGKMKDLSPKIXXXRRATRRIRG	1	1.63808e-05
G667B	1	1.63808e-05	ins96stopFKstopR	1	1.63808e-05
G667N	2	3.27617e-05	ins96stopRstopMK	1	1.63808e-05
G669P	1	1.63808e-05	ins96WWstopRstopNER	2	3.27617e-05
G669W	1	1.63808e-05	ins97FVVF	1	1.63808e-05
G700E	3	4.91425e-05	ins97WstopQ	1	1.63808e-05
G700H	3	4.91425e-05	ins98G	1	1.63808e-05
G700I	5	8.19041e-05	ins98L	1	1.63808e-05
G700K	2	3.27617e-05	ins98LQNERSQ	1	1.63808e-05
G72D	5	8.19041e-05	ins98RstopKstopKRSQ	1	1.63808e-05
G72S	12	0.00019657	ins99stop	1	1.63808e-05
G72Y	1	1.63808e-05	ins99stopL	1	1.63808e-05
G744R	5	8.19041e-05	ins99stopNERSQS	1	1.63808e-05
G75I	5	8.19041e-05	ins99Wstop	1	1.63808e-05
G75Y	7	0.000114666	ins9AEM	1	1.63808e-05
G769H	1	1.63808e-05	K100F	1	1.63808e-05
G769Q	1	1.63808e-05	K100G	3	4.91425e-05
G798H	5	8.19041e-05	K100H	2	3.27617e-05
G798Q	1	1.63808e-05	K100L	1	1.63808e-05
G799H	1	1.63808e-05	K100M	1	1.63808e-05
G799stop	4	6.55233e-05	K102D	1	1.63808e-05
G832K	1	1.63808e-05	K102M	2	3.27617e-05
G832M	1	1.63808e-05	K102S	1	1.63808e-05
G832Q	1	1.63808e-05	K102Y	1	1.63808e-05
G832Y	1	1.63808e-05	K127A	2	3.27617e-05
G838Q	2	3.27617e-05	K127G	1	1.63808e-05
G838Y	1	1.63808e-05	K127H	2	3.27617e-05
G842E	1	1.63808e-05	K143D	1	1.63808e-05
G857I	1	1.63808e-05	K143H	1	1.63808e-05
G857M	2	3.27617e-05	K143L	1	1.63808e-05
G857P	1	1.63808e-05	K143T	1	1.63808e-05
G880D	4	6.55233e-05	K143V	1	1.63808e-05
G880P	1	1.63808e-05	K169stop	1	1.63808e-05
G880Q	2	3.27617e-05	K233W	1	1.63808e-05
G885T	2	3.27617e-05	K237D	1	1.63808e-05
G889A	4	6.55233e-05	K237G	1	1.63808e-05
G889D	1	1.63808e-05	K237H	3	4.91425e-05
G889K	2	3.27617e-05	K237Z	1	1.63808e-05
G889Y	1	1.63808e-05	K249S	1	1.63808e-05
G891H	1	1.63808e-05	K249W	1	1.63808e-05
G908E	1	1.63808e-05	K256S	1	1.63808e-05
G910Y	3	4.91425e-05	K257W	1	1.63808e-05
G932E	1	1.63808e-05	K261E	1	1.63808e-05
G932H	1	1.63808e-05	K261G	1	1.63808e-05
G932M	1	1.63808e-05	K261S	2	3.27617e-05
G932Y	3	4.91425e-05	K261Y	1	1.63808e-05
G946F	5	8.19041e-05	K266P	2	3.27617e-05
G971I	1	1.63808e-05	K299S	2	3.27617e-05
G999H	2	3.27617e-05	K299stop	1	1.63808e-05
G999N	3	4.91425e-05	K299Y	1	1.63808e-05
G999W	2	3.27617e-05	K338F	1	1.63808e-05
H1048P	3	4.91425e-05	K338G	2	3.27617e-05
H1048R	1	1.63808e-05	K338S	2	3.27617e-05
H1048W	2	3.27617e-05	K338stop	1	1.63808e-05
H1058E	1	1.63808e-05	K342F	1	1.63808e-05
H1058P	2	3.27617e-05	K342V	2	3.27617e-05
H1058stop	2	3.27617e-05	K347D	1	1.63808e-05
H1058V	1	1.63808e-05	K355D	1	1.63808e-05
H1064D	1	1.63808e-05	K355F	1	1.63808e-05
H1064I	1	1.63808e-05	K355I	1	1.63808e-05
H1064M	1	1.63808e-05	K361D	1	1.63808e-05
H1064R	3	4.91425e-05	K361F	1	1.63808e-05
H1064Y	8	0.000131047	K361stop	1	1.63808e-05
H1083E	1	1.63808e-05	K369M	1	1.63808e-05
H1083V	1	1.63808e-05	K369V	1	1.63808e-05
H1088D	5	8.19041e-05	K370P	1	1.63808e-05
H1088K	4	6.55233e-05	K372D	3	4.91425e-05
H1101C	1	1.63808e-05	K372Y	1	1.63808e-05
H1101V	1	1.63808e-05	K373D	1	1.63808e-05
H1159T	1	1.63808e-05	K375A	5	8.19041e-05
H1271G	1	1.63808e-05	K375H	1	1.63808e-05
H1271Q	5	8.19041e-05	K375I	1	1.63808e-05
H1271V	1	1.63808e-05	K387B	1	1.63808e-05
H146C	3	4.91425e-05	K387L	3	4.91425e-05
H146I	3	4.91425e-05	K387P	2	3.27617e-05
H207D	2	3.27617e-05	K388A	1	1.63808e-05
H207E	8	0.000131047	K388F	2	3.27617e-05
H207G	1	1.63808e-05	K388H	1	1.63808e-05
H207V	2	3.27617e-05	K388P	1	1.63808e-05
H207W	1	1.63808e-05	K388S	1	1.63808e-05
H245G	4	6.55233e-05	K388V	1	1.63808e-05
H245M	2	3.27617e-05	K38A	15	0.000245712
H49A	1	1.63808e-05	K38H	2	3.27617e-05
H49P	4	6.55233e-05	K38S	26	0.000425902
H49stop	2	3.27617e-05	K38V	3	4.91425e-05
H49V	2	3.27617e-05	K38Y	8	0.000131047
H49W	1	1.63808e-05	K405A	1	1.63808e-05
H519G	2	3.27617e-05	K405S	1	1.63808e-05
H625C	1	1.63808e-05	K61G	6	9.8285e-05
H625D	9	0.000147427	K61I	3	4.91425e-05
H625G	1	1.63808e-05	K65F	1	1.63808e-05
H69I	5	8.19041e-05	K65H	1	1.63808e-05
I100D	1	1.63808e-05	K65M	1	1.63808e-05
I100G	1	1.63808e-05	K65V	1	1.63808e-05
I100S	7	0.000114666	L104C	1	1.63808e-05
I1013A	2	3.27617e-05	L104stop	2	3.27617e-05
I1013D	1	1.63808e-05	L104W	2	3.27617e-05
I1013G	1	1.63808e-05	L113A	1	1.63808e-05
I1013H	1	1.63808e-05	L113C	4	6.55233e-05
I1013K	1	1.63808e-05	L113G	1	1.63808e-05
I1018A	13	0.000212951	L113H	1	1.63808e-05
I1018G	1	1.63808e-05	L113K	1	1.63808e-05
I1018R	2	3.27617e-05	L113M	1	1.63808e-05
I1018stop	1	1.63808e-05	L113N	1	1.63808e-05
I101G	1	1.63808e-05	L113R	2	3.27617e-05
I105C	7	0.000114666	L113W	1	1.63808e-05
I105R	2	3.27617e-05	L121A	2	3.27617e-05
I1081K	1	1.63808e-05	L121Q	3	4.91425e-05
I1114Y	1	1.63808e-05	L121Y	1	1.63808e-05
I1115A	2	3.27617e-05	L139C	5	8.19041e-05
I1115P	1	1.63808e-05	L139P	1	1.63808e-05
I1130C	2	3.27617e-05	L139T	1	1.63808e-05
I1130K	2	3.27617e-05	L159H	1	1.63808e-05
I1130P	1	1.63808e-05	L159K	1	1.63808e-05
I1130S	1	1.63808e-05	L159R	1	1.63808e-05
I1132D	2	3.27617e-05	L159stop	1	1.63808e-05
I1132K	1	1.63808e-05	L161A	1	1.63808e-05
I1169Y	3	4.91425e-05	L161E	1	1.63808e-05
I1172J	1	1.63808e-05	L167K	1	1.63808e-05
I1172W	2	3.27617e-05	L219R	2	3.27617e-05
I1172Y	2	3.27617e-05	L219Y	1	1.63808e-05
I1179J	3	4.91425e-05	L221I	1	1.63808e-05
I1179K	1	1.63808e-05	L222I	1	1.63808e-05
I1183K	1	1.63808e-05	L222T	2	3.27617e-05
I1183P	1	1.63808e-05	L223S	1	1.63808e-05
I1183Q	3	4.91425e-05	L224S	4	6.55233e-05
I1183R	2	3.27617e-05	L227E	1	1.63808e-05
I1183Y	1	1.63808e-05	L227Q	2	3.27617e-05
I1198N	2	3.27617e-05	L227W	5	8.19041e-05
I1198W	1	1.63808e-05	L230K	1	1.63808e-05
I1198Y	1	1.63808e-05	L291D	1	1.63808e-05
I119A	1	1.63808e-05	L291K	1	1.63808e-05
I119D	1	1.63808e-05	L291M	1	1.63808e-05
I119W	1	1.63808e-05	L331C	1	1.63808e-05
I1210C	1	1.63808e-05	L331D	1	1.63808e-05
I1210F	1	1.63808e-05	L331H	1	1.63808e-05
I1210Q	1	1.63808e-05	L331P	1	1.63808e-05
I1210R	1	1.63808e-05	L331T	1	1.63808e-05
I1210S	2	3.27617e-05	L339E	1	1.63808e-05
I1221D	1	1.63808e-05	L339G	1	1.63808e-05
I1221N	1	1.63808e-05	L339N	1	1.63808e-05
I1221Q	1	1.63808e-05	L339stop	3	4.91425e-05
I1225G	1	1.63808e-05	L352M	1	1.63808e-05
I1225Y	1	1.63808e-05	L352W	2	3.27617e-05
I1227D	1	1.63808e-05	L353C	1	1.63808e-05
I1227F	4	6.55233e-05	L353F	2	3.27617e-05
I1227P	1	1.63808e-05	L382A	1	1.63808e-05
I1227Q	2	3.27617e-05	L382R	1	1.63808e-05
I1227R	2	3.27617e-05	L394K	3	4.91425e-05
I1232M	2	3.27617e-05	L394Q	4	6.55233e-05
I128E	3	4.91425e-05	L395G	1	1.63808e-05
I128G	2	3.27617e-05	L395Q	1	1.63808e-05
I128H	1	1.63808e-05	L400G	1	1.63808e-05
I197A	1	1.63808e-05	L400H	1	1.63808e-05
I197C	1	1.63808e-05	L400P	1	1.63808e-05
I197E	1	1.63808e-05	L400T	1	1.63808e-05
I197G	1	1.63808e-05	L407P	1	1.63808e-05
I197H	1	1.63808e-05	L45C	2	3.27617e-05
I197R	3	4.91425e-05	L45H	3	4.91425e-05
I203C	9	0.000147427	L45P	5	8.19041e-05
I203D	1	1.63808e-05	L45R	5	8.19041e-05
I203F	1	1.63808e-05	L45T	12	0.00019657
I203P	2	3.27617e-05	L56N	1	1.63808e-05
I203S	9	0.000147427	L56T	3	4.91425e-05
I203Y	123	0.00201484	L64A	2	3.27617e-05
I210H	3	4.91425e-05	L64G	1	1.63808e-05
I210P	7	0.000114666	L64M	2	3.27617e-05
I210Q	9	0.000147427	L64Q	2	3.27617e-05
I210R	7	0.000114666	L64stop	3	4.91425e-05
I210stop	61	0.000999231	M101D	2	3.27617e-05
I231B	1	1.63808e-05	M101E	2	3.27617e-05
I231E	1	1.63808e-05	M101Q	6	9.8285e-05
I231G	1	1.63808e-05	M101S	2	3.27617e-05
I231P	1	1.63808e-05	M101W	2	3.27617e-05
I231W	1	1.63808e-05	M1A	1	1.63808e-05
I233A	7	0.000114666	M1R	2	3.27617e-05
I233D	2	3.27617e-05	M234Q	2	3.27617e-05
I233G	1	1.63808e-05	M317H	1	1.63808e-05
I233Q	2	3.27617e-05	M317N	2	3.27617e-05
I233W	8	0.000131047	M317P	1	1.63808e-05
I235E	1	1.63808e-05	M322A	2	3.27617e-05
I235G	1	1.63808e-05	M411A	1	1.63808e-05
I235stop	1	1.63808e-05	M411D	1	1.63808e-05
I285C	9	0.000147427	N11C	7	0.000114666
I285Q	4	6.55233e-05	N11E	6	9.8285e-05
I285R	5	8.19041e-05	N11F	1	1.63808e-05
I285stop	3	4.91425e-05	N11L	1	1.63808e-05
I285W	1	1.63808e-05	N11R	1	1.63808e-05
I312E	3	4.91425e-05	N11W	1	1.63808e-05
I312G	1	1.63808e-05	N126E	2	3.27617e-05
I312K	1	1.63808e-05	N126G	1	1.63808e-05
I312P	7	0.000114666	N126H	5	8.19041e-05
I312R	4	6.55233e-05	N126V	2	3.27617e-05
I326F	6	9.8285e-05	N140stop	5	8.19041e-05
I326M	3	4.91425e-05	N153stop	2	3.27617e-05
I326N	9	0.000147427	N192R	1	1.63808e-05
I332A	2	3.27617e-05	N192V	1	1.63808e-05
I332E	1	1.63808e-05	N196V	1	1.63808e-05
I332J	4	6.55233e-05	N213G	1	1.63808e-05
I332M	7	0.000114666	N228P	1	1.63808e-05
I332R	5	8.19041e-05	N269G	1	1.63808e-05
I358A	1	1.63808e-05	N269M	1	1.63808e-05
I358C	2	3.27617e-05	N269W	1	1.63808e-05
I358K	1	1.63808e-05	N27E	2	3.27617e-05
I358M	1	1.63808e-05	N27G	23	0.000376759
I358Y	1	1.63808e-05	N27L	2	3.27617e-05
I402H	13	0.000212951	N27M	1	1.63808e-05
I402Q	3	4.91425e-05	N27V	6	9.8285e-05
I402Y	1	1.63808e-05	N285E	2	3.27617e-05
I410K	3	4.91425e-05	N285Q	1	1.63808e-05
I410P	1	1.63808e-05	N29C	2	3.27617e-05
I410stop	3	4.91425e-05	N29V	2	3.27617e-05
I410Y	2	3.27617e-05	N354Q	1	1.63808e-05
I418A	1	1.63808e-05	N47A	1	1.63808e-05
I418F	1	1.63808e-05	N47E	1	1.63808e-05
I418H	1	1.63808e-05	N47G	3	4.91425e-05
I418J	1	1.63808e-05	N47M	1	1.63808e-05
I418M	4	6.55233e-05	N47P	1	1.63808e-05
I418R	1	1.63808e-05	N47V	1	1.63808e-05
I418Y	2	3.27617e-05	N48A	1	1.63808e-05
I434C	1	1.63808e-05	N48C	2	3.27617e-05
I434E	1	1.63808e-05	N48E	1	1.63808e-05
I434N	1	1.63808e-05	N48F	13	0.000212951
I434Q	1	1.63808e-05	N48G	2	3.27617e-05
I468G	1	1.63808e-05	N48Q	4	6.55233e-05
I468J	1	1.63808e-05	N48stop	7	0.000114666
I468N	6	9.8285e-05	N4del	5	8.19041e-05
I468W	3	4.91425e-05	N4G	1	1.63808e-05
I468Y	7	0.000114666	N4M	1	1.63808e-05
I472H	1	1.63808e-05	N4P	1	1.63808e-05
I472N	8	0.000131047	N4Q	2	3.27617e-05
I472P	1	1.63808e-05	N4R	1	1.63808e-05
I569G	1	1.63808e-05	N4V	1	1.63808e-05
I569H	1	1.63808e-05	N75B	1	1.63808e-05
I569K	1	1.63808e-05	N75C	2	3.27617e-05
I569Y	1	1.63808e-05	N75G	4	6.55233e-05
I584C	1	1.63808e-05	N75H	15	0.000245712
I587G	1	1.63808e-05	N77C	2	3.27617e-05
I587N	2	3.27617e-05	N77F	1	1.63808e-05
I587R	3	4.91425e-05	N77G	7	0.000114666
I598J	2	3.27617e-05	N77V	2	3.27617e-05
I598M	1	1.63808e-05	N8E	2	3.27617e-05
I598R	1	1.63808e-05	N8P	1	1.63808e-05
I598W	1	1.63808e-05	N8stop	1	1.63808e-05
I624C	1	1.63808e-05	N8V	1	1.63808e-05
I624J	6	9.8285e-05	P106A	2	3.27617e-05
I624S	2	3.27617e-05	P106D	2	3.27617e-05
I651A	1	1.63808e-05	P106K	3	4.91425e-05
I651D	1	1.63808e-05	P106T	2	3.27617e-05
I651K	1	1.63808e-05	P117H	1	1.63808e-05
I664A	2	3.27617e-05	P117N	2	3.27617e-05
I664E	1	1.63808e-05	P117W	1	1.63808e-05
I670H	1	1.63808e-05	P122D	3	4.91425e-05
I670stop	1	1.63808e-05	P122F	2	3.27617e-05
I68D	1	1.63808e-05	P122K	5	8.19041e-05
I68G	2	3.27617e-05	P122stop	5	8.19041e-05
I68Q	1	1.63808e-05	P122W	1	1.63808e-05
I692A	1	1.63808e-05	P122Y	1	1.63808e-05
I692D	1	1.63808e-05	P13C	1	1.63808e-05
I692R	1	1.63808e-05	P13G	2	3.27617e-05
I692Y	1	1.63808e-05	P13J	3	4.91425e-05
I693C	1	1.63808e-05	P13K	1	1.63808e-05
I693N	1	1.63808e-05	P13N	1	1.63808e-05
I693R	2	3.27617e-05	P13V	82	0.00134323
I712E	2	3.27617e-05	P142V	4	6.55233e-05
I712Q	1	1.63808e-05	P168V	2	3.27617e-05
I712stop	3	4.91425e-05	P199D	1	1.63808e-05
I714F	2	3.27617e-05	P199G	2	3.27617e-05
I714G	1	1.63808e-05	P199N	1	1.63808e-05
I714N	3	4.91425e-05	P207C	2	3.27617e-05
I714Q	3	4.91425e-05	P207D	1	1.63808e-05
I720A	1	1.63808e-05	P20A	1	1.63808e-05
I720E	1	1.63808e-05	P20I	1	1.63808e-05
I720J	4	6.55233e-05	P20M	1	1.63808e-05
I720M	5	8.19041e-05	P20Q	3	4.91425e-05
I720P	1	1.63808e-05	P258K	2	3.27617e-05
I726C	1	1.63808e-05	P258Q	1	1.63808e-05
I726H	1	1.63808e-05	P279N	1	1.63808e-05
I726R	1	1.63808e-05	P279W	3	4.91425e-05
I726stop	1	1.63808e-05	P302E	1	1.63808e-05
I742D	2	3.27617e-05	P302F	2	3.27617e-05
I742G	1	1.63808e-05	P302M	1	1.63808e-05
I742J	1	1.63808e-05	P302T	8	0.000131047
I770C	11	0.000180189	P326A	8	0.000131047
I770G	1	1.63808e-05	P326G	1	1.63808e-05
I770J	3	4.91425e-05	P326I	1	1.63808e-05
I788C	2	3.27617e-05	P326Y	1	1.63808e-05
I788stop	1	1.63808e-05	P344G	1	1.63808e-05
I794A	1	1.63808e-05	P344V	1	1.63808e-05
I805P	1	1.63808e-05	P364Y	1	1.63808e-05
I805Q	1	1.63808e-05	P365G	1	1.63808e-05
I805S	3	4.91425e-05	P368F	2	3.27617e-05
I805stop	1	1.63808e-05	P368K	2	3.27617e-05
I818A	6	9.8285e-05	P383I	1	1.63808e-05
I818Q	2	3.27617e-05	P383K	1	1.63808e-05
I844C	3	4.91425e-05	P396G	1	1.63808e-05
I844H	1	1.63808e-05	P396K	1	1.63808e-05
I844stop	1	1.63808e-05	P396Q	2	3.27617e-05
I850E	2	3.27617e-05	P42A	13	0.000212951
I850K	2	3.27617e-05	P42E	2	3.27617e-05
I850R	1	1.63808e-05	P42F	15	0.000245712
I870G	1	1.63808e-05	P42I	2	3.27617e-05
I870P	1	1.63808e-05	P42K	1	1.63808e-05
I882C	1	1.63808e-05	P42M	2	3.27617e-05
I896K	1	1.63808e-05	P42W	2	3.27617e-05
I896W	1	1.63808e-05	P46D	4	6.55233e-05
I923K	1	1.63808e-05	P46E	1	1.63808e-05
I923N	1	1.63808e-05	P46F	2	3.27617e-05
I931E	1	1.63808e-05	P46G	1	1.63808e-05
I931P	1	1.63808e-05	P46N	2	3.27617e-05
I931Q	1	1.63808e-05	P46Q	8	0.000131047
I973D	1	1.63808e-05	P46stop	1	1.63808e-05
I973P	1	1.63808e-05	P46Y	3	4.91425e-05
I973S	1	1.63808e-05	P67F	7	0.000114666
I980D	1	1.63808e-05	P67G	3	4.91425e-05
I980Q	1	1.63808e-05	P67I	5	8.19041e-05
I993E	3	4.91425e-05	P67N	1	1.63808e-05
I993N	8	0.000131047	P67W	3	4.91425e-05
I993Y	1	1.63808e-05	P6D	2	3.27617e-05
I997C	1	1.63808e-05	P6del	1	1.63808e-05
I997F	3	4.91425e-05	P6G	3	4.91425e-05
I997G	1	1.63808e-05	P73D	2	3.27617e-05
I997stop	2	3.27617e-05	P73E	5	8.19041e-05
ins1000L	1	1.63808e-05	P73F	6	9.8285e-05
ins1002stopGstop	2	3.27617e-05	P73H	19	0.000311236
ins1006KD	1	1.63808e-05	P73I	35	0.000573329
ins1009H	1	1.63808e-05	P73M	5	8.19041e-05
ins1009TSstopQSstopGstopSANstopstopVDH	1	1.63808e-05	P73stop	9	0.000147427
ins1009XXXXXXXX	1	1.63808e-05	P73W	2	3.27617e-05
ins100M	1	1.63808e-05	P73Y	1	1.63808e-05
ins100stop	1	1.63808e-05	P80E	1	1.63808e-05
ins100stopstopE	2	3.27617e-05	P80G	2	3.27617e-05
ins100stopstopPCPTIstopstopCSLFCFHstopEVstopTstop	1	1.63808e-05	P80H	1	1.63808e-05
ins100TstopstopE	1	1.63808e-05	P80I	1	1.63808e-05
ins1010LRP	1	1.63808e-05	P80V	4	6.55233e-05
ins1012stopPT	1	1.63808e-05	P80W	1	1.63808e-05
ins1013stopF	1	1.63808e-05	Q163A	1	1.63808e-05
ins1019NQ	1	1.63808e-05	Q163G	1	1.63808e-05
ins1019stopC	1	1.63808e-05	Q181A	4	6.55233e-05
ins101LLHstopEVstopHN	1	1.63808e-05	Q181F	2	3.27617e-05
ins101LLPL	1	1.63808e-05	Q229W	1	1.63808e-05
ins101stop	1	1.63808e-05	Q239A	1	1.63808e-05
ins101stopE	1	1.63808e-05	Q242S	1	1.63808e-05
ins101stopstop	4	6.55233e-05	Q242V	1	1.63808e-05
ins1022I	2	3.27617e-05	Q244C	1	1.63808e-05
ins1022L	1	1.63808e-05	Q244G	1	1.63808e-05
ins1024CstopS	1	1.63808e-05	Q244S	1	1.63808e-05
ins1024stop	1	1.63808e-05	Q244Z	1	1.63808e-05
ins1024stopS	2	3.27617e-05	Q260I	1	1.63808e-05
ins1025F	1	1.63808e-05	Q260stop	2	3.27617e-05
ins1027CCYstop	1	1.63808e-05	Q272G	1	1.63808e-05
ins1028K	1	1.63808e-05	Q272M	1	1.63808e-05
ins1028stopSstop	1	1.63808e-05	Q272N	1	1.63808e-05
ins1029L	1	1.63808e-05	Q281F	1	1.63808e-05
ins102EG	1	1.63808e-05	Q283A	1	1.63808e-05
ins102LD	3	4.91425e-05	Q289A	1	1.63808e-05
ins1030G	1	1.63808e-05	Q289W	1	1.63808e-05
ins1033Y	1	1.63808e-05	Q28C	2	3.27617e-05
ins103AGFH	1	1.63808e-05	Q28M	6	9.8285e-05
ins103GF	10	0.000163808	Q28S	3	4.91425e-05
ins103L	2	3.27617e-05	Q28T	6	9.8285e-05
ins103LDF	1	1.63808e-05	Q28Z	2	3.27617e-05
ins103stopF	2	3.27617e-05	Q294E	3	4.91425e-05
ins1040VST	1	1.63808e-05	Q303F	2	3.27617e-05
ins1042VETstopIIL	1	1.63808e-05	Q306A	4	6.55233e-05
ins1046LSS	1	1.63808e-05	Q349P	1	1.63808e-05
ins1047H	6	9.8285e-05	Q380A	4	6.55233e-05
ins104C	2	3.27617e-05	Q380I	1	1.63808e-05
ins104ILVLLstopIRRPVPTYCstopstopRYstopCCYstopSLstopISILstopstopS	1	1.63808e-05	Q384V	1	1.63808e-05
ins1053H	1	1.63808e-05	Q386A	1	1.63808e-05
ins1053L	1	1.63808e-05	Q386F	2	3.27617e-05
ins1053VFL	1	1.63808e-05	Q386S	1	1.63808e-05
ins1055VstopCDL	1	1.63808e-05	Q386V	2	3.27617e-05
ins1057KIRSstopEM	1	1.63808e-05	Q389D	2	3.27617e-05
ins1059W	4	6.55233e-05	Q389V	1	1.63808e-05
ins105D	1	1.63808e-05	Q389W	1	1.63808e-05
ins105LFCFHstopEVstopHNKRLD	2	3.27617e-05	Q390D	2	3.27617e-05
ins105LFPSHstopEVLTQstopRLD	1	1.63808e-05	Q390I	1	1.63808e-05
ins105LLPLRSLTstopstopEAG	1	1.63808e-05	Q39D	1	1.63808e-05
ins105Sstop	1	1.63808e-05	Q39I	6	9.8285e-05
ins105stopstopELD	1	1.63808e-05	Q406M	1	1.63808e-05
ins105TLSYHLMMVFILLPLRSLTstopstopEAG	1	1.63808e-05	Q406P	2	3.27617e-05
ins1061stopKS	1	1.63808e-05	Q406S	1	1.63808e-05
ins1062HKKE	1	1.63808e-05	Q406V	1	1.63808e-05
ins1066C	1	1.63808e-05	Q409S	1	1.63808e-05
ins1066DL	1	1.63808e-05	Q418Y	2	3.27617e-05
ins106FL	1	1.63808e-05	Q43C	8	0.000131047
ins106L	1	1.63808e-05	Q43G	7	0.000114666
ins106LSLFL	1	1.63808e-05	Q43I	2	3.27617e-05
ins106VAH	1	1.63808e-05	Q43T	10	0.000163808
ins1070H	1	1.63808e-05	Q43W	9	0.000147427
ins1074A	1	1.63808e-05	Q43Z	2	3.27617e-05
ins1075H	1	1.63808e-05	Q58A	1	1.63808e-05
ins1076DR	1	1.63808e-05	Q58G	2	3.27617e-05
ins1076HN	1	1.63808e-05	Q58K	16	0.000262093
ins1076QL	1	1.63808e-05	Q58S	10	0.000163808
ins1078L	1	1.63808e-05	Q70C	14	0.000229332
ins107PQKQ	17	0.000278474	Q70D	6	9.8285e-05
ins1080HLKVSLFQ	1	1.63808e-05	Q70F	7	0.000114666
ins1080HLSQ	1	1.63808e-05	Q70I	36	0.00058971
ins1081MMEKRR	2	3.27617e-05	Q70N	10	0.000163808
ins1081stopR	1	1.63808e-05	Q70S	11	0.000180189
ins1082PLFQMA	1	1.63808e-05	Q70W	6	9.8285e-05
ins1083LS	1	1.63808e-05	Q7C	1	1.63808e-05
ins1084VC	1	1.63808e-05	Q7F	1	1.63808e-05
ins1088LXSstopRWGMSL	1	1.63808e-05	Q7G	1	1.63808e-05
ins1088stopRCLC	1	1.63808e-05	Q7I	1	1.63808e-05
ins1088T	1	1.63808e-05	Q7N	2	3.27617e-05
ins1089SstopWK	1	1.63808e-05	Q7S	2	3.27617e-05
ins108FHstopE	2	3.27617e-05	Q83A	2	3.27617e-05
ins108YF	1	1.63808e-05	Q83G	1	1.63808e-05
ins1090HTGLstop	2	3.27617e-05	Q83I	1	1.63808e-05
ins1090Lstop	1	1.63808e-05	Q83V	1	1.63808e-05
ins1090MAHTGLstop	1	1.63808e-05	Q83Y	1	1.63808e-05
ins1090XA	1	1.63808e-05	Q9C	1	1.63808e-05
ins1092GVFVSNGTQEKNFTXXXAICHDGKAHFPRE	1	1.63808e-05	Q9G	1	1.63808e-05
ins1092GVFVSNGTQNFTXXXAICHDGKAHFPRE	1	1.63808e-05	Q9I	1	1.63808e-05
ins1092IGX	1	1.63808e-05	Q9T	2	3.27617e-05
ins1093stop	1	1.63808e-05	R107M	1	1.63808e-05
ins1094FVSNGTHSQEKNFTXXXAICHDGKAHFPREGV	1	1.63808e-05	R107V	1	1.63808e-05
ins1097KWHTLVC	1	1.63808e-05	R10H	3	4.91425e-05
ins1097WHTLVC	1	1.63808e-05	R10I	1	1.63808e-05
ins1099Y	1	1.63808e-05	R10M	3	4.91425e-05
ins109AYYVGY	1	1.63808e-05	R10S	4	6.55233e-05
ins109F	1	1.63808e-05	R10T	2	3.27617e-05
ins109KCVCSVIDLL	1	1.63808e-05	R149F	1	1.63808e-05
ins109KQQK	3	4.91425e-05	R149I	1	1.63808e-05
ins109KTTK	1	1.63808e-05	R149Y	1	1.63808e-05
ins109R	1	1.63808e-05	R14I	1	1.63808e-05
ins109XXX	1	1.63808e-05	R14N	1	1.63808e-05
ins10HW	1	1.63808e-05	R14Q	4	6.55233e-05
ins1102LstopHKGI	1	1.63808e-05	R14T	1	1.63808e-05
ins1102stop	1	1.63808e-05	R14V	1	1.63808e-05
ins1103GWTFGAGAALQ	1	1.63808e-05	R177A	1	1.63808e-05
ins1104stop	1	1.63808e-05	R177Y	1	1.63808e-05
ins1105VMLstopstop	2	3.27617e-05	R185stop	3	4.91425e-05
ins1107FLstopTTN	1	1.63808e-05	R189E	1	1.63808e-05
ins1108I	1	1.63808e-05	R189F	4	6.55233e-05
ins1109S	1	1.63808e-05	R189I	1	1.63808e-05
ins110ILWTLK	1	1.63808e-05	R189N	1	1.63808e-05
ins110K	1	1.63808e-05	R191I	1	1.63808e-05
ins110RFE	2	3.27617e-05	R191K	2	3.27617e-05
ins110RFEDPVP	1	1.63808e-05	R203D	1	1.63808e-05
ins110stop	3	4.91425e-05	R203F	1	1.63808e-05
ins1113S	1	1.63808e-05	R259H	1	1.63808e-05
ins1115T	3	4.91425e-05	R277C	2	3.27617e-05
ins1116F	1	1.63808e-05	R277G	1	1.63808e-05
ins1117SVLNDIFSRL	1	1.63808e-05	R277K	2	3.27617e-05
ins1118N	1	1.63808e-05	R293V	1	1.63808e-05
ins111F	2	3.27617e-05	R319I	1	1.63808e-05
ins111FLVPLstopI	1	1.63808e-05	R319Y	2	3.27617e-05
ins111YYKI	1	1.63808e-05	R32D	1	1.63808e-05
ins1121stopLstopC	2	3.27617e-05	R32E	6	9.8285e-05
ins1121WstopLstopC	1	1.63808e-05	R32F	7	0.000114666
ins1122L	1	1.63808e-05	R32M	12	0.00019657
ins1122WstopLstopCC	1	1.63808e-05	R32stop	9	0.000147427
ins1124stopLstopCstop	1	1.63808e-05	R32V	2	3.27617e-05
ins1127stopIHSRRSstopI	10	0.000163808	R36E	2	3.27617e-05
ins1127V	1	1.63808e-05	R36S	2	3.27617e-05
ins1128HSLstopSFATstopIIHSRRSstopIN	1	1.63808e-05	R36T	95	0.00155618
ins1129HSRRSstop	3	4.91425e-05	R385Q	3	4.91425e-05
ins112FVEII	1	1.63808e-05	R40F	3	4.91425e-05
ins112stopD	1	1.63808e-05	R40T	12	0.00019657
ins112XXXXXXXXXXXXXXXXXXXXXQ	1	1.63808e-05	R40W	1	1.63808e-05
ins1130stopYCN	1	1.63808e-05	R40Y	1	1.63808e-05
ins1136stopASXDVGFRW	1	1.63808e-05	R41F	8	0.000131047
ins1137XXX	1	1.63808e-05	R41I	1	1.63808e-05
ins113XXXXXXXXXXXXXXXXXXXXXXXXXXXXXXXXXXXXXXXXXXXXXXXXXXXXXXXXXX	1	1.63808e-05	R41V	4	6.55233e-05
ins1145FIQGGVRstopIFstop	1	1.63808e-05	R68H	1	1.63808e-05
ins1146stopI	2	3.27617e-05	R68I	3	4.91425e-05
ins1146stopIH	1	1.63808e-05	R68N	1	1.63808e-05
ins1148ATstopIRFI	1	1.63808e-05	R68W	2	3.27617e-05
ins114FVVF	1	1.63808e-05	R68Y	1	1.63808e-05
ins114stopstopE	1	1.63808e-05	R88A	1	1.63808e-05
ins114stopstopEAGFLVLLstopIQ	1	1.63808e-05	R88N	1	1.63808e-05
ins114stopstopEAGFLVLLstopIRRP	2	3.27617e-05	R88W	1	1.63808e-05
ins1150ID	1	1.63808e-05	R88Y	3	4.91425e-05
ins1152GVRstopIFstop	1	1.63808e-05	R89N	7	0.000114666
ins1152RFIQGGVRstopIFstop	7	0.000114666	R89P	3	4.91425e-05
ins1154stopC	2	3.27617e-05	R89Q	6	9.8285e-05
ins1159HQMLIstopV	1	1.63808e-05	R89Y	2	3.27617e-05
ins115stopstopstopERYstopCCYstop	1	1.63808e-05	R92A	2	3.27617e-05
ins115VPTYCstopstopRYstopCCYstop	1	1.63808e-05	R92C	1	1.63808e-05
ins115YCstopstopRYstopCCYstop	2	3.27617e-05	R92G	4	6.55233e-05
ins1160S	1	1.63808e-05	R92L	1	1.63808e-05
ins1160WH	2	3.27617e-05	R93D	1	1.63808e-05
ins1163W	1	1.63808e-05	R93F	2	3.27617e-05
ins1164XX	1	1.63808e-05	R93G	1	1.63808e-05
ins1165LGDISGN	1	1.63808e-05	R93I	1	1.63808e-05
ins1165WLSR	1	1.63808e-05	R95A	2	3.27617e-05
ins1166GDISGINASVVNIQKEIDRLNEVAKNLNESLIDLQEXXXXXXXXDVDL	1	1.63808e-05	R95M	1	1.63808e-05
ins1166K	2	3.27617e-05	R95stop	2	3.27617e-05
ins1167AR	2	3.27617e-05	R95W	1	1.63808e-05
ins1167ARDVTstopI	2	3.27617e-05	S105D	1	1.63808e-05
ins1167DIS	1	1.63808e-05	S105F	1	1.63808e-05
ins1167NFYGPFVDRQTAQAAGT	1	1.63808e-05	S105H	1	1.63808e-05
ins1168L	2	3.27617e-05	S105K	3	4.91425e-05
ins1169RstopIFstopE	3	4.91425e-05	S180E	2	3.27617e-05
ins1169XX	2	3.27617e-05	S180H	2	3.27617e-05
ins1169XXX	1	1.63808e-05	S180stop	2	3.27617e-05
ins116CstopstopRYstopstop	1	1.63808e-05	S183E	2	3.27617e-05
ins116PTY	1	1.63808e-05	S183I	2	3.27617e-05
ins116PYstop	1	1.63808e-05	S183Q	1	1.63808e-05
ins116SHTYCstopstop	1	1.63808e-05	S183V	1	1.63808e-05
ins116stopstopRYstop	1	1.63808e-05	S184D	1	1.63808e-05
ins116stopYCstopstopSLL	1	1.63808e-05	S184I	1	1.63808e-05
ins1170LWQF	2	3.27617e-05	S184K	1	1.63808e-05
ins1171KGQQQ	1	1.63808e-05	S186K	2	3.27617e-05
ins1171KVL	1	1.63808e-05	S187G	1	1.63808e-05
ins1171KVLQ	1	1.63808e-05	S187Q	5	8.19041e-05
ins1171M	14	0.000229332	S193A	2	3.27617e-05
ins1171RSEERRVGKEC	1	1.63808e-05	S193E	1	1.63808e-05
ins1171XV	1	1.63808e-05	S193H	1	1.63808e-05
ins1171XXV	3	4.91425e-05	S193stop	1	1.63808e-05
ins1172FRstopHLGHDLG	2	3.27617e-05	S194G	1	1.63808e-05
ins1172stop	1	1.63808e-05	S194M	1	1.63808e-05
ins1172XX	1	1.63808e-05	S194Y	2	3.27617e-05
ins1173I	1	1.63808e-05	S197E	1	1.63808e-05
ins1173XV	1	1.63808e-05	S201K	2	3.27617e-05
ins1173XX	1	1.63808e-05	S201P	1	1.63808e-05
ins1173XXX	1	1.63808e-05	S21D	1	1.63808e-05
ins1174XX	1	1.63808e-05	S21G	1	1.63808e-05
ins1175D	1	1.63808e-05	S21I	3	4.91425e-05
ins1176KKK	1	1.63808e-05	S21K	3	4.91425e-05
ins1176P	1	1.63808e-05	S21V	11	0.000180189
ins1176T	1	1.63808e-05	S21W	3	4.91425e-05
ins1176TAS	1	1.63808e-05	S232L	3	4.91425e-05
ins1177VDPAA	1	1.63808e-05	S235D	1	1.63808e-05
ins1179Fstop	1	1.63808e-05	S235Q	1	1.63808e-05
ins1179stopFRstopH	1	1.63808e-05	S23C	1	1.63808e-05
ins1179stopFRstopHLWHstopCFSCKH	10	0.000163808	S23D	5	8.19041e-05
ins117A	1	1.63808e-05	S23E	2	3.27617e-05
ins117stop	1	1.63808e-05	S23H	1	1.63808e-05
ins117Y	1	1.63808e-05	S23M	17	0.000278474
ins1181IIHHQMLIstopVT	1	1.63808e-05	S23V	3	4.91425e-05
ins1181IIHHQMLIstopVTSLA	1	1.63808e-05	S23W	3	4.91425e-05
ins1181XX	2	3.27617e-05	S250E	2	3.27617e-05
ins1182stopHLWHstopC	1	1.63808e-05	S250M	1	1.63808e-05
ins1182stopPPQstopG	1	1.63808e-05	S255E	1	1.63808e-05
ins1183HHQMLIstopVTSLA	1	1.63808e-05	S26F	15	0.000245712
ins1183HHQMLIstopVTSLALMLP	1	1.63808e-05	S26H	1	1.63808e-05
ins1183stop	1	1.63808e-05	S2C	1	1.63808e-05
ins1183stopV	1	1.63808e-05	S2D	1	1.63808e-05
ins1183TA	1	1.63808e-05	S2Q	2	3.27617e-05
ins1183TAS	1	1.63808e-05	S2T	4	6.55233e-05
ins1183TXXXXXXXXstop	1	1.63808e-05	S310F	2	3.27617e-05
ins1184APM	1	1.63808e-05	S310P	1	1.63808e-05
ins1184ASMRLPXIstopM	1	1.63808e-05	S310stop	1	1.63808e-05
ins1184XPM	1	1.63808e-05	S312C	1	1.63808e-05
ins1184XXX	1	1.63808e-05	S312E	1	1.63808e-05
ins1185AVV	3	4.91425e-05	S312I	1	1.63808e-05
ins1185CstopFRstopH	1	1.63808e-05	S312K	2	3.27617e-05
ins1185QMLIstop	1	1.63808e-05	S312Y	1	1.63808e-05
ins1185QMLIstopV	1	1.63808e-05	S318C	1	1.63808e-05
ins1185QMLIstopVT	2	3.27617e-05	S318K	1	1.63808e-05
ins1185QMLIstopVTSL	1	1.63808e-05	S318W	1	1.63808e-05
ins1185QMLIstopVTSLA	1	1.63808e-05	S327E	2	3.27617e-05
ins1185QstopG	1	1.63808e-05	S327H	3	4.91425e-05
ins1185XXXXXXKstop	1	1.63808e-05	S327K	1	1.63808e-05
ins1186MLIstopVTS	3	4.91425e-05	S327stop	1	1.63808e-05
ins1188stop	1	1.63808e-05	S33A	251	0.00411159
ins1189PQstopG	3	4.91425e-05	S33E	3	4.91425e-05
ins118stopstopS	4	6.55233e-05	S33Y	2	3.27617e-05
ins118XXXXX	1	1.63808e-05	S37D	5	8.19041e-05
ins1190LMLQLstopTFKRNstopPPQstopGC	1	1.63808e-05	S37E	1	1.63808e-05
ins1190XXstop	1	1.63808e-05	S37M	1	1.63808e-05
ins1191XXXXXXXXXXX	1	1.63808e-05	S37R	3	4.91425e-05
ins1192Kstop	1	1.63808e-05	S404Q	1	1.63808e-05
ins1192stop	2	3.27617e-05	S410L	1	1.63808e-05
ins1193XX	1	1.63808e-05	S410Y	2	3.27617e-05
ins1198S	1	1.63808e-05	S412del	2	3.27617e-05
ins1199EXXX	1	1.63808e-05	S413E	1	1.63808e-05
ins1199PAANLMKTT	1	1.63808e-05	S413V	1	1.63808e-05
ins119Y	1	1.63808e-05	S416D	1	1.63808e-05
ins119YCstopstopR	1	1.63808e-05	S416Y	1	1.63808e-05
ins11XXX	1	1.63808e-05	S51G	3	4.91425e-05
ins1205NX	1	1.63808e-05	S51H	1	1.63808e-05
ins1206XX	1	1.63808e-05	S51stop	8	0.000131047
ins1208MSSIstopNG	1	1.63808e-05	S51Y	4	6.55233e-05
ins120stop	1	1.63808e-05	S78D	4	6.55233e-05
ins1214V	1	1.63808e-05	S78F	1	1.63808e-05
ins1215IWLGFIAGLIAIY	1	1.63808e-05	S78P	4	6.55233e-05
ins1215KQFD	1	1.63808e-05	S78Y	1	1.63808e-05
ins1216ARFYS	2	3.27617e-05	S79D	8	0.000131047
ins1216LstopLAstopLPstopstop	1	1.63808e-05	S79E	7	0.000114666
ins1218DCHXN	1	1.63808e-05	S79F	1	1.63808e-05
ins121stop	3	4.91425e-05	S79K	2	3.27617e-05
ins1220F	1	1.63808e-05	S79P	6	9.8285e-05
ins1221W	1	1.63808e-05	S79Y	2	3.27617e-05
ins1223stopLPstopstopWstopQL	1	1.63808e-05	T115A	2	3.27617e-05
ins1224XXXXXXXXXXXXXXXXXXXXXXXXXXXXXXXXXX	1	1.63808e-05	T115Q	1	1.63808e-05
ins122N	1	1.63808e-05	T135F	1	1.63808e-05
ins122YstopCC	1	1.63808e-05	T135H	1	1.63808e-05
ins1232XXXXS	1	1.63808e-05	T135W	2	3.27617e-05
ins1233LS	1	1.63808e-05	T141N	1	1.63808e-05
ins1236XXXXXXXXXXXXXXXXXXXXXXXXXXXX	1	1.63808e-05	T148K	1	1.63808e-05
ins1237F	1	1.63808e-05	T166F	1	1.63808e-05
ins1237HXXXXX	1	1.63808e-05	T166Q	1	1.63808e-05
ins1239AP	4	6.55233e-05	T16H	1	1.63808e-05
ins1239GDNYAFAXXXX	1	1.63808e-05	T16L	2	3.27617e-05
ins1239LAX	1	1.63808e-05	T16Q	3	4.91425e-05
ins1239XXXXXXXV	1	1.63808e-05	T16W	1	1.63808e-05
ins123stopstopstopRYstop	1	1.63808e-05	T16Y	5	8.19041e-05
ins123Y	1	1.63808e-05	T198F	1	1.63808e-05
ins1240DL	1	1.63808e-05	T198G	1	1.63808e-05
ins1241C	1	1.63808e-05	T198M	1	1.63808e-05
ins1241LNS	1	1.63808e-05	T198stop	2	3.27617e-05
ins1243TXXXX	1	1.63808e-05	T198W	1	1.63808e-05
ins1245D	1	1.63808e-05	T205E	1	1.63808e-05
ins1245GCLC	2	3.27617e-05	T245H	1	1.63808e-05
ins1247CCG	1	1.63808e-05	T247F	1	1.63808e-05
ins1247YCR	1	1.63808e-05	T247G	1	1.63808e-05
ins124I	1	1.63808e-05	T247K	2	3.27617e-05
ins124LL	2	3.27617e-05	T247W	3	4.91425e-05
ins124LYstop	1	1.63808e-05	T24C	2	3.27617e-05
ins124QCCYstop	1	1.63808e-05	T24D	1	1.63808e-05
ins124stop	1	1.63808e-05	T24F	1	1.63808e-05
ins124stopCCYstop	1	1.63808e-05	T24Q	1	1.63808e-05
ins1250GG	1	1.63808e-05	T263F	1	1.63808e-05
ins1250SGG	1	1.63808e-05	T263M	2	3.27617e-05
ins1252LISP	1	1.63808e-05	T263Q	1	1.63808e-05
ins125CstopstopRYstopstop	1	1.63808e-05	T263W	1	1.63808e-05
ins125S	1	1.63808e-05	T265R	1	1.63808e-05
ins125stop	1	1.63808e-05	T271C	1	1.63808e-05
ins1263H	1	1.63808e-05	T271E	2	3.27617e-05
ins1264Q	1	1.63808e-05	T271F	1	1.63808e-05
ins1266E	1	1.63808e-05	T271G	1	1.63808e-05
ins1267S	1	1.63808e-05	T271H	2	3.27617e-05
ins1267SQ	1	1.63808e-05	T271M	4	6.55233e-05
ins1269SA	1	1.63808e-05	T271V	6	9.8285e-05
ins126CYstopSLstopIS	1	1.63808e-05	T271W	2	3.27617e-05
ins126L	1	1.63808e-05	T282E	2	3.27617e-05
ins126stop	1	1.63808e-05	T282H	1	1.63808e-05
ins127QstopPSPYHCstopstopR	1	1.63808e-05	T282Q	1	1.63808e-05
ins127Sstop	1	1.63808e-05	T282V	2	3.27617e-05
ins127stop	2	3.27617e-05	T296L	1	1.63808e-05
ins127stopstop	1	1.63808e-05	T296P	1	1.63808e-05
ins127stopstopEAGFLVLLstop	1	1.63808e-05	T325P	2	3.27617e-05
ins127YstopSLstop	1	1.63808e-05	T329F	1	1.63808e-05
ins128Q	1	1.63808e-05	T329G	2	3.27617e-05
ins128stop	1	1.63808e-05	T332K	1	1.63808e-05
ins129L	1	1.63808e-05	T334C	1	1.63808e-05
ins129S	2	3.27617e-05	T334V	3	4.91425e-05
ins129stop	1	1.63808e-05	T362D	1	1.63808e-05
ins129SVTstop	1	1.63808e-05	T362G	1	1.63808e-05
ins130stopstopKWNHYR	1	1.63808e-05	T366E	1	1.63808e-05
ins130TYstop	1	1.63808e-05	T366F	1	1.63808e-05
ins130XXXS	1	1.63808e-05	T379D	1	1.63808e-05
ins131FHstopE	1	1.63808e-05	T379F	2	3.27617e-05
ins131stopstopRLPML	1	1.63808e-05	T391C	1	1.63808e-05
ins131stopstopRYstopCCYstopSS	3	4.91425e-05	T391D	1	1.63808e-05
ins131YstopSS	2	3.27617e-05	T391F	1	1.63808e-05
ins132SILstopstop	1	1.63808e-05	T391G	1	1.63808e-05
ins132stop	2	3.27617e-05	T391H	1	1.63808e-05
ins133ATSLstopSVCstopSYN	1	1.63808e-05	T391Q	2	3.27617e-05
ins134EV	1	1.63808e-05	T391R	1	1.63808e-05
ins134HPKMDH	1	1.63808e-05	T391stop	1	1.63808e-05
ins134I	1	1.63808e-05	T393R	3	4.91425e-05
ins135L	1	1.63808e-05	T49F	2	3.27617e-05
ins135MLW	1	1.63808e-05	T49K	1	1.63808e-05
ins135NVVN	2	3.27617e-05	T49Y	9	0.000147427
ins135QF	2	3.27617e-05	T54H	7	0.000114666
ins135stopC	1	1.63808e-05	T54I	12	0.00019657
ins135stopstopLLLKS	1	1.63808e-05	T54M	3	4.91425e-05
ins135YFR	4	6.55233e-05	T54Q	3	4.91425e-05
ins136FRF	2	3.27617e-05	T54W	1	1.63808e-05
ins136L	1	1.63808e-05	T54Y	3	4.91425e-05
ins137I	1	1.63808e-05	T57C	1	1.63808e-05
ins137stop	1	1.63808e-05	T57D	1	1.63808e-05
ins137stopSLstopI	2	3.27617e-05	T57F	1	1.63808e-05
ins139H	1	1.63808e-05	T57R	5	8.19041e-05
ins13S	4	6.55233e-05	T57Y	3	4.91425e-05
ins140E	1	1.63808e-05	T76D	2	3.27617e-05
ins140I	1	1.63808e-05	T76E	2	3.27617e-05
ins140S	2	3.27617e-05	T76F	2	3.27617e-05
ins140stop	2	3.27617e-05	T76M	2	3.27617e-05
ins140T	2	3.27617e-05	T76Q	4	6.55233e-05
ins141DH	8	0.000131047	T76stop	1	1.63808e-05
ins141DVCSKFGAIS	1	1.63808e-05	T76Y	3	4.91425e-05
ins141E	2	3.27617e-05	T91C	1	1.63808e-05
ins141ISILstopstop	2	3.27617e-05	T91D	3	4.91425e-05
ins141stop	1	1.63808e-05	T91E	1	1.63808e-05
ins141stopISILstopstop	14	0.000229332	T91R	1	1.63808e-05
ins141stopstop	10	0.000163808	T91stop	1	1.63808e-05
ins141TYCstopstopRYstopCCYstopSLstopISILstopstop	4	6.55233e-05	T91V	7	0.000114666
ins141YRstopstopCYT	1	1.63808e-05	T91W	4	6.55233e-05
ins142HKNNKSWMESEFR	1	1.63808e-05	V133E	1	1.63808e-05
ins142HKNNKSWMESEXXXXXXXXXXXX	1	1.63808e-05	V133H	1	1.63808e-05
ins142PstopRKTGstopFQKSstop	1	1.63808e-05	V133I	2	3.27617e-05
ins143LstopstopSIF	1	1.63808e-05	V133N	1	1.63808e-05
ins143PQ	1	1.63808e-05	V133S	2	3.27617e-05
ins143SILstopstopS	6	9.8285e-05	V133Y	1	1.63808e-05
ins143SILstopstopSIF	1	1.63808e-05	V158Q	1	1.63808e-05
ins143SILstopstopSIFstopR	1	1.63808e-05	V158W	1	1.63808e-05
ins143stopQstopSIF	1	1.63808e-05	V246Q	1	1.63808e-05
ins144CstopstopRYstopYCYstopSLstopISILstopstopSIFG	1	1.63808e-05	V270E	2	3.27617e-05
ins144G	1	1.63808e-05	V270H	1	1.63808e-05
ins144K	3	4.91425e-05	V270J	1	1.63808e-05
ins144RLstopstop	1	1.63808e-05	V324D	1	1.63808e-05
ins144stop	1	1.63808e-05	V324W	1	1.63808e-05
ins144stopK	1	1.63808e-05	V350K	2	3.27617e-05
ins144stopS	3	4.91425e-05	V350Q	1	1.63808e-05
ins144stopSLstopISILstopstopSIL	1	1.63808e-05	V392D	3	4.91425e-05
ins145D	24	0.00039314	V392Q	5	8.19041e-05
ins145GP	3	4.91425e-05	V392Y	1	1.63808e-05
ins145HKNNESWMESEFRVXXXXXXXXXXXXXXXXXXXXXXXXXXXXXXXXXLDVYY	1	1.63808e-05	V72C	9	0.000147427
ins145LD	1	1.63808e-05	V72E	4	6.55233e-05
ins145LstopstopSIFGP	1	1.63808e-05	V72H	23	0.000376759
ins145MT	1	1.63808e-05	V72N	7	0.000114666
ins145Q	1	1.63808e-05	V72P	5	8.19041e-05
ins145stop	1	1.63808e-05	V72Q	5	8.19041e-05
ins145stopstopRYstopstopCYstopSLstopISILstopstopSIFG	1	1.63808e-05	V72stop	8	0.000131047
ins145VYY	4	6.55233e-05	V72W	2	3.27617e-05
ins145WD	17	0.000278474	W108E	2	3.27617e-05
ins145WDT	1	1.63808e-05	W108K	3	4.91425e-05
ins145WT	3	4.91425e-05	W108N	1	1.63808e-05
ins145WX	7	0.000114666	W108P	1	1.63808e-05
ins145WXX	38	0.000622472	W132A	2	3.27617e-05
ins145XD	26	0.000425902	W132E	2	3.27617e-05
ins145XXX	1	1.63808e-05	W301Y	1	1.63808e-05
ins146FGP	2	3.27617e-05	W330H	1	1.63808e-05
ins146FLP	1	1.63808e-05	W330I	1	1.63808e-05
ins146N	1	1.63808e-05	W330K	1	1.63808e-05
ins146S	1	1.63808e-05	W330Q	2	3.27617e-05
ins146stopstopRYstopQstopVGTGS	1	1.63808e-05	W330S	3	4.91425e-05
ins146T	1	1.63808e-05	W330stop	5	8.19041e-05
ins146TT	1	1.63808e-05	W330Y	1	1.63808e-05
ins147HI	2	3.27617e-05	W52D	1	1.63808e-05
ins147HTL	1	1.63808e-05	W52H	2	3.27617e-05
ins147KKKKVGstop	1	1.63808e-05	W52I	1	1.63808e-05
ins147LQ	1	1.63808e-05	W52K	4	6.55233e-05
ins147XXXXXXXXKHYY	1	1.63808e-05	W52M	1	1.63808e-05
ins148AGG	1	1.63808e-05	W52Q	1	1.63808e-05
ins148CCP	1	1.63808e-05	Y109G	7	0.000114666
ins148EGR	1	1.63808e-05	Y109K	1	1.63808e-05
ins148KISE	1	1.63808e-05	Y109M	2	3.27617e-05
ins148KN	1	1.63808e-05	Y109R	2	3.27617e-05
ins148QVAG	1	1.63808e-05	Y109W	2	3.27617e-05
ins148S	1	1.63808e-05	Y111K	2	3.27617e-05
ins148SFG	1	1.63808e-05	Y111Q	2	3.27617e-05
ins149HGN	3	4.91425e-05	Y112A	2	3.27617e-05
ins149IIHstopFF	2	3.27617e-05	Y112E	5	8.19041e-05
ins149ITPCIHstopFF	1	1.63808e-05	Y112I	6	9.8285e-05
ins149L	2	3.27617e-05	Y112P	4	6.55233e-05
ins149Q	1	1.63808e-05	Y112Q	2	3.27617e-05
ins149SGG	1	1.63808e-05	Y123C	1	1.63808e-05
ins149TGY	1	1.63808e-05	Y123G	2	3.27617e-05
ins150I	3	4.91425e-05	Y123I	1	1.63808e-05
ins150K	2	3.27617e-05	Y123K	1	1.63808e-05
ins150KV	1	1.63808e-05	Y123Q	3	4.91425e-05
ins150LDG	1	1.63808e-05	Y123R	2	3.27617e-05
ins150LstopstopQHstopstopRYstopQstopV	1	1.63808e-05	Y123T	3	4.91425e-05
ins150stopV	1	1.63808e-05	Y172K	2	3.27617e-05
ins150XX	4	6.55233e-05	Y268A	5	8.19041e-05
ins151AG	1	1.63808e-05	Y268D	1	1.63808e-05
ins151ALG	1	1.63808e-05	Y268K	1	1.63808e-05
ins151CL	1	1.63808e-05	Y268N	5	8.19041e-05
ins151CYLTFL	1	1.63808e-05	Y298E	1	1.63808e-05
ins151L	9	0.000147427	Y298R	1	1.63808e-05
ins151LFL	1	1.63808e-05	Y298T	1	1.63808e-05
ins151LNMSLSLFL	1	1.63808e-05	Y333A	1	1.63808e-05
ins151QKVG	1	1.63808e-05	Y333D	4	6.55233e-05
ins151SL	1	1.63808e-05	Y333M	2	3.27617e-05
ins152CLG	1	1.63808e-05	Y333N	2	3.27617e-05
ins152DGKR	1	1.63808e-05	Y333R	1	1.63808e-05
ins152DGKstop	5	8.19041e-05	Y360C	3	4.91425e-05
ins152DGKstopV	1	1.63808e-05	Y360K	3	4.91425e-05
ins152GKstop	1	1.63808e-05	Y360P	1	1.63808e-05
ins152KSW	2	3.27617e-05	Y360R	2	3.27617e-05
ins152N	1	1.63808e-05	Y86G	1	1.63808e-05
ins152QLK	1	1.63808e-05	Y86I	2	3.27617e-05
ins152RK	2	3.27617e-05	Y86N	2	3.27617e-05
ins152stopK	1	1.63808e-05	Y86P	1	1.63808e-05
ins152stopRK	1	1.63808e-05	Y87N	1	1.63808e-05
ins152XX	1	1.63808e-05	Y87P	2	3.27617e-05
ins153ES	2	3.27617e-05	Y87Q	7	0.000114666
ins153ESX	1	1.63808e-05	Y87R	6	9.8285e-05
ins153GKR	1	1.63808e-05	Y87S	5	8.19041e-05
ins154FP	1	1.63808e-05	Y87V	2	3.27617e-05
ins154G	1	1.63808e-05
ins154ILWTL	1	1.63808e-05
ins154KVS	1	1.63808e-05
ins154LPstop	1	1.63808e-05
ins154R	1	1.63808e-05
ins154stop	1	1.63808e-05
ins154stopFFHT	3	4.91425e-05
ins154VI	1	1.63808e-05
ins154VRQ	1	1.63808e-05
ins155CLLXXX	1	1.63808e-05
ins155KstopVP	1	1.63808e-05
ins155LFstopCEstopL	6	9.8285e-05
ins155LWTLK	4	6.55233e-05
ins155stop	1	1.63808e-05
ins155stopVQSLFstopCEstopL	1	1.63808e-05
ins155XXXXXXXXXXXXXXXXXXXXXXXXXXXXXXXXXXXXXXXXXXXXXXXXXXXXXXXXX	1	1.63808e-05
ins156KVK	1	1.63808e-05
ins156L	1	1.63808e-05
ins156stop	2	3.27617e-05
ins156XXX	3	4.91425e-05
ins157IFILV	1	1.63808e-05
ins157ILVRIIALLNMSLSLFLWTLKEN	2	3.27617e-05
ins157NLA	1	1.63808e-05
ins157stopC	2	3.27617e-05
ins157stopCEstopLRT	1	1.63808e-05
ins157stopM	1	1.63808e-05
ins157stopV	1	1.63808e-05
ins157XX	7	0.000114666
ins157XXX	1	1.63808e-05
ins157XXXXXX	1	1.63808e-05
ins157XXXXXXXXX	1	1.63808e-05
ins158D	1	1.63808e-05
ins158DPVPTYCstopstopRYstopCCYstopSLstopISILstopstopS	1	1.63808e-05
ins158E	1	1.63808e-05
ins158R	1	1.63808e-05
ins158S	2	3.27617e-05
ins158XXXXDFLI	1	1.63808e-05
ins158XXXXXXWLKTNVS	1	1.63808e-05
ins158XXXXXXXXNL	1	1.63808e-05
ins159DGKstop	1	1.63808e-05
ins159EQEED	2	3.27617e-05
ins159Kstop	1	1.63808e-05
ins159LDGKstopVQS	5	8.19041e-05
ins159LDGKstopVQSVG	2	3.27617e-05
ins159LDGKstopVQSVGWKVS	1	1.63808e-05
ins159LDGKstopVQSVGWKVSSEC	2	3.27617e-05
ins159TATVRLQA	1	1.63808e-05
ins159VR	1	1.63808e-05
ins159XXX	17	0.000278474
ins159XXXX	6	9.8285e-05
ins159XXXXX	2	3.27617e-05
ins159XXXXXX	2	3.27617e-05
ins159XXXXXXXX	1	1.63808e-05
ins159XXXXXXXXX	1	1.63808e-05
ins15XXX	1	1.63808e-05
ins160QK	2	3.27617e-05
ins160VRVVNKLXX	1	1.63808e-05
ins161GKstopVQSXX	1	1.63808e-05
ins161M	1	1.63808e-05
ins161stop	1	1.63808e-05
ins161XXXXXX	1	1.63808e-05
ins162Fstop	1	1.63808e-05
ins162KstopVQSXXX	1	1.63808e-05
ins162KstopVQXXXX	1	1.63808e-05
ins162XXX	1	1.63808e-05
ins162YSS	1	1.63808e-05
ins163E	1	1.63808e-05
ins163K	1	1.63808e-05
ins163LLPstopG	1	1.63808e-05
ins163Q	1	1.63808e-05
ins163QI	1	1.63808e-05
ins163stopVQSVGWKVSXXXX	1	1.63808e-05
ins163stopVQSXXXX	3	4.91425e-05
ins164I	1	1.63808e-05
ins164M	2	3.27617e-05
ins164PRQR	1	1.63808e-05
ins164XXXXXXSAN	1	1.63808e-05
ins165NQNSIIHstopFFHTW	1	1.63808e-05
ins165Q	1	1.63808e-05
ins165SLSLFLWTLKENRVISKILGI	2	3.27617e-05
ins165stop	2	3.27617e-05
ins165stopI	1	1.63808e-05
ins165stopL	1	1.63808e-05
ins165XXX	1	1.63808e-05
ins165XXXXXXXXX	1	1.63808e-05
ins165YGPstopRKTGstopFQKSstopGI	1	1.63808e-05
ins166EstopL	2	3.27617e-05
ins166EstopY	1	1.63808e-05
ins166G	1	1.63808e-05
ins166GLVL	1	1.63808e-05
ins166I	1	1.63808e-05
ins166LRILMV	2	3.27617e-05
ins166LS	2	3.27617e-05
ins166stop	2	3.27617e-05
ins166stopCEstopL	1	1.63808e-05
ins166YXXXXXX	1	1.63808e-05
ins167A	2	3.27617e-05
ins167KR	5	8.19041e-05
ins167QLKRALTGIAVEQDKNTQEV	1	1.63808e-05
ins167R	9	0.000147427
ins167RILMVI	1	1.63808e-05
ins167stopRILMVI	1	1.63808e-05
ins167XXX	2	3.27617e-05
ins167XXXXXXX	1	1.63808e-05
ins167XXXXXXXXX	1	1.63808e-05
ins168L	2	3.27617e-05
ins168WT	1	1.63808e-05
ins169C	6	9.8285e-05
ins169FQC	1	1.63808e-05
ins169stop	1	1.63808e-05
ins169V	1	1.63808e-05
ins169XXXXXXXXX	1	1.63808e-05
ins16SEM	1	1.63808e-05
ins16SHSR	1	1.63808e-05
ins170A	1	1.63808e-05
ins170DGKstop	1	1.63808e-05
ins170FIATSLstopS	1	1.63808e-05
ins170GPstopRN	1	1.63808e-05
ins170PVS	1	1.63808e-05
ins170stop	3	4.91425e-05
ins170stopCCYstopSLstop	3	4.91425e-05
ins170stopCCYstopSLstopIS	2	3.27617e-05
ins170stopWLFstopNIFstopA	2	3.27617e-05
ins171F	1	1.63808e-05
ins171L	1	1.63808e-05
ins171stopSMG	1	1.63808e-05
ins172ILstopstop	1	1.63808e-05
ins172L	4	6.55233e-05
ins172LRA	1	1.63808e-05
ins172P	1	1.63808e-05
ins173ATstop	1	1.63808e-05
ins173L	1	1.63808e-05
ins173R	1	1.63808e-05
ins173S	1	1.63808e-05
ins173stopIstopFstop	1	1.63808e-05
ins173XXX	1	1.63808e-05
ins174AF	1	1.63808e-05
ins174F	1	1.63808e-05
ins174KC	1	1.63808e-05
ins174L	1	1.63808e-05
ins174LP	1	1.63808e-05
ins174LSL	4	6.55233e-05
ins174TV	1	1.63808e-05
ins175C	1	1.63808e-05
ins175F	3	4.91425e-05
ins175G	1	1.63808e-05
ins175I	2	3.27617e-05
ins175IL	9	0.000147427
ins175ILD	1	1.63808e-05
ins175ILV	1	1.63808e-05
ins175KTPPIKYFGGFNFSQ	1	1.63808e-05
ins175ND	1	1.63808e-05
ins175NDGV	1	1.63808e-05
ins175PH	2	3.27617e-05
ins175S	1	1.63808e-05
ins175SLS	1	1.63808e-05
ins175stop	2	3.27617e-05
ins175stopSVCstopSY	1	1.63808e-05
ins175stopSVCstopSYK	1	1.63808e-05
ins175stopSVCstopSYN	1	1.63808e-05
ins175stopSVCstopSYNQNSIK	1	1.63808e-05
ins175stopSVCstopSYNQNSIN	1	1.63808e-05
ins175stopSVCstopSYNQNSITPstop	1	1.63808e-05
[truncated: 5,232 more rows]
