# Supplementary material for: In Silico Genome Analysis Reveals the Evolution and Potential Impact of SARS-CoV-2 Omicron Structural Changes on Host Immune Evasion and Antiviral Therapeutics
Source: Viruses. 2022 Nov 6;14(11):2461. doi: 10.3390/v14112461 (PMC9697451; doi:10.3390/v14112461)
Supplement: Supplementary file 1 [file viruses-14-02461-s001.zip › Table_S6_10292022.xlsx]

## Sheet: Omicron_mutations
Table S6 - Mutations found in various proteins (Spike, Envelope, Membrane, Nucleocapsid, nsp1-16, ns3, ns6, ns7a, ns7b, and ns8) of Omicron variant. The mutations are identified in comparison with a reference strain sequence (EPI_ISL_402124). This table characterizes the mutations as insertions, deletions, or point mutations. All the mutations of structural proteins (Spike, Envelope, Membrane, an…
Protein	Insertions		Deletions		Point mutations
	Total	Positions	Total	Positions	Total	Positions
Spike	3927	3Y, 5F, 7VDLstop, 8Hstop, 10HW, 10S, 11XXX, 13S, 15XXX, 16SEM, 16SHSR, 17PRE, 18I, 21KD, 23CY, 23K, 23S, 23SRY, 23stopIF, 23Tstopstop, 25I, 25LHT, 25Y, 26Y, 27HstopFF, 27I, 27WHstopFF, 27XX, 27XXX, 27YTNSFTRGVYYPDKVXXXXTRTQLPPA, 28Hstop, 28L, 28Q, 29A, 29CINstop, 29IEGC, 29S, 30F, 30stop, 30stopF, 30T, 30VVFI, 31HVV, 31L, 31LSIWstop, 32H, 32L, 32N, 32P, 32S, 32Y, 33I, 34R, 34V, 34XXX, 35ASIT, 35G…	1267	V3, F4, L5, V6, L7, L8, P9, L10, V11, S12, S13, Q14, C15, V16, N17, L18, T19, T20, R21, T22, Q23, L24, P25, P26, A27, Y28, T29, N30, S31, F32, T33, R34, G35, V36, Y37, Y38, P39, D40, K41, V42, F43, R44, S45, S46, V47, L48, H49, S50, T51, Q52, D53, L54, F55, L56, P57, F58, F59, S60, N61, V62, T63, W64, F65, H66, A67, I68, H69, V70, S71, G72, T73, N74, G75, T76, K77, R78, F79, D80, N81, P82, V83, L…	18759	Y91W, M177Y, M1I, M1K, M1L, M1T, F275Y, F2A, F2C, F2K, F2L, F2S, F2V, F2W, V395Y, V3A, V3C, V3D, V3F, V3G, V3H, V3I, V3L, V3M, F497Y, F4C, F4I, F4L, F4M, F4R, F4S, F4V, L585V, L5C, L5F, L5I, L5J, L5K, L5M, L5N, L5P, L5S, L5V, V687Y, V6A, V6C, V6D, V6F, V6G, V6I, V6L, V6N, V6S, L767Y, L7C, L7D, L7F, L7G, L7I, L7J, L7K, L7M, L7S, L7stop, L7T, L7V, L894Y, L8A, L8C, L8F, L8G, L8I, L8K, L8M, L8N, L8P,…
Envelope	68	6G, 9I, 13stop, 16H, 16R, 16stopC, 16stopstop, 23R, 24S, 24T, 24TFTstopVGVLLFLAFV, 24XXXX, 25ASYTSHPYCAS, 25EVKALD, 26AAILLTstopVLstopN, 26TstopVG, 26TstopVGV, 26TstopVGVLLFLAFVXF, 27FDC, 27LVTLAILTAXXVLLFLAFVVFL, 27LVTLAILTGVLLFLAFVVFL, 28FLAFVXXXX, 28S, 28stop, 28SWstopSCL, 29HstopP, 31G, 34LTstopVLstop, 34XXXX, 36HPRFD, 36R, 38FVCV, 38IVCV, 38L, 38stop, 38SVCV, 39D, 39DRK, 39G, 39RFD, 40QQEsto…	62	S3, V5, S6, T11, L12, I13, V14, N15, S16, V17, L18, L19, F20, L21, A22, F23, V24, V25, F26, L27, L28, V29, T30, L31, A32, I33, L34, T35, A36, L37, R38, L39, C40, A41, Y42, C43, C44, N45, I46, V47, N48, V49, S50, L51, V52, K53, P54, S55, F56, Y57, V58, Y59, S60, R61, V62, K63, L65, N66, S67, S68, R69, V70	751	M1I, M1L, M1V, Y2C, Y2D, Y2E, Y2F, Y2H, Y2I, S3F, S3L, S3P, S3stop, S3T, F4I, F4L, F4S, F4T, F4Y, V5A, V5F, V5G, V5I, V5L, V5Y, S6A, S6D, S6F, S6I, S6L, S6P, S6Q, S6stop, S6T, E7A, E7D, E7G, E7K, E7Q, E7R, E7stop, E7V, E7Z, E8D, E8G, E8K, E8P, E8R, E8stop, E8V, E8Y, E8Z, T9D, T9E, T9I, T9J, T9K, T9L, T9M, T9N, T9R, T9S, T9stop, T9V, G10A, G10C, G10D, G10R, G10S, G10T, G10V, T11A, T11F, T11K, T11M…
Nucleocapsid	808	4DWR, 5I, 5T, 6L, 6LKI, 7I, 7K, 8CA, 8GCV, 8I, 8P, 8stop, 8W, 9AEM, 11C, 11CT, 11ETSVVTYCTSKAIL, 12H, 12HPAL, 12L, 12LLHYVWWT, 12LRTLRLVD, 12N, 12P, 12T, 13ALRLVDL, 13ALRLVTL, 13F, 13HYVWRTL, 13I, 13L, 13PQYVWRTL, 13XX, 14NDVWWTHQIQ, 15L, 16V, 17L, 18LV, 18TLRFQL, 19VR, 20L, 20LRFNWQstop, 20QIQLAV, 20QIQLAVTRM, 20QTNWQstop, 22IQLAVTR, 22QL, 23LAVTRM, 24A, 24AVTRMV, 24RMV, 24VTTstop, 24VVTRMV, 25Q…	408	N4, G5, P6, Q7, N8, Q9, R10, N11, A12, P13, R14, I15, T16, F17, G18, G19, P20, S21, D22, S23, T24, G25, S26, N27, Q28, N29, G30, E31, R32, S33, G34, A35, R36, S37, K38, Q39, R40, R41, P42, Q43, G44, L45, P46, N47, N48, T49, A50, S51, W52, F53, T54, A55, L56, T57, Q58, H59, G60, K61, E62, D63, L64, K65, F66, P67, R68, G69, Q70, G71, V72, P73, I74, N75, T76, N77, S78, S79, P80, D81, D82, Q83, I84, …	5494	M1AM1I, M1R, M1V, S2A, S2C, S2D, S2F, S2L, S2P, S2Q, S2T, S2Y, D3A, D3B, D3E, D3G, D3H, D3I, D3L, D3N, D3Q, D3S, D3V, D3Y, N4B, N4D, N4F, N4G, N4H, N4I, N4K, N4M, N4P, N4Q, N4R, N4S, N4T, N4V, N4Y, G5A, G5D, G5E, G5K, G5M, G5P, G5R, G5S, G5stop, G5V, P6D, P6G, P6H, P6L, P6S, P6T, Q7C, Q7E, Q7F, Q7G, Q7H, Q7I, Q7K, Q7L, Q7N, Q7P, Q7R, Q7S, Q7stop, Q7Z, N8B, N8C, N8D, N8E, N8H, N8I, N8K, N8P, N8S, …
Membrane	377	5L, 7MLAN, 7T, 9P, 10A, 10AMA, 12XXX, 15APstop, 15Pstop, 16DXX, 16PstopR, 17GM, 17RM, 18GTITVEELKKLLE, 18HTITVEELKKLLE, 19GTstopstop, 19TL, 20TstopstopstopV, 21PSNR, 21PSNXFPI, 21R, 21stopstopstop, 21stopstopstopVSY, 21XXXXXXXX, 22FSYS, 22XXXXXXXX, 23MFP, 23MPTG, 23R, 23stop, 23stopVSYSL, 24A, 24FSYSLH, 24R, 24Y, 25TT, 25XXXXX, 26PIXXX, 26PXXXX, 27A, 27IPYMD, 27SYMD, 28PYMD, 28PYMDL, 28S, 28XN, 2…	211	S4, N5, G6, T7, I8, T9, V10, E11, E12, L13, K14, K15, L16, L17, E18, Q19, W20, N21, L22, V23, I24, G25, F26, L27, F28, L29, T30, W31, I32, C33, L34, L35, Q36, F37, A38, Y39, A40, N41, R42, N43, R44, F45, L46, Y47, I48, I49, K50, L51, I52, F53, L54, W55, L56, L57, W58, P59, V60, T61, L62, A63, C64, F65, V66, L67, A68, A69, V70, Y71, R72, I73, N74, W75, I76, T77, G78, G79, I80, A81, I82, A83, M84, …	2849	M1I, M1L, M1V, A2E, A2G, A2I, A2K, A2P, A2S, A2T, A2V, D3A, D3B, D3C, D3E, D3G, D3H, D3I, D3K, D3M, D3N, D3S, D3T, D3V, D3Y, S4A, S4C, S4F, S4L, S4P, S4T, S4Y, N5B, N5D, N5E, N5F, N5H, N5I, N5K, N5S, N5T, N5Y, G6A, G6C, G6D, G6E, G6L, G6R, G6S, G6V, T7A, T7F, T7I, T7N, T7P, T7S, T7V, I8A, I8C, I8F, I8G, I8L, I8M, I8N, I8S, I8T, I8V, T9A, T9I, T9L, T9N, T9P, T9S, V10A, V10D, V10F, V10G, V10I, V10L…
NSP1-16	7310	NS7a: 46XXXXXXXXXXXXXXXXXXXXXXXXXXXXXXXXXGNSPF, NS8: 43GNSPXXXXXX, NS8: 43GNSPXXXXXXX, NSP10: 106HMERVR, NSP10: 106YNLCstopstop, NSP10: 110LHL, NSP10: 112HLKT, NSP10: 112stop, NSP10: 112WVLH, NSP10: 112WVLHLKTQSV, NSP10: 113KQ, NSP10: 113TQ, NSP10: 113VYTstop, NSP10: 116LP, NSP10: 116RPQSVP, NSP10: 116XVEE, NSP10: 117GK, NSP10: 117GTGTS, NSP10: 118AA, NSP10: 118C, NSP10: 118CLLYTSA, NSP10: 118CLL…	6877	NSP10: A104, NSP10: A18, NSP10: A20, NSP10: A23, NSP10: A24, NSP10: A26, NSP10: A32, NSP10: A54, NSP10: A61, NSP10: A71, NSP10: A9, NSP10: C103, NSP10: C117, NSP10: C120, NSP10: C128, NSP10: C17, NSP10: C41, NSP10: C46, NSP10: C73, NSP10: C74, NSP10: C77, NSP10: C79, NSP10: C90, NSP10: D106, NSP10: D22, NSP10: D29, NSP10: D64, NSP10: D82, NSP10: D91, NSP10: E60, NSP10: E66, NSP10: F110, NSP10: F1…	83965	For better readability, we provided this data in the next sheet
NS3, NS6, NS7a, NS7b, NS8	1902	NS3: 100CRVstopTLstopEstopstopstopGFGL, NS3: 100P, NS3: 100XXXXXXXLCFSLLLAEYKLCKNNNEALAL, NS3: 101CWP, NS3: 101KSH, NS3: 101LPXX, NS3: 101RVstopTLstopEstopstopstopGFGFQ, NS3: 102C, NS3: 102WPstop, NS3: 102Y, NS3: 103AP, NS3: 103L, NS3: 103P, NS3: 103PP, NS3: 103PX, NS3: 103RR, NS3: 103S, NS3: 103SP, NS3: 103stopTLstopEstopstopstop, NS3: 103XX, NS3: 104DSET, NS3: 104F, NS3: 104L, NS3: 104LF, NS3: …	585	NS3: A103, NS3: A110, NS3: A143, NS3: A23, NS3: A31, NS3: A33, NS3: A39, NS3: A51, NS3: A54, NS3: A59, NS3: A72, NS3: A98, NS3: A99, NS3: C130, NS3: C133, NS3: C148, NS3: C153, NS3: C157, NS3: C200, NS3: C81, NS3: D142, NS3: D155, NS3: D173, NS3: D183, NS3: D199, NS3: D210, NS3: D22, NS3: D222, NS3: D238, NS3: D250, NS3: D265, NS3: D27, NS3: E102, NS3: E181, NS3: E19, NS3: E191, NS3: E194, NS3: E…	8438	NS3: A103D, NS3: A103E, NS3: A103F, NS3: A103G, NS3: A103K, NS3: A103L, NS3: A103M, NS3: A103N, NS3: A103P, NS3: A103S, NS3: A103T, NS3: A103V, NS3: A103W, NS3: A103Y, NS3: A110C, NS3: A110D, NS3: A110E, NS3: A110F, NS3: A110G, NS3: A110I, NS3: A110L, NS3: A110M, NS3: A110P, NS3: A110R, NS3: A110S, NS3: A110T, NS3: A110V, NS3: A110Y, NS3: A143C, NS3: A143D, NS3: A143E, NS3: A143G, NS3: A143L, NS3…

## Sheet: nsp1-16
NSP10:A104C
NSP10:A104D
NSP10:A104G
NSP10:A104I
NSP10:A104L
NSP10:A104P
NSP10:A104R
NSP10:A104S
NSP10:A104T
NSP10:A104V
NSP10:A18C
NSP10:A18F
NSP10:A18L
NSP10:A18P
NSP10:A18Q
NSP10:A18S
NSP10:A18T
NSP10:A18V
NSP10:A1S
NSP10:A20C
NSP10:A20G
NSP10:A20L
NSP10:A20M
NSP10:A20Q
NSP10:A20S
NSP10:A20stop
NSP10:A20T
NSP10:A20V
NSP10:A23C
NSP10:A23D
NSP10:A23E
NSP10:A23G
NSP10:A23L
NSP10:A23M
NSP10:A23P
NSP10:A23Q
NSP10:A23S
NSP10:A23T
NSP10:A23V
NSP10:A23Y
NSP10:A24C
NSP10:A24G
NSP10:A24L
NSP10:A24Q
NSP10:A24S
NSP10:A24T
NSP10:A24V
NSP10:A26D
NSP10:A26G
NSP10:A26K
NSP10:A26L
NSP10:A26P
NSP10:A26Q
NSP10:A26R
NSP10:A26S
NSP10:A26T
NSP10:A26V
NSP10:A32C
NSP10:A32D
NSP10:A32G
NSP10:A32I
NSP10:A32L
NSP10:A32P
NSP10:A32S
NSP10:A32stop
NSP10:A32T
NSP10:A32V
NSP10:A4G
NSP10:A4L
NSP10:A4P
NSP10:A4S
NSP10:A4T
NSP10:A4V
NSP10:A54E
NSP10:A54L
NSP10:A54N
NSP10:A54P
NSP10:A54Q
NSP10:A54S
NSP10:A54stop
NSP10:A54T
NSP10:A54V
NSP10:A61D
NSP10:A61F
NSP10:A61K
NSP10:A61L
NSP10:A61N
NSP10:A61P
NSP10:A61S
NSP10:A61stop
NSP10:A61T
NSP10:A61V
NSP10:A61W
NSP10:A71E
NSP10:A71G
NSP10:A71I
NSP10:A71K
NSP10:A71L
NSP10:A71P
NSP10:A71R
NSP10:A71S
NSP10:A71T
NSP10:A71V
NSP10:A9C
NSP10:A9D
NSP10:A9G
NSP10:A9I
NSP10:A9Q
NSP10:A9S
NSP10:A9T
NSP10:A9V
NSP10:C103A
NSP10:C103E
NSP10:C103F
NSP10:C103G
NSP10:C103L
NSP10:C103R
NSP10:C103S
NSP10:C103stop
NSP10:C103T
NSP10:C103W
NSP10:C103Y
NSP10:C117A
NSP10:C117F
NSP10:C117G
NSP10:C117R
NSP10:C117S
NSP10:C117stop
NSP10:C117Y
NSP10:C120D
NSP10:C120F
NSP10:C120G
NSP10:C120H
NSP10:C120L
NSP10:C120M
NSP10:C120N
NSP10:C120R
NSP10:C120S
NSP10:C120stop
NSP10:C120W
NSP10:C120Y
NSP10:C128D
NSP10:C128F
NSP10:C128G
NSP10:C128N
NSP10:C128R
NSP10:C128S
NSP10:C128stop
NSP10:C128T
NSP10:C128W
NSP10:C128Y
NSP10:C130F
NSP10:C130G
NSP10:C130R
NSP10:C130S
NSP10:C130stop
NSP10:C130W
NSP10:C130Y
NSP10:C17F
NSP10:C17G
NSP10:C17L
NSP10:C17S
NSP10:C17stop
NSP10:C17W
NSP10:C41D
NSP10:C41F
NSP10:C41G
NSP10:C41I
NSP10:C41R
NSP10:C41S
NSP10:C41stop
NSP10:C41V
NSP10:C41W
NSP10:C41Y
NSP10:C46F
NSP10:C46G
NSP10:C46K
NSP10:C46L
NSP10:C46P
NSP10:C46R
NSP10:C46S
NSP10:C46stop
NSP10:C46V
NSP10:C46W
NSP10:C46Y
NSP10:C73E
NSP10:C73F
NSP10:C73G
NSP10:C73I
NSP10:C73L
NSP10:C73M
NSP10:C73P
NSP10:C73R
NSP10:C73S
NSP10:C73Y
NSP10:C74F
NSP10:C74I
NSP10:C74L
NSP10:C74N
NSP10:C74R
NSP10:C74S
NSP10:C74T
NSP10:C74W
NSP10:C74Y
NSP10:C77A
NSP10:C77F
NSP10:C77G
NSP10:C77H
NSP10:C77I
NSP10:C77L
NSP10:C77R
NSP10:C77S
NSP10:C77T
NSP10:C77W
NSP10:C77Y
NSP10:C79A
NSP10:C79F
NSP10:C79H
NSP10:C79K
NSP10:C79L
NSP10:C79P
NSP10:C79R
NSP10:C79S
NSP10:C79stop
NSP10:C79T
NSP10:C79V
NSP10:C79Y
NSP10:C90A
NSP10:C90F
NSP10:C90I
NSP10:C90L
NSP10:C90P
NSP10:C90Q
NSP10:C90R
NSP10:C90S
NSP10:C90V
NSP10:D106A
NSP10:D106B
NSP10:D106E
NSP10:D106G
NSP10:D106H
NSP10:D106I
NSP10:D106N
NSP10:D106S
NSP10:D106stop
NSP10:D106T
NSP10:D106V
NSP10:D106Y
NSP10:D131A
NSP10:D131B
NSP10:D131E
NSP10:D131G
NSP10:D131H
NSP10:D131I
NSP10:D131K
NSP10:D131N
NSP10:D131Q
NSP10:D131S
NSP10:D131V
NSP10:D131Y
NSP10:D22A
NSP10:D22B
NSP10:D22E
NSP10:D22G
NSP10:D22H
NSP10:D22I
NSP10:D22M
NSP10:D22N
NSP10:D22Q
NSP10:D22R
NSP10:D22stop
NSP10:D22Y
NSP10:D29A
NSP10:D29B
NSP10:D29E
NSP10:D29G
NSP10:D29I
NSP10:D29K
NSP10:D29N
NSP10:D29R
NSP10:D29T
NSP10:D29V
NSP10:D29Y
NSP10:D64B
NSP10:D64C
NSP10:D64E
NSP10:D64F
NSP10:D64G
NSP10:D64H
NSP10:D64I
NSP10:D64N
NSP10:D64P
NSP10:D64T
NSP10:D64V
NSP10:D64Y
NSP10:D82A
NSP10:D82B
NSP10:D82C
NSP10:D82E
NSP10:D82G
NSP10:D82H
NSP10:D82N
NSP10:D82P
NSP10:D82Q
NSP10:D82R
NSP10:D82S
NSP10:D82T
NSP10:D82V
NSP10:D82W
NSP10:D82Y
NSP10:D91A
NSP10:D91B
NSP10:D91E
NSP10:D91G
NSP10:D91H
NSP10:D91I
NSP10:D91K
NSP10:D91N
NSP10:D91P
NSP10:D91Q
NSP10:D91stop
NSP10:D91T
NSP10:D91V
NSP10:D91Y
NSP10:E135A
NSP10:E135D
NSP10:E135G
NSP10:E135K
NSP10:E135N
NSP10:E135P
NSP10:E135Q
NSP10:E135R
NSP10:E135stop
NSP10:E135V
NSP10:E135Z
NSP10:E60A
NSP10:E60D
NSP10:E60G
NSP10:E60I
NSP10:E60K
NSP10:E60L
NSP10:E60N
NSP10:E60P
NSP10:E60Q
NSP10:E60stop
NSP10:E60V
NSP10:E60Z
NSP10:E66A
NSP10:E66D
NSP10:E66F
NSP10:E66G
NSP10:E66H
NSP10:E66I
NSP10:E66K
NSP10:E66L
NSP10:E66N
NSP10:E66Q
NSP10:E66S
NSP10:E66stop
NSP10:E66Z
NSP10:E6C
NSP10:E6D
NSP10:E6K
NSP10:E6Q
NSP10:E6R
NSP10:E6stop
NSP10:E6V
NSP10:E6Z
NSP10:F110L
NSP10:F110M
NSP10:F110R
NSP10:F110S
NSP10:F110V
NSP10:F110Y
NSP10:F16A
NSP10:F16C
NSP10:F16E
NSP10:F16H
NSP10:F16L
NSP10:F16S
NSP10:F16V
NSP10:F19C
NSP10:F19D
NSP10:F19L
NSP10:F19S
NSP10:F19stop
NSP10:F19T
NSP10:F19V
NSP10:F19Y
NSP10:F68C
NSP10:F68I
NSP10:F68L
NSP10:F68Q
NSP10:F68S
NSP10:F68T
NSP10:F68V
NSP10:F68W
NSP10:F68Y
NSP10:F89C
NSP10:F89I
NSP10:F89L
NSP10:F89N
NSP10:F89P
NSP10:F89S
NSP10:F89stop
NSP10:F89V
NSP10:F89Y
NSP10:G109A
NSP10:G109C
NSP10:G109D
NSP10:G109E
NSP10:G109F
NSP10:G109L
NSP10:G109R
NSP10:G109S
NSP10:G109V
NSP10:G121A
NSP10:G121C
NSP10:G121D
NSP10:G121E
NSP10:G121F
NSP10:G121M
NSP10:G121R
NSP10:G121S
NSP10:G121V
NSP10:G121Y
NSP10:G125A
NSP10:G125C
NSP10:G125D
NSP10:G125F
NSP10:G125P
NSP10:G125Q
NSP10:G125R
NSP10:G125S
NSP10:G125T
NSP10:G125V
NSP10:G125W
NSP10:G127A
NSP10:G127C
NSP10:G127D
NSP10:G127N
NSP10:G127R
NSP10:G127S
NSP10:G127V
NSP10:G2A
NSP10:G2C
NSP10:G2D
NSP10:G2R
NSP10:G2S
NSP10:G2V
NSP10:G34A
NSP10:G34D
NSP10:G34E
NSP10:G34N
NSP10:G34R
NSP10:G34S
NSP10:G34T
NSP10:G34V
NSP10:G34W
NSP10:G34Y
NSP10:G35A
NSP10:G35D
NSP10:G35E
NSP10:G35N
NSP10:G35R
NSP10:G35stop
NSP10:G35T
NSP10:G35V
NSP10:G50A
NSP10:G50C
NSP10:G50L
NSP10:G50R
NSP10:G50S
NSP10:G50T
NSP10:G50V
NSP10:G50W
NSP10:G50Y
NSP10:G52A
NSP10:G52C
NSP10:G52D
NSP10:G52I
NSP10:G52K
NSP10:G52R
NSP10:G52S
NSP10:G52V
NSP10:G69C
NSP10:G69H
NSP10:G69I
NSP10:G69N
NSP10:G69R
NSP10:G69S
NSP10:G69V
NSP10:G69W
NSP10:G69Y
NSP10:G70A
NSP10:G70C
NSP10:G70D
NSP10:G70I
NSP10:G70R
NSP10:G70S
NSP10:G70T
NSP10:G70V
NSP10:G88A
NSP10:G88D
NSP10:G88E
NSP10:G88I
NSP10:G88K
NSP10:G88N
NSP10:G88R
NSP10:G88S
NSP10:G88stop
NSP10:G88T
NSP10:G88V
NSP10:G94C
NSP10:G94D
NSP10:G94K
NSP10:G94L
NSP10:G94N
NSP10:G94R
NSP10:G94S
NSP10:G94V
NSP10:G94Y
NSP10:H48D
NSP10:H48L
NSP10:H48N
NSP10:H48P
NSP10:H48Q
NSP10:H48R
NSP10:H48Y
NSP10:H80A
NSP10:H80C
NSP10:H80I
NSP10:H80L
NSP10:H80N
NSP10:H80P
NSP10:H80Q
NSP10:H80R
NSP10:H80S
NSP10:H80T
NSP10:H80V
NSP10:H80W
NSP10:H80Y
NSP10:H83A
NSP10:H83C
NSP10:H83I
NSP10:H83K
NSP10:H83L
NSP10:H83Q
NSP10:H83R
NSP10:H83S
NSP10:H83stop
NSP10:H83T
NSP10:H83Y
NSP10:I38H
NSP10:I38J
NSP10:I38L
NSP10:I38M
NSP10:I38N
NSP10:I38Q
NSP10:I38R
NSP10:I38S
NSP10:I38T
NSP10:I38V
NSP10:I55J
NSP10:I55K
NSP10:I55L
NSP10:I55M
NSP10:I55N
NSP10:I55R
NSP10:I55stop
NSP10:I55T
NSP10:I55V
NSP10:I81A
NSP10:I81C
NSP10:I81J
NSP10:I81L
NSP10:I81M
NSP10:I81P
NSP10:I81Q
NSP10:I81R
NSP10:I81S
NSP10:I81T
NSP10:I81V
NSP10:I81Y
NSP10:I99G
NSP10:I99J
NSP10:I99K
NSP10:I99L
NSP10:I99M
NSP10:I99N
NSP10:I99Q
NSP10:I99stop
NSP10:I99T
NSP10:I99V
NSP10:K113E
NSP10:K113L
NSP10:K113P
NSP10:K113Q
NSP10:K113R
NSP10:K113stop
NSP10:K113T
NSP10:K113V
NSP10:K113W
NSP10:K124E
NSP10:K124G
NSP10:K124I
NSP10:K124N
NSP10:K124P
NSP10:K124Q
NSP10:K124R
NSP10:K124S
NSP10:K124stop
NSP10:K124T
NSP10:K124V
NSP10:K25A
NSP10:K25C
NSP10:K25E
NSP10:K25I
NSP10:K25L
NSP10:K25N
NSP10:K25Q
NSP10:K25R
NSP10:K25S
NSP10:K25stop
NSP10:K25T
NSP10:K28E
NSP10:K28I
NSP10:K28L
NSP10:K28N
NSP10:K28Q
NSP10:K28R
NSP10:K28T
NSP10:K28Y
NSP10:K43D
NSP10:K43E
NSP10:K43L
NSP10:K43N
NSP10:K43Q
NSP10:K43R
NSP10:K43stop
NSP10:K43T
NSP10:K87H
NSP10:K87I
NSP10:K87L
NSP10:K87N
NSP10:K87Q
NSP10:K87R
NSP10:K87S
NSP10:K87stop
NSP10:K87T
NSP10:K87V
NSP10:K87Y
NSP10:K93A
NSP10:K93L
NSP10:K93N
NSP10:K93R
NSP10:K93stop
NSP10:K95D
NSP10:K95E
NSP10:K95G
NSP10:K95M
NSP10:K95N
NSP10:K95Q
NSP10:K95R
NSP10:K95stop
NSP10:K95T
NSP10:L112F
NSP10:L112I
NSP10:L112J
NSP10:L112P
NSP10:L112Q
NSP10:L112R
NSP10:L112stop
NSP10:L112T
NSP10:L112V
NSP10:L133F
NSP10:L133H
NSP10:L133I
NSP10:L133J
NSP10:L133P
NSP10:L133R
NSP10:L133S
NSP10:L133T
NSP10:L138A
NSP10:L138F
NSP10:L138H
NSP10:L138I
NSP10:L138J
NSP10:L138M
NSP10:L138P
NSP10:L138R
NSP10:L138S
NSP10:L138V
NSP10:L14F
NSP10:L14I
NSP10:L14K
NSP10:L14S
NSP10:L14stop
NSP10:L31A
NSP10:L31I
NSP10:L31J
NSP10:L31P
NSP10:L31Q
NSP10:L31R
NSP10:L31S
NSP10:L31stop
NSP10:L31V
NSP10:L45C
NSP10:L45D
NSP10:L45F
NSP10:L45G
NSP10:L45I
NSP10:L45K
NSP10:L45R
NSP10:L45S
NSP10:L45V
NSP10:L75A
NSP10:L75I
NSP10:L75M
NSP10:L75P
NSP10:L75V
NSP10:L75W
NSP10:L92F
NSP10:L92I
NSP10:L92N
NSP10:L92S
NSP10:L92stop
NSP10:L92V
NSP10:M122A
NSP10:M122F
NSP10:M122G
NSP10:M122I
NSP10:M122K
NSP10:M122L
NSP10:M122P
NSP10:M122R
NSP10:M122T
NSP10:M122V
NSP10:M137A
NSP10:M137I
NSP10:M137K
NSP10:M137L
NSP10:M137R
NSP10:M137T
NSP10:M137V
NSP10:M44C
NSP10:M44D
NSP10:M44I
NSP10:M44L
NSP10:M44R
NSP10:M44T
NSP10:M44V
NSP10:M44Y
NSP10:M63A
NSP10:M63F
NSP10:M63H
NSP10:M63I
NSP10:M63K
NSP10:M63L
NSP10:M63R
NSP10:M63S
NSP10:M63T
NSP10:M63V
NSP10:M63Y
NSP10:N105B
NSP10:N105D
NSP10:N105I
NSP10:N105K
NSP10:N105L
NSP10:N105R
NSP10:N105S
NSP10:N105stop
NSP10:N105T
NSP10:N105Y
NSP10:N10B
NSP10:N10D
NSP10:N10F
NSP10:N10G
NSP10:N10I
NSP10:N10K
NSP10:N10Q
NSP10:N10S
NSP10:N10T
NSP10:N10Y
NSP10:N114A
NSP10:N114D
NSP10:N114H
NSP10:N114I
NSP10:N114K
NSP10:N114S
NSP10:N114T
NSP10:N114Y
NSP10:N3B
NSP10:N3D
NSP10:N3F
NSP10:N3H
NSP10:N3I
NSP10:N3K
NSP10:N3L
NSP10:N3M
NSP10:N3S
NSP10:N3T
NSP10:N3Y
NSP10:N40H
NSP10:N40I
NSP10:N40K
NSP10:N40L
NSP10:N40R
NSP10:N40S
NSP10:N40T
NSP10:N62D
NSP10:N62H
NSP10:N62I
NSP10:N62K
NSP10:N62P
NSP10:N62Q
NSP10:N62S
NSP10:N62T
NSP10:N62V
NSP10:N62Y
NSP10:N85A
NSP10:N85B
NSP10:N85D
NSP10:N85I
NSP10:N85K
NSP10:N85L
NSP10:N85Q
NSP10:N85S
NSP10:N85T
NSP10:N85V
NSP10:N85Y
NSP10:P100H
NSP10:P100I
NSP10:P100K
NSP10:P100L
NSP10:P100M
NSP10:P100R
NSP10:P100S
NSP10:P100T
NSP10:P100V
NSP10:P100Y
NSP10:P107A
NSP10:P107H
NSP10:P107L
NSP10:P107N
NSP10:P107S
NSP10:P107stop
NSP10:P107T
NSP10:P107V
NSP10:P136A
NSP10:P136H
NSP10:P136K
NSP10:P136L
NSP10:P136R
NSP10:P136S
NSP10:P136T
NSP10:P37A
NSP10:P37C
NSP10:P37G
NSP10:P37H
NSP10:P37L
NSP10:P37N
NSP10:P37Q
NSP10:P37R
NSP10:P37S
NSP10:P37T
NSP10:P37V
NSP10:P59A
NSP10:P59G
NSP10:P59K
NSP10:P59L
NSP10:P59M
NSP10:P59N
NSP10:P59Q
NSP10:P59R
NSP10:P59S
NSP10:P59T
NSP10:P84A
NSP10:P84F
NSP10:P84I
NSP10:P84L
NSP10:P84Q
NSP10:P84R
NSP10:P84S
NSP10:P84stop
NSP10:P84T
NSP10:P84V
NSP10:P86A
NSP10:P86F
NSP10:P86H
NSP10:P86K
NSP10:P86L
NSP10:P86R
NSP10:P86S
NSP10:P86stop
NSP10:P86T
NSP10:P8A
NSP10:P8F
NSP10:P8H
NSP10:P8L
NSP10:P8S
NSP10:P8T
NSP10:Q132E
NSP10:Q132H
NSP10:Q132K
NSP10:Q132L
NSP10:Q132N
NSP10:Q132P
NSP10:Q132R
NSP10:Q132stop
NSP10:Q132Z
NSP10:Q139K
NSP10:Q139R
NSP10:Q36D
NSP10:Q36E
NSP10:Q36G
NSP10:Q36H
NSP10:Q36K
NSP10:Q36L
NSP10:Q36N
NSP10:Q36P
NSP10:Q36R
NSP10:Q36stop
NSP10:Q36T
NSP10:Q36V
NSP10:Q36W
NSP10:Q36Z
NSP10:Q53E
NSP10:Q53G
NSP10:Q53H
NSP10:Q53K
NSP10:Q53L
NSP10:Q53N
NSP10:Q53R
NSP10:Q53S
NSP10:Q53stop
NSP10:Q53V
NSP10:Q65A
NSP10:Q65E
NSP10:Q65G
NSP10:Q65H
NSP10:Q65K
NSP10:Q65L
NSP10:Q65N
NSP10:Q65P
NSP10:Q65R
NSP10:Q65stop
NSP10:Q65T
NSP10:Q65V
NSP10:Q98E
NSP10:Q98H
NSP10:Q98I
NSP10:Q98K
NSP10:Q98N
NSP10:Q98P
NSP10:Q98stop
NSP10:Q98T
NSP10:R134A
NSP10:R134C
NSP10:R134H
NSP10:R134K
NSP10:R134L
NSP10:R134N
NSP10:R134P
NSP10:R134S
NSP10:R134stop
NSP10:R78C
NSP10:R78G
NSP10:R78H
NSP10:R78I
NSP10:R78L
NSP10:R78S
NSP10:R78T
NSP10:R78V
NSP10:S11A
NSP10:S11F
NSP10:S11L
NSP10:S11N
NSP10:S11P
NSP10:S11stop
NSP10:S11T
NSP10:S129C
NSP10:S129D
NSP10:S129G
NSP10:S129I
NSP10:S129K
NSP10:S129N
NSP10:S129P
NSP10:S129R
NSP10:S129T
NSP10:S15A
NSP10:S15C
NSP10:S15F
NSP10:S15I
NSP10:S15L
NSP10:S15P
NSP10:S15R
NSP10:S15T
NSP10:S33A
NSP10:S33C
NSP10:S33G
NSP10:S33I
NSP10:S33L
NSP10:S33M
NSP10:S33N
NSP10:S33P
NSP10:S33Q
NSP10:S33R
NSP10:S33stop
NSP10:S33T
NSP10:S33V
NSP10:S33W
NSP10:S67A
NSP10:S67C
NSP10:S67F
NSP10:S67K
NSP10:S67L
NSP10:S67N
NSP10:S67P
NSP10:S67Q
NSP10:S67R
NSP10:S67T
NSP10:S67V
NSP10:S67Y
NSP10:S72A
NSP10:S72I
NSP10:S72K
NSP10:S72L
NSP10:S72N
NSP10:S72P
NSP10:S72R
NSP10:S72stop
NSP10:S72T
NSP10:S72V
NSP10:T101A
NSP10:T101I
NSP10:T101K
NSP10:T101L
NSP10:T101M
NSP10:T101N
NSP10:T101P
NSP10:T101Q
NSP10:T101S
NSP10:T101stop
NSP10:T101V
NSP10:T101Y
NSP10:T102A
NSP10:T102I
NSP10:T102L
NSP10:T102M
NSP10:T102N
NSP10:T102P
NSP10:T102S
NSP10:T102V
NSP10:T111A
NSP10:T111H
NSP10:T111I
NSP10:T111K
NSP10:T111N
NSP10:T111R
NSP10:T111V
NSP10:T111Y
NSP10:T115A
NSP10:T115F
NSP10:T115I
NSP10:T115K
NSP10:T115L
NSP10:T115P
NSP10:T115Q
NSP10:T115R
NSP10:T115S
NSP10:T115V
NSP10:T118A
NSP10:T118I
NSP10:T118K
NSP10:T118N
NSP10:T118P
NSP10:T118R
NSP10:T118S
NSP10:T118V
NSP10:T12A
NSP10:T12C
NSP10:T12G
NSP10:T12I
NSP10:T12K
NSP10:T12N
NSP10:T12P
NSP10:T12S
NSP10:T12Y
NSP10:T39A
NSP10:T39H
NSP10:T39I
NSP10:T39K
NSP10:T39L
NSP10:T39N
NSP10:T39P
NSP10:T39R
NSP10:T39S
NSP10:T39stop
NSP10:T47A
NSP10:T47I
NSP10:T47K
NSP10:T47L
NSP10:T47P
NSP10:T47R
NSP10:T47V
NSP10:T49A
NSP10:T49C
NSP10:T49I
NSP10:T49L
NSP10:T49N
NSP10:T49P
NSP10:T49S
NSP10:T49V
NSP10:T49W
NSP10:T51A
NSP10:T51C
NSP10:T51I
NSP10:T51L
NSP10:T51N
NSP10:T51P
NSP10:T51R
NSP10:T51S
NSP10:T51V
NSP10:T51W
NSP10:T56A
NSP10:T56I
NSP10:T56K
NSP10:T56L
NSP10:T56Q
NSP10:T56R
NSP10:T56S
NSP10:T56stop
NSP10:T56V
NSP10:T56W
NSP10:T58A
NSP10:T58I
NSP10:T58K
NSP10:T58L
NSP10:T58stop
NSP10:T58V
NSP10:T5A
NSP10:T5C
NSP10:T5I
NSP10:T5K
NSP10:T5N
NSP10:T5S
NSP10:T5V
NSP10:V108A
NSP10:V108C
NSP10:V108E
NSP10:V108G
NSP10:V108I
NSP10:V108K
NSP10:V108L
NSP10:V108M
NSP10:V108R
NSP10:V108stop
NSP10:V108T
NSP10:V108W
NSP10:V116A
NSP10:V116C
NSP10:V116D
NSP10:V116F
NSP10:V116G
NSP10:V116I
NSP10:V116L
NSP10:V116N
NSP10:V116P
NSP10:V116S
NSP10:V116T
NSP10:V119A
NSP10:V119D
NSP10:V119F
NSP10:V119G
NSP10:V119I
NSP10:V119L
NSP10:V13A
NSP10:V13C
NSP10:V13G
NSP10:V13I
NSP10:V13L
NSP10:V13Y
NSP10:V21A
NSP10:V21C
NSP10:V21E
NSP10:V21I
NSP10:V21K
NSP10:V21L
NSP10:V21M
NSP10:V21N
NSP10:V21stop
NSP10:V42A
NSP10:V42F
NSP10:V42G
NSP10:V42I
NSP10:V42L
NSP10:V42M
NSP10:V42Q
NSP10:V42stop
NSP10:V57A
NSP10:V57D
NSP10:V57F
NSP10:V57G
NSP10:V57H
NSP10:V57I
NSP10:V57L
NSP10:V57S
NSP10:V57Y
NSP10:V7A
NSP10:V7G
NSP10:V7K
NSP10:V7L
NSP10:V7M
NSP10:V7P
NSP10:V7R
NSP10:V7S
NSP10:V97A
NSP10:V97E
NSP10:V97I
NSP10:V97L
NSP10:V97P
NSP10:V97R
NSP10:V97stop
NSP10:V97T
NSP10:V97Y
NSP10:W123C
NSP10:W123E
NSP10:W123G
NSP10:W123I
NSP10:W123L
NSP10:W123Q
NSP10:W123R
NSP10:W123S
NSP10:W123stop
NSP10:W123V
NSP10:W123Y
NSP10:Y126C
NSP10:Y126D
NSP10:Y126F
NSP10:Y126H
NSP10:Y126L
NSP10:Y126N
NSP10:Y126Q
NSP10:Y126R
NSP10:Y126S
NSP10:Y126stop
NSP10:Y126T
NSP10:Y126W
NSP10:Y27C
NSP10:Y27F
NSP10:Y27G
NSP10:Y27H
NSP10:Y27K
NSP10:Y27L
NSP10:Y27N
NSP10:Y27Q
NSP10:Y27stop
NSP10:Y27T
NSP10:Y27V
NSP10:Y30C
NSP10:Y30D
NSP10:Y30F
NSP10:Y30H
NSP10:Y30I
NSP10:Y30L
NSP10:Y30N
NSP10:Y30S
NSP10:Y30stop
NSP10:Y30V
NSP10:Y76C
NSP10:Y76F
NSP10:Y76G
NSP10:Y76H
NSP10:Y76K
NSP10:Y76L
NSP10:Y76N
NSP10:Y76P
NSP10:Y76stop
NSP10:Y76V
NSP10:Y76W
NSP10:Y96C
NSP10:Y96D
NSP10:Y96F
NSP10:Y96H
NSP10:Y96R
NSP10:Y96S
NSP10:Y96stop
NSP10:Y96T
NSP10:Y96W
NSP12:A125E
NSP12:A125F
NSP12:A125G
NSP12:A125H
NSP12:A125K
NSP12:A125P
NSP12:A125Q
NSP12:A125R
NSP12:A125S
NSP12:A125T
NSP12:A125V
NSP12:A125Y
NSP12:A130C
NSP12:A130D
NSP12:A130F
NSP12:A130G
NSP12:A130I
NSP12:A130K
NSP12:A130P
NSP12:A130S
NSP12:A130stop
NSP12:A130T
NSP12:A130V
NSP12:A130Y
NSP12:A16E
NSP12:A16F
NSP12:A16G
NSP12:A16H
NSP12:A16I
NSP12:A16L
NSP12:A16P
NSP12:A16Q
NSP12:A16R
NSP12:A16S
NSP12:A16T
NSP12:A16V
NSP12:A16Y
NSP12:A176D
NSP12:A176G
NSP12:A176I
NSP12:A176L
NSP12:A176M
NSP12:A176P
NSP12:A176R
NSP12:A176S
NSP12:A176T
NSP12:A176V
NSP12:A17D
NSP12:A17G
NSP12:A17H
NSP12:A17K
NSP12:A17P
NSP12:A17Q
NSP12:A17R
NSP12:A17S
NSP12:A17stop
NSP12:A17T
NSP12:A17V
NSP12:A17Y
NSP12:A185G
NSP12:A185I
NSP12:A185K
NSP12:A185L
NSP12:A185P
NSP12:A185R
NSP12:A185S
NSP12:A185T
NSP12:A185V
NSP12:A195C
NSP12:A195D
NSP12:A195F
NSP12:A195H
NSP12:A195L
NSP12:A195M
NSP12:A195N
NSP12:A195P
NSP12:A195Q
NSP12:A195S
NSP12:A195T
NSP12:A195V
NSP12:A199C
NSP12:A199D
NSP12:A199G
NSP12:A199L
NSP12:A199P
NSP12:A199S
NSP12:A199stop
NSP12:A199T
NSP12:A199V
NSP12:A250C
NSP12:A250D
NSP12:A250G
NSP12:A250I
NSP12:A250L
NSP12:A250M
NSP12:A250P
NSP12:A250R
NSP12:A250S
NSP12:A250stop
NSP12:A250T
NSP12:A250V
NSP12:A253C
NSP12:A253E
NSP12:A253F
NSP12:A253G
NSP12:A253K
NSP12:A253L
NSP12:A253M
NSP12:A253N
NSP12:A253P
NSP12:A253S
NSP12:A253stop
NSP12:A253T
NSP12:A253V
NSP12:A2L
NSP12:A2Q
NSP12:A311C
NSP12:A311D
NSP12:A311E
NSP12:A311F
NSP12:A311I
NSP12:A311K
NSP12:A311L
NSP12:A311P
NSP12:A311Q
NSP12:A311R
NSP12:A311S
NSP12:A311stop
NSP12:A311T
NSP12:A311V
NSP12:A34D
NSP12:A34G
NSP12:A34H
NSP12:A34I
NSP12:A34S
NSP12:A34stop
NSP12:A34T
NSP12:A34V
NSP12:A375C
NSP12:A375D
NSP12:A375G
NSP12:A375I
NSP12:A375L
NSP12:A375S
NSP12:A375T
NSP12:A375V
NSP12:A375Y
NSP12:A376C
NSP12:A376D
NSP12:A376I
NSP12:A376L
NSP12:A376N
NSP12:A376S
NSP12:A376stop
NSP12:A376V
NSP12:A379C
NSP12:A379D
NSP12:A379G
NSP12:A379I
NSP12:A379L
NSP12:A379P
NSP12:A379R
NSP12:A379S
NSP12:A379stop
NSP12:A379T
NSP12:A379V
NSP12:A379W
NSP12:A382G
NSP12:A382I
NSP12:A382L
NSP12:A382P
NSP12:A382R
NSP12:A382S
NSP12:A382T
NSP12:A382V
NSP12:A383C
NSP12:A383D
NSP12:A383G
NSP12:A383I
NSP12:A383L
NSP12:A383M
NSP12:A383P
NSP12:A383R
NSP12:A383S
NSP12:A383stop
NSP12:A383T
NSP12:A383V
NSP12:A399C
NSP12:A399G
NSP12:A399I
NSP12:A399L
NSP12:A399M
NSP12:A399N
NSP12:A399S
NSP12:A399T
NSP12:A399V
NSP12:A400E
NSP12:A400H
NSP12:A400I
NSP12:A400K
NSP12:A400L
NSP12:A400R
NSP12:A400S
NSP12:A400T
NSP12:A400V
NSP12:A400Y
NSP12:A406C
NSP12:A406D
NSP12:A406F
NSP12:A406G
NSP12:A406I
NSP12:A406L
NSP12:A406P
NSP12:A406S
NSP12:A406stop
NSP12:A406T
NSP12:A406V
NSP12:A423C
NSP12:A423D
NSP12:A423K
NSP12:A423L
NSP12:A423N
NSP12:A423P
NSP12:A423R
NSP12:A423S
NSP12:A423T
NSP12:A423V
NSP12:A43D
NSP12:A43G
NSP12:A43I
NSP12:A43K
NSP12:A43L
NSP12:A43Q
NSP12:A43S
NSP12:A43T
NSP12:A43V
NSP12:A43Y
NSP12:A443C
NSP12:A443D
NSP12:A443F
NSP12:A443H
NSP12:A443I
NSP12:A443L
NSP12:A443P
NSP12:A443Q
NSP12:A443S
NSP12:A443stop
NSP12:A443T
NSP12:A443V
NSP12:A443Y
NSP12:A448C
NSP12:A448D
NSP12:A448E
NSP12:A448G
NSP12:A448L
NSP12:A448M
NSP12:A448N
NSP12:A448P
NSP12:A448S
NSP12:A448T
NSP12:A448V
NSP12:A449C
NSP12:A449D
NSP12:A449G
NSP12:A449I
NSP12:A449K
NSP12:A449L
NSP12:A449N
NSP12:A449P
NSP12:A449R
NSP12:A449S
NSP12:A449T
NSP12:A449V
NSP12:A46C
NSP12:A46D
NSP12:A46G
NSP12:A46K
NSP12:A46L
NSP12:A46P
NSP12:A46S
NSP12:A46T
NSP12:A46V
NSP12:A490C
NSP12:A490D
NSP12:A490G
NSP12:A490H
NSP12:A490L
NSP12:A490P
NSP12:A490S
NSP12:A490T
NSP12:A490V
NSP12:A4S
NSP12:A4T
NSP12:A502C
NSP12:A502D
NSP12:A502F
NSP12:A502G
NSP12:A502K
NSP12:A502L
NSP12:A502P
NSP12:A502Q
NSP12:A502R
NSP12:A502S
NSP12:A502T
NSP12:A502V
NSP12:A502Y
NSP12:A512C
NSP12:A512D
NSP12:A512G
NSP12:A512I
NSP12:A512K
NSP12:A512L
NSP12:A512P
NSP12:A512Q
NSP12:A512R
NSP12:A512S
NSP12:A512T
NSP12:A512V
NSP12:A526C
NSP12:A526E
NSP12:A526F
NSP12:A526G
NSP12:A526H
NSP12:A526I
NSP12:A526K
NSP12:A526L
NSP12:A526M
NSP12:A526P
NSP12:A526Q
NSP12:A526S
NSP12:A526stop
NSP12:A526T
NSP12:A526V
NSP12:A529D
NSP12:A529E
NSP12:A529F
NSP12:A529G
NSP12:A529H
NSP12:A529I
NSP12:A529L
NSP12:A529P
NSP12:A529Q
NSP12:A529R
NSP12:A529S
NSP12:A529T
NSP12:A529V
NSP12:A547C
NSP12:A547D
NSP12:A547G
NSP12:A547I
NSP12:A547K
NSP12:A547L
NSP12:A547P
NSP12:A547R
NSP12:A547S
NSP12:A547stop
NSP12:A547T
NSP12:A547V
NSP12:A547Y
NSP12:A550C
NSP12:A550E
NSP12:A550G
NSP12:A550I
NSP12:A550K
NSP12:A550L
NSP12:A550M
NSP12:A550N
NSP12:A550P
NSP12:A550Q
NSP12:A550R
NSP12:A550S
NSP12:A550T
NSP12:A550V
NSP12:A554C
NSP12:A554D
NSP12:A554E
NSP12:A554F
NSP12:A554G
NSP12:A554I
NSP12:A554L
NSP12:A554P
NSP12:A554Q
NSP12:A554S
NSP12:A554stop
NSP12:A554T
NSP12:A554V
NSP12:A554Y
NSP12:A558C
NSP12:A558D
NSP12:A558E
NSP12:A558F
NSP12:A558G
NSP12:A558I
NSP12:A558L
NSP12:A558N
NSP12:A558P
NSP12:A558R
NSP12:A558S
NSP12:A558T
NSP12:A558V
NSP12:A558W
NSP12:A558Y
NSP12:A580C
NSP12:A580D
NSP12:A580G
NSP12:A580I
NSP12:A580K
NSP12:A580L
NSP12:A580N
NSP12:A580P
NSP12:A580Q
NSP12:A580R
NSP12:A580S
NSP12:A580T
NSP12:A580V
NSP12:A581D
NSP12:A581H
NSP12:A581L
NSP12:A581P
NSP12:A581Q
NSP12:A581R
NSP12:A581S
NSP12:A581stop
NSP12:A581T
NSP12:A581V
NSP12:A585D
NSP12:A585E
NSP12:A585G
NSP12:A585I
NSP12:A585N
NSP12:A585P
NSP12:A585R
NSP12:A585S
NSP12:A585T
NSP12:A585V
NSP12:A585Y
NSP12:A625D
NSP12:A625G
NSP12:A625I
NSP12:A625L
NSP12:A625P
NSP12:A625S
NSP12:A625T
NSP12:A625V
NSP12:A634C
NSP12:A634D
NSP12:A634F
NSP12:A634G
NSP12:A634I
NSP12:A634L
NSP12:A634N
NSP12:A634P
NSP12:A634S
NSP12:A634stop
NSP12:A634T
NSP12:A634V
NSP12:A639C
NSP12:A639D
NSP12:A639G
NSP12:A639H
NSP12:A639I
NSP12:A639L
NSP12:A639S
NSP12:A639stop
NSP12:A639T
NSP12:A639V
NSP12:A639Y
NSP12:A656C
NSP12:A656D
NSP12:A656E
NSP12:A656F
NSP12:A656G
NSP12:A656I
NSP12:A656K
NSP12:A656L
NSP12:A656P
NSP12:A656S
NSP12:A656stop
NSP12:A656T
NSP12:A656V
NSP12:A660D
NSP12:A660E
NSP12:A660G
NSP12:A660H
NSP12:A660K
NSP12:A660L
NSP12:A660M
NSP12:A660P
NSP12:A660R
NSP12:A660S
NSP12:A660T
NSP12:A660V
NSP12:A685C
NSP12:A685D
NSP12:A685K
NSP12:A685L
NSP12:A685M
NSP12:A685P
NSP12:A685S
NSP12:A685T
NSP12:A685V
NSP12:A688C
NSP12:A688D
NSP12:A688E
NSP12:A688F
NSP12:A688G
NSP12:A688I
NSP12:A688L
NSP12:A688N
NSP12:A688P
NSP12:A688R
NSP12:A688S
NSP12:A688T
NSP12:A688V
NSP12:A688Y
NSP12:A690C
NSP12:A690D
NSP12:A690F
NSP12:A690G
NSP12:A690H
NSP12:A690L
NSP12:A690M
NSP12:A690P
NSP12:A690S
NSP12:A690stop
NSP12:A690T
NSP12:A690V
NSP12:A699C
NSP12:A699D
NSP12:A699F
NSP12:A699G
NSP12:A699H
NSP12:A699K
NSP12:A699L
NSP12:A699P
NSP12:A699S
NSP12:A699stop
NSP12:A699T
NSP12:A699V
NSP12:A702C
NSP12:A702D
NSP12:A702E
NSP12:A702G
NSP12:A702H
NSP12:A702I
NSP12:A702L
NSP12:A702M
NSP12:A702N
NSP12:A702P
NSP12:A702R
NSP12:A702S
NSP12:A702stop
NSP12:A702T
NSP12:A702V
NSP12:A702Y
NSP12:A706C
NSP12:A706E
NSP12:A706H
NSP12:A706L
NSP12:A706P
NSP12:A706Q
NSP12:A706R
NSP12:A706S
NSP12:A706T
NSP12:A706V
NSP12:A706Y
NSP12:A716C
NSP12:A716D
NSP12:A716F
NSP12:A716G
NSP12:A716H
NSP12:A716K
NSP12:A716L
NSP12:A716M
NSP12:A716P
NSP12:A716S
NSP12:A716stop
NSP12:A716T
NSP12:A716V
NSP12:A716Y
NSP12:A747C
NSP12:A747E
NSP12:A747K
NSP12:A747M
NSP12:A747P
NSP12:A747S
NSP12:A747stop
NSP12:A747T
NSP12:A747V
NSP12:A762C
NSP12:A762D
NSP12:A762I
NSP12:A762L
NSP12:A762M
NSP12:A762Q
NSP12:A762R
NSP12:A762T
NSP12:A762V
NSP12:A771C
NSP12:A771E
NSP12:A771F
NSP12:A771G
NSP12:A771H
NSP12:A771K
NSP12:A771L
NSP12:A771M
NSP12:A771N
NSP12:A771P
NSP12:A771Q
NSP12:A771R
NSP12:A771S
NSP12:A771stop
NSP12:A771T
NSP12:A771V
NSP12:A777C
NSP12:A777D
NSP12:A777F
NSP12:A777G
NSP12:A777H
NSP12:A777I
NSP12:A777K
NSP12:A777L
NSP12:A777R
NSP12:A777S
NSP12:A777stop
NSP12:A777T
NSP12:A777V
NSP12:A777W
NSP12:A777Y
NSP12:A797C
NSP12:A797E
NSP12:A797G
NSP12:A797K
NSP12:A797N
NSP12:A797P
NSP12:A797Q
NSP12:A797S
NSP12:A797stop
NSP12:A797T
NSP12:A797V
NSP12:A840C
NSP12:A840D
NSP12:A840G
NSP12:A840L
NSP12:A840M
NSP12:A840P
NSP12:A840R
NSP12:A840S
NSP12:A840T
NSP12:A840V
NSP12:A863C
NSP12:A863E
NSP12:A863F
NSP12:A863G
NSP12:A863L
NSP12:A863N
NSP12:A863P
NSP12:A863R
NSP12:A863S
NSP12:A863stop
NSP12:A863T
NSP12:A863V
NSP12:A866C
NSP12:A866D
NSP12:A866G
NSP12:A866S
NSP12:A866T
NSP12:A866V
NSP12:A878C
NSP12:A878D
NSP12:A878E
NSP12:A878G
NSP12:A878H
NSP12:A878I
NSP12:A878L
NSP12:A878Q
NSP12:A878R
NSP12:A878S
NSP12:A878stop
NSP12:A878T
NSP12:A878V
NSP12:A923D
NSP12:A923G
NSP12:A923I
NSP12:A923L
NSP12:A923M
NSP12:A923N
NSP12:A923P
NSP12:A923R
NSP12:A923S
NSP12:A923T
NSP12:A923V
NSP12:A95C
NSP12:A95D
NSP12:A95E
NSP12:A95F
NSP12:A95G
NSP12:A95I
NSP12:A95L
NSP12:A95P
NSP12:A95Q
NSP12:A95S
NSP12:A95stop
NSP12:A95T
NSP12:A95V
NSP12:A97D
NSP12:A97E
NSP12:A97G
NSP12:A97K
NSP12:A97L
[truncated: 81,965 more rows]
