# Supplementary material for: In Silico Genome Analysis Reveals the Evolution and Potential Impact of SARS-CoV-2 Omicron Structural Changes on Host Immune Evasion and Antiviral Therapeutics
Source: Viruses. 2022 Nov 6;14(11):2461. doi: 10.3390/v14112461 (PMC9697451; doi:10.3390/v14112461)
Supplement: Supplementary file 1 [file viruses-14-02461-s001.zip › Table_S7_10292022.xlsx]

## Sheet: Sheet1
Table S7 - Mean high binding affinity score of TCEs predicted from the Spike of all three viral variants. The starting and ending positions of the epitopes in the Spike, mean HBA score, and amino acid sequences of the epitopes are provided
Reference's Epitopes				Delta				Omicron
Start	End	meanHBA	Sequence	Start	End	meanHBA	Sequence	Start	End	meanHBA	Sequence
113	127	5.445	KTQSLLIVNNATNVV	113	127	5.445	KTQSLLIVNNATNVV	111	125	5.445	KTQSLLIVNNATNVV
114	128	3.61	TQSLLIVNNATNVVI	114	128	3.61	TQSLLIVNNATNVVI	112	126	3.61	TQSLLIVNNATNVVI
115	129	2.88167	QSLLIVNNATNVVIK	115	129	2.88167	QSLLIVNNATNVVIK	113	127	2.88167	QSLLIVNNATNVVIK
116	130	3.92167	SLLIVNNATNVVIKV	116	130	3.92167	SLLIVNNATNVVIKV	114	128	3.92167	SLLIVNNATNVVIKV
117	131	7.875	LLIVNNATNVVIKVC	117	131	7.875	LLIVNNATNVVIKVC	115	129	7.875	LLIVNNATNVVIKVC
229	243	8.25	LPIGINITRFQTLLA	227	241	8.25	LPIGINITRFQTLLA	226	240	8.25	LPIGINITRFQTLLA		1 common in reference and omicron
230	244	6.86667	PIGINITRFQTLLAL	228	242	6.86667	PIGINITRFQTLLAL	227	241	6.86667	PIGINITRFQTLLAL
231	245	6.80667	IGINITRFQTLLALH	229	243	6.80667	IGINITRFQTLLALH	228	242	6.80667	IGINITRFQTLLALH		1 unique to Delta
232	246	4.01	GINITRFQTLLALHR	230	244	4.01	GINITRFQTLLALHR	229	243	4.01	GINITRFQTLLALHR
233	247	3.99167	INITRFQTLLALHRS	231	245	3.99167	INITRFQTLLALHRS	230	244	3.99167	INITRFQTLLALHRS
234	248	4.25833	NITRFQTLLALHRSY	232	246	4.25833	NITRFQTLLALHRSY	231	245	4.25833	NITRFQTLLALHRSY
235	249	3.74	ITRFQTLLALHRSYL	233	247	3.74	ITRFQTLLALHRSYL	232	246	3.74	ITRFQTLLALHRSYL		4 common in reference and delta
236	250	4.64	TRFQTLLALHRSYLT	234	248	4.64	TRFQTLLALHRSYLT	233	247	4.64	TRFQTLLALHRSYLT
237	251	5.865	RFQTLLALHRSYLTP	235	249	5.865	RFQTLLALHRSYLTP	234	248	5.865	RFQTLLALHRSYLTP		4 unique to Omicron
238	252	9.51667	FQTLLALHRSYLTPG	236	250	9.51667	FQTLLALHRSYLTPG	235	249	9.51667	FQTLLALHRSYLTPG
315	329	8.12167	TSNFRVQPTESIVRF	313	327	8.12167	TSNFRVQPTESIVRF	312	326	8.12167	TSNFRVQPTESIVRF
450	464	9.03333	NYLYRLFRKSNLKPF	448	462	11.05	NYRYRLFRKSNLKPF	447	461	9.03333	NYLYRLFRKSNLKPF
817	831	9.95	FIEDLLFNKVTLADA	815	829	9.95	FIEDLLFNKVTLADA	814	828	9.95	FIEDLLFNKVTLADA
853	867	15.8833	QKFNGLTVLPPLLTD	851	865	15.8833	QKFNGLTVLPPLLTD	850	864	9.675	QKFKGLTVLPPLLTD
893	907	9.3	ALQIPFAMQMAYRFN	891	905	9.3	ALQIPFAMQMAYRFN	890	904	9.3	ALQIPFAMQMAYRFN
894	908	7.15	LQIPFAMQMAYRFNG	892	906	7.15	LQIPFAMQMAYRFNG	891	905	7.15	LQIPFAMQMAYRFNG
895	909	7.18333	QIPFAMQMAYRFNGI	893	907	7.18333	QIPFAMQMAYRFNGI	892	906	7.18333	QIPFAMQMAYRFNGI
896	910	8.6	IPFAMQMAYRFNGIG	894	908	8.6	IPFAMQMAYRFNGIG	893	907	8.6	IPFAMQMAYRFNGIG
957	971	11.0833	QALNTLVKQLSSNFG	955	969	11.0833	QALNTLVKQLSSNFG	954	968	9.5	QALNTLVKQLSSKFG
958	972	9.93333	ALNTLVKQLSSNFGA	956	970	9.93333	ALNTLVKQLSSNFGA	955	969	8.78333	ALNTLVKQLSSKFGA
959	973	10.95	LNTLVKQLSSNFGAI	957	971	10.95	LNTLVKQLSSNFGAI	956	970	9.33333	LNTLVKQLSSKFGAI
1007	1021	7.93333	YVTQQLIRAAEIRAS	1005	1019	7.93333	YVTQQLIRAAEIRAS	1004	1018	7.93333	YVTQQLIRAAEIRAS
1008	1022	4.52667	VTQQLIRAAEIRASA	1006	1020	4.52667	VTQQLIRAAEIRASA	1005	1019	4.52667	VTQQLIRAAEIRASA
1009	1023	4.31333	TQQLIRAAEIRASAN	1007	1021	4.31333	TQQLIRAAEIRASAN	1006	1020	4.31333	TQQLIRAAEIRASAN
1010	1024	3.50333	QQLIRAAEIRASANL	1008	1022	3.50333	QQLIRAAEIRASANL	1007	1021	3.50333	QQLIRAAEIRASANL
1011	1025	4.315	QLIRAAEIRASANLA	1009	1023	4.315	QLIRAAEIRASANLA	1008	1022	4.315	QLIRAAEIRASANLA
1012	1026	3.505	LIRAAEIRASANLAA	1010	1024	3.505	LIRAAEIRASANLAA	1009	1023	3.505	LIRAAEIRASANLAA
1013	1027	4.06	IRAAEIRASANLAAT	1011	1025	4.06	IRAAEIRASANLAAT	1010	1024	4.06	IRAAEIRASANLAAT
1014	1028	3.44333	RAAEIRASANLAATK	1012	1026	3.44333	RAAEIRASANLAATK	1011	1025	3.44333	RAAEIRASANLAATK
1015	1029	3.21	AAEIRASANLAATKM	1013	1027	3.21	AAEIRASANLAATKM	1012	1026	3.21	AAEIRASANLAATKM
1016	1030	3.83	AEIRASANLAATKMS	1014	1028	3.83	AEIRASANLAATKMS	1013	1027	3.83	AEIRASANLAATKMS
1017	1031	7.205	EIRASANLAATKMSE	1015	1029	7.205	EIRASANLAATKMSE	1014	1028	7.205	EIRASANLAATKMSE
